# Supplementary material
Source: publisher figshare collection journal article supplement (https://acs.figshare.com/ndownloader/files/4273508)
Supplement: Supplementary file 1 [file 4273508]

_publ_section_references
;
Bruker (2009). SAINT V7.68A, Bruker AXS, Inc., Madison, WI, USA.

Bruker (2009). APEX2 V2009.9-0, Bruker AXS, Inc., Madison, WI, USA.

Sheldrick, G. M. (2008). SADABS V2008/1, University of G\"ottingen, Germany.

Sheldrick, G. M. (2008). Acta. Cryst. A64, 112-122.
;

data_L(tBu)Co(THF) 
  
_audit_creation_method            SHELXL-97 
_chemical_name_systematic 
; 
 ? 
; 
_chemical_name_common             L(tBu)Co(THF) 
_chemical_melting_point           ? 
_chemical_formula_moiety          'C39 H61 Co N2 O' 
_chemical_formula_sum             'C39 H61 Co N2 O' 
_chemical_formula_weight          632.83 
  
loop_ 
 _atom_type_symbol 
 _atom_type_description 
 _atom_type_scat_dispersion_real 
 _atom_type_scat_dispersion_imag 
 _atom_type_scat_source 
 'C'  'C'   0.0033   0.0016 
 'International Tables Vol C Tables 4.2.6.8 and 6.1.1.4' 
 'H'  'H'   0.0000   0.0000 
 'International Tables Vol C Tables 4.2.6.8 and 6.1.1.4' 
 'N'  'N'   0.0061   0.0033 
 'International Tables Vol C Tables 4.2.6.8 and 6.1.1.4' 
 'O'  'O'   0.0106   0.0060 
 'International Tables Vol C Tables 4.2.6.8 and 6.1.1.4' 
 'Co'  'Co'   0.3494   0.9721 
 'International Tables Vol C Tables 4.2.6.8 and 6.1.1.4' 
  
_symmetry_cell_setting            monoclinic 
_symmetry_space_group_name_H-M    'P 1 21/n 1' 
  
loop_ 
 _symmetry_equiv_pos_as_xyz 
 'x, y, z' 
 '-x+1/2, y+1/2, -z+1/2' 
 '-x, -y, -z' 
 'x-1/2, -y-1/2, z-1/2' 
  
_cell_length_a                    9.4077(8) 
_cell_length_b                    17.7033(14) 
_cell_length_c                    21.4739(17) 
_cell_angle_alpha                 90.00 
_cell_angle_beta                  94.762(2) 
_cell_angle_gamma                 90.00 
_cell_volume                      3564.1(5) 
_cell_formula_units_Z             4 
_cell_measurement_temperature     100.0(1) 
_cell_measurement_reflns_used     4085 
_cell_measurement_theta_min       2.22 
_cell_measurement_theta_max       25.97 
  
_exptl_crystal_description        plate 
_exptl_crystal_colour             orange 
_exptl_crystal_size_max           0.14 
_exptl_crystal_size_mid           0.12 
_exptl_crystal_size_min           0.06 
_exptl_crystal_density_meas       ? 
_exptl_crystal_density_diffrn     1.179 
_exptl_crystal_density_method     'not measured' 
_exptl_crystal_F_000              1376 
_exptl_absorpt_coefficient_mu     0.513 
_exptl_absorpt_correction_type    multi-scan 
_exptl_absorpt_correction_T_min   0.9317 
_exptl_absorpt_correction_T_max   0.9699 
_exptl_absorpt_process_details    'SADABS (Sheldrick, 2008)' 
  
_exptl_special_details 
; 
 ? 
; 
  
_diffrn_ambient_temperature       100.0(1) 
_diffrn_radiation_wavelength      0.71073 
_diffrn_radiation_type            MoK\a 
_diffrn_radiation_source          'fine-focus sealed tube' 
_diffrn_radiation_monochromator   graphite 
_diffrn_measurement_device_type   'Bruker SMART APEX II CCD Platform' 
_diffrn_measurement_method        'area detector, \w scans per \f' 
_diffrn_detector_area_resol_mean  ? 
_diffrn_standards_number          0 
_diffrn_standards_interval_count  ? 
_diffrn_standards_interval_time   ? 
_diffrn_standards_decay_%         ? 
_diffrn_reflns_number             37763 
_diffrn_reflns_av_R_equivalents   0.1633 
_diffrn_reflns_av_sigmaI/netI     0.1140 
_diffrn_reflns_limit_h_min        -11 
_diffrn_reflns_limit_h_max        11 
_diffrn_reflns_limit_k_min        -22 
_diffrn_reflns_limit_k_max        22 
_diffrn_reflns_limit_l_min        -26 
_diffrn_reflns_limit_l_max        26 
_diffrn_reflns_theta_min          1.49 
_diffrn_reflns_theta_max          26.37 
_reflns_number_total              7283 
_reflns_number_gt                 4237 
_reflns_threshold_expression      >2sigma(I) 
  
_computing_data_collection        'APEX2 (Bruker, 2009)' 
_computing_cell_refinement        'SAINT (Bruker, 2009)' 
_computing_data_reduction         'SAINT (Bruker, 2009)' 
_computing_structure_solution     'SIR97 (Altomare et al., 1999)' 
_computing_structure_refinement   'SHELXL-97 (Sheldrick, 2008)' 
_computing_molecular_graphics     'SHELXTL (Sheldrick, 2008)' 
_computing_publication_material   'SHELXTL (Sheldrick, 2008)' 
  
_refine_special_details 
; 
 Refinement of F^2^ against ALL reflections.  The weighted R-factor wR and 
 goodness of fit S are based on F^2^, conventional R-factors R are based 
 on F, with F set to zero for negative F^2^. The threshold expression of 
 F^2^ > 2sigma(F^2^) is used only for calculating R-factors(gt) etc. and is 
 not relevant to the choice of reflections for refinement.  R-factors based 
 on F^2^ are statistically about twice as large as those based on F, and R- 
 factors based on ALL data will be even larger. 
; 
  
_refine_ls_structure_factor_coef  Fsqd 
_refine_ls_matrix_type            full 
_refine_ls_weighting_scheme       calc 
_refine_ls_weighting_details 
 'calc w=1/[\s^2^(Fo^2^)+(0.0466P)^2^+0.2062P] where P=(Fo^2^+2Fc^2^)/3' 
_atom_sites_solution_primary      direct 
_atom_sites_solution_secondary    difmap 
_atom_sites_solution_hydrogens    geom 
_refine_ls_hydrogen_treatment     constr 
_refine_ls_extinction_method      none 
_refine_ls_extinction_coef        ? 
_refine_ls_number_reflns          7283 
_refine_ls_number_parameters      402 
_refine_ls_number_restraints      0 
_refine_ls_R_factor_all           0.1263 
_refine_ls_R_factor_gt            0.0600 
_refine_ls_wR_factor_ref          0.1308 
_refine_ls_wR_factor_gt           0.1081 
_refine_ls_goodness_of_fit_ref    1.004 
_refine_ls_restrained_S_all       1.004 
_refine_ls_shift/su_max           0.001 
_refine_ls_shift/su_mean          0.000 
  
loop_ 
 _atom_site_label 
 _atom_site_type_symbol 
 _atom_site_fract_x 
 _atom_site_fract_y 
 _atom_site_fract_z 
 _atom_site_U_iso_or_equiv 
 _atom_site_adp_type 
 _atom_site_occupancy 
 _atom_site_symmetry_multiplicity 
 _atom_site_calc_flag 
 _atom_site_refinement_flags 
 _atom_site_disorder_assembly 
 _atom_site_disorder_group 
Co1 Co 0.90510(5) 0.24075(3) 0.63049(2) 0.02112(14) Uani 1 1 d . . . 
O1 O 0.9980(2) 0.32506(13) 0.68091(12) 0.0247(6) Uani 1 1 d . . . 
C1 C 1.0409(4) 0.3930(2) 0.64914(19) 0.0290(9) Uani 1 1 d . . . 
H1A H 0.9562 0.4226 0.6334 0.035 Uiso 1 1 calc R . . 
H1B H 1.0962 0.3797 0.6134 0.035 Uiso 1 1 calc R . . 
C2 C 1.1315(4) 0.4376(2) 0.6973(2) 0.0368(11) Uani 1 1 d . . . 
H2A H 1.0742 0.4764 0.7169 0.044 Uiso 1 1 calc R . . 
H2B H 1.2117 0.4625 0.6783 0.044 Uiso 1 1 calc R . . 
C3 C 1.1858(4) 0.3781(2) 0.7447(2) 0.0327(10) Uani 1 1 d . . . 
H3A H 1.2700 0.3512 0.7310 0.039 Uiso 1 1 calc R . . 
H3B H 1.2105 0.4007 0.7863 0.039 Uiso 1 1 calc R . . 
C4 C 1.0586(4) 0.3262(2) 0.74539(18) 0.0296(10) Uani 1 1 d . . . 
H4A H 1.0883 0.2749 0.7594 0.036 Uiso 1 1 calc R . . 
H4B H 0.9888 0.3459 0.7734 0.036 Uiso 1 1 calc R . . 
N11 N 0.9157(3) 0.13678(15) 0.65279(13) 0.0152(6) Uani 1 1 d . . . 
N21 N 0.7767(3) 0.23432(15) 0.55875(13) 0.0150(6) Uani 1 1 d . . . 
C11 C 0.8592(4) -0.00440(18) 0.63160(16) 0.0194(8) Uani 1 1 d . . . 
C21 C 0.8449(4) 0.08279(18) 0.61882(16) 0.0151(7) Uani 1 1 d . . . 
C31 C 0.7518(3) 0.10149(18) 0.56669(16) 0.0162(8) Uani 1 1 d . . . 
H31A H 0.7018 0.0593 0.5483 0.019 Uiso 1 1 calc R . . 
C41 C 0.7178(4) 0.17007(18) 0.53636(16) 0.0165(8) Uani 1 1 d . . . 
C51 C 0.6091(4) 0.16305(19) 0.47862(17) 0.0191(8) Uani 1 1 d . . . 
C12 C 0.9922(4) 0.12724(17) 0.71202(16) 0.0161(8) Uani 1 1 d . . . 
C22 C 0.9172(4) 0.12598(18) 0.76636(16) 0.0181(8) Uani 1 1 d . . . 
C32 C 0.9938(4) 0.12202(19) 0.82396(17) 0.0203(8) Uani 1 1 d . . . 
H32A H 0.9439 0.1209 0.8606 0.024 Uiso 1 1 calc R . . 
C42 C 1.1408(4) 0.11972(19) 0.82971(17) 0.0213(8) Uani 1 1 d . . . 
H42A H 1.1912 0.1158 0.8698 0.026 Uiso 1 1 calc R . . 
C52 C 1.2138(4) 0.12309(18) 0.77693(17) 0.0186(8) Uani 1 1 d . . . 
H52A H 1.3152 0.1230 0.7812 0.022 Uiso 1 1 calc R . . 
C62 C 1.1429(4) 0.12666(17) 0.71726(16) 0.0158(8) Uani 1 1 d . . . 
C72 C 0.7553(4) 0.13430(19) 0.76201(17) 0.0214(8) Uani 1 1 d . . . 
H72A H 0.7180 0.1188 0.7190 0.026 Uiso 1 1 calc R . . 
C82 C 0.7158(4) 0.2169(2) 0.7704(2) 0.0321(10) Uani 1 1 d . . . 
H82A H 0.7578 0.2476 0.7387 0.048 Uiso 1 1 calc R . . 
H82B H 0.7525 0.2340 0.8121 0.048 Uiso 1 1 calc R . . 
H82C H 0.6118 0.2223 0.7659 0.048 Uiso 1 1 calc R . . 
C92 C 0.6845(4) 0.0843(2) 0.80818(18) 0.0268(9) Uani 1 1 d . . . 
H92A H 0.5806 0.0891 0.8011 0.040 Uiso 1 1 calc R . . 
H92B H 0.7151 0.1001 0.8509 0.040 Uiso 1 1 calc R . . 
H92C H 0.7121 0.0316 0.8022 0.040 Uiso 1 1 calc R . . 
C102 C 1.2290(4) 0.13078(18) 0.66020(16) 0.0173(8) Uani 1 1 d . . . 
H10D H 1.1624 0.1219 0.6221 0.021 Uiso 1 1 calc R . . 
C112 C 1.2942(4) 0.20878(19) 0.65487(18) 0.0265(9) Uani 1 1 d . . . 
H11D H 1.2181 0.2467 0.6508 0.040 Uiso 1 1 calc R . . 
H11E H 1.3488 0.2106 0.6180 0.040 Uiso 1 1 calc R . . 
H11F H 1.3576 0.2193 0.6924 0.040 Uiso 1 1 calc R . . 
C122 C 1.3465(4) 0.0712(2) 0.66158(18) 0.0292(9) Uani 1 1 d . . . 
H12A H 1.3049 0.0210 0.6662 0.044 Uiso 1 1 calc R . . 
H12B H 1.4168 0.0811 0.6969 0.044 Uiso 1 1 calc R . . 
H12C H 1.3934 0.0734 0.6225 0.044 Uiso 1 1 calc R . . 
C13 C 0.7789(3) 0.30757(18) 0.53085(16) 0.0165(8) Uani 1 1 d . . . 
C23 C 0.8808(3) 0.32378(18) 0.48869(16) 0.0155(8) Uani 1 1 d . . . 
C33 C 0.8995(4) 0.39851(19) 0.47065(16) 0.0208(8) Uani 1 1 d . . . 
H33A H 0.9708 0.4101 0.4433 0.025 Uiso 1 1 calc R . . 
C43 C 0.8166(4) 0.45623(19) 0.49174(17) 0.0218(8) Uani 1 1 d . . . 
H43A H 0.8305 0.5069 0.4791 0.026 Uiso 1 1 calc R . . 
C53 C 0.7136(4) 0.43878(18) 0.53138(17) 0.0207(8) Uani 1 1 d . . . 
H53A H 0.6552 0.4782 0.5451 0.025 Uiso 1 1 calc R . . 
C61 C 0.9727(4) -0.0292(2) 0.68260(18) 0.0302(10) Uani 1 1 d . . . 
H61A H 0.9747 -0.0844 0.6850 0.045 Uiso 1 1 calc R . . 
H61B H 0.9499 -0.0084 0.7229 0.045 Uiso 1 1 calc R . . 
H61C H 1.0663 -0.0106 0.6726 0.045 Uiso 1 1 calc R . . 
C63 C 0.6918(4) 0.36535(19) 0.55214(17) 0.0189(8) Uani 1 1 d . . . 
C71 C 0.8994(4) -0.04273(19) 0.57165(17) 0.0245(9) Uani 1 1 d . . . 
H71A H 0.9114 -0.0971 0.5790 0.037 Uiso 1 1 calc R . . 
H71B H 0.9889 -0.0213 0.5593 0.037 Uiso 1 1 calc R . . 
H71C H 0.8236 -0.0344 0.5382 0.037 Uiso 1 1 calc R . . 
C73 C 0.9734(3) 0.2624(2) 0.46295(16) 0.0201(8) Uani 1 1 d . . . 
H73A H 0.9398 0.2126 0.4781 0.024 Uiso 1 1 calc R . . 
C81 C 0.7160(4) -0.03510(19) 0.64960(18) 0.0251(9) Uani 1 1 d . . . 
H81A H 0.7215 -0.0902 0.6535 0.038 Uiso 1 1 calc R . . 
H81B H 0.6407 -0.0216 0.6172 0.038 Uiso 1 1 calc R . . 
H81C H 0.6941 -0.0131 0.6896 0.038 Uiso 1 1 calc R . . 
C83 C 1.1289(4) 0.2719(2) 0.4874(2) 0.0347(10) Uani 1 1 d . . . 
H83A H 1.1368 0.2702 0.5332 0.052 Uiso 1 1 calc R . . 
H83B H 1.1643 0.3206 0.4735 0.052 Uiso 1 1 calc R . . 
H83C H 1.1857 0.2310 0.4713 0.052 Uiso 1 1 calc R . . 
C91 C 0.5664(4) 0.23708(19) 0.44546(16) 0.0235(8) Uani 1 1 d . . . 
H91A H 0.4966 0.2267 0.4101 0.035 Uiso 1 1 calc R . . 
H91B H 0.6511 0.2608 0.4302 0.035 Uiso 1 1 calc R . . 
H91C H 0.5243 0.2712 0.4748 0.035 Uiso 1 1 calc R . . 
C93 C 0.9589(4) 0.2608(2) 0.39170(16) 0.0263(9) Uani 1 1 d . . . 
H93A H 0.8585 0.2535 0.3768 0.039 Uiso 1 1 calc R . . 
H93B H 1.0159 0.2191 0.3769 0.039 Uiso 1 1 calc R . . 
H93C H 0.9929 0.3087 0.3756 0.039 Uiso 1 1 calc R . . 
C101 C 0.4704(4) 0.1282(2) 0.49841(17) 0.0232(8) Uani 1 1 d . . . 
H10A H 0.4003 0.1251 0.4621 0.035 Uiso 1 1 calc R . . 
H10B H 0.4324 0.1598 0.5306 0.035 Uiso 1 1 calc R . . 
H10C H 0.4898 0.0774 0.5152 0.035 Uiso 1 1 calc R . . 
C103 C 0.5769(4) 0.34928(19) 0.59584(17) 0.0222(8) Uani 1 1 d . . . 
H10E H 0.5674 0.2932 0.5995 0.027 Uiso 1 1 calc R . . 
C111 C 0.6701(4) 0.1114(2) 0.42974(17) 0.0235(9) Uani 1 1 d . . . 
H11A H 0.6001 0.1060 0.3936 0.035 Uiso 1 1 calc R . . 
H11B H 0.6914 0.0617 0.4482 0.035 Uiso 1 1 calc R . . 
H11C H 0.7579 0.1337 0.4163 0.035 Uiso 1 1 calc R . . 
C113 C 0.6176(4) 0.3810(2) 0.66109(18) 0.0301(9) Uani 1 1 d . . . 
H11G H 0.7103 0.3605 0.6771 0.045 Uiso 1 1 calc R . . 
H11H H 0.5451 0.3666 0.6891 0.045 Uiso 1 1 calc R . . 
H11I H 0.6235 0.4362 0.6589 0.045 Uiso 1 1 calc R . . 
C123 C 0.4320(4) 0.3811(2) 0.5714(2) 0.0325(10) Uani 1 1 d . . . 
H12D H 0.4085 0.3637 0.5285 0.049 Uiso 1 1 calc R . . 
H12E H 0.4357 0.4364 0.5722 0.049 Uiso 1 1 calc R . . 
H12F H 0.3589 0.3635 0.5980 0.049 Uiso 1 1 calc R . . 
  
loop_ 
 _atom_site_aniso_label 
 _atom_site_aniso_U_11 
 _atom_site_aniso_U_22 
 _atom_site_aniso_U_33 
 _atom_site_aniso_U_23 
 _atom_site_aniso_U_13 
 _atom_site_aniso_U_12 
Co1 0.0237(3) 0.0157(2) 0.0227(3) -0.0016(2) -0.00556(19) -0.0023(2) 
O1 0.0251(14) 0.0229(14) 0.0252(16) -0.0048(11) -0.0026(11) -0.0055(11) 
C1 0.024(2) 0.021(2) 0.042(3) -0.0043(18) -0.0023(18) -0.0036(16) 
C2 0.037(3) 0.027(2) 0.047(3) -0.010(2) 0.002(2) -0.0057(19) 
C3 0.028(2) 0.028(2) 0.041(3) -0.0128(19) -0.0035(19) -0.0017(18) 
C4 0.031(2) 0.031(2) 0.026(2) -0.0081(18) -0.0024(18) -0.0033(18) 
N11 0.0155(15) 0.0143(14) 0.0152(16) 0.0003(12) -0.0025(12) -0.0007(12) 
N21 0.0148(14) 0.0147(14) 0.0153(15) 0.0009(12) -0.0006(11) -0.0006(12) 
C11 0.024(2) 0.0125(17) 0.021(2) 0.0013(15) -0.0033(16) -0.0009(14) 
C21 0.0157(17) 0.0127(17) 0.0168(19) -0.0003(15) 0.0008(14) -0.0008(14) 
C31 0.0170(18) 0.0138(17) 0.017(2) -0.0026(15) -0.0014(15) -0.0030(14) 
C41 0.0157(18) 0.0173(18) 0.017(2) -0.0019(15) 0.0030(14) 0.0011(15) 
C51 0.0205(19) 0.0176(18) 0.019(2) -0.0014(16) -0.0008(15) -0.0008(15) 
C12 0.0227(19) 0.0091(16) 0.016(2) -0.0009(14) -0.0017(15) 0.0008(14) 
C22 0.0207(19) 0.0123(17) 0.021(2) -0.0003(15) 0.0007(16) -0.0014(14) 
C32 0.024(2) 0.0198(19) 0.017(2) 0.0002(16) 0.0035(16) 0.0004(16) 
C42 0.025(2) 0.0212(19) 0.016(2) -0.0016(16) -0.0062(16) 0.0003(16) 
C52 0.0108(18) 0.0205(18) 0.024(2) -0.0015(16) 0.0011(15) 0.0040(14) 
C62 0.0209(19) 0.0103(16) 0.016(2) -0.0019(14) 0.0018(15) -0.0004(14) 
C72 0.0202(19) 0.0226(19) 0.021(2) 0.0000(16) 0.0009(16) -0.0029(16) 
C82 0.026(2) 0.030(2) 0.042(3) 0.0063(19) 0.0079(19) 0.0066(17) 
C92 0.020(2) 0.026(2) 0.035(2) -0.0002(18) 0.0065(17) 0.0001(17) 
C102 0.0191(19) 0.0198(18) 0.0130(19) 0.0017(15) 0.0021(15) 0.0019(15) 
C112 0.032(2) 0.0184(19) 0.030(2) 0.0006(17) 0.0076(18) 0.0017(16) 
C122 0.039(2) 0.022(2) 0.028(2) 0.0062(17) 0.0144(19) 0.0079(18) 
C13 0.0147(18) 0.0152(17) 0.018(2) 0.0010(15) -0.0059(15) -0.0034(14) 
C23 0.0171(18) 0.0138(17) 0.0147(19) -0.0018(14) -0.0042(15) -0.0025(14) 
C33 0.0184(19) 0.0240(19) 0.019(2) 0.0029(16) -0.0042(15) -0.0072(15) 
C43 0.022(2) 0.0157(18) 0.027(2) 0.0054(16) -0.0036(17) -0.0054(15) 
C53 0.020(2) 0.0147(18) 0.027(2) -0.0012(16) -0.0016(16) 0.0042(15) 
C61 0.043(2) 0.0153(19) 0.030(2) -0.0003(17) -0.0150(19) 0.0010(17) 
C63 0.0161(19) 0.0189(18) 0.021(2) -0.0010(16) -0.0042(15) -0.0010(15) 
C71 0.030(2) 0.0158(18) 0.028(2) 0.0017(16) 0.0025(18) 0.0016(16) 
C73 0.0177(18) 0.0193(18) 0.023(2) 0.0018(16) 0.0030(15) 0.0013(15) 
C81 0.029(2) 0.0168(18) 0.029(2) 0.0027(16) 0.0036(17) -0.0048(16) 
C83 0.024(2) 0.037(2) 0.042(3) -0.006(2) -0.0034(18) 0.0048(18) 
C91 0.027(2) 0.0191(18) 0.022(2) 0.0039(16) -0.0099(16) -0.0054(16) 
C93 0.031(2) 0.025(2) 0.023(2) 0.0005(18) 0.0087(16) 0.0026(18) 
C101 0.024(2) 0.027(2) 0.019(2) -0.0010(17) 0.0004(16) -0.0009(16) 
C103 0.022(2) 0.0153(18) 0.029(2) -0.0018(16) 0.0040(17) 0.0012(15) 
C111 0.026(2) 0.025(2) 0.019(2) -0.0001(16) -0.0022(16) -0.0046(16) 
C113 0.029(2) 0.032(2) 0.030(2) 0.0019(19) 0.0087(18) 0.0042(18) 
C123 0.024(2) 0.031(2) 0.044(3) -0.004(2) 0.0067(19) 0.0006(17) 
  
_geom_special_details 
; 
 All esds (except the esd in the dihedral angle between two l.s. planes) 
 are estimated using the full covariance matrix.  The cell esds are taken 
 into account individually in the estimation of esds in distances, angles 
 and torsion angles; correlations between esds in cell parameters are only 
 used when they are defined by crystal symmetry.  An approximate (isotropic) 
 treatment of cell esds is used for estimating esds involving l.s. planes. 
; 
  
loop_ 
 _geom_bond_atom_site_label_1 
 _geom_bond_atom_site_label_2 
 _geom_bond_distance 
 _geom_bond_site_symmetry_2 
 _geom_bond_publ_flag 
Co1 N21 1.881(3) . ? 
Co1 N11 1.902(3) . ? 
Co1 O1 2.002(2) . ? 
O1 C4 1.453(4) . ? 
O1 C1 1.456(4) . ? 
C1 C2 1.507(5) . ? 
C1 H1A 0.9900 . ? 
C1 H1B 0.9900 . ? 
C2 C3 1.524(5) . ? 
C2 H2A 0.9900 . ? 
C2 H2B 0.9900 . ? 
C3 C4 1.510(5) . ? 
C3 H3A 0.9900 . ? 
C3 H3B 0.9900 . ? 
C4 H4A 0.9900 . ? 
C4 H4B 0.9900 . ? 
N11 C21 1.345(4) . ? 
N11 C12 1.418(4) . ? 
N21 C41 1.337(4) . ? 
N21 C13 1.429(4) . ? 
C11 C61 1.529(5) . ? 
C11 C71 1.530(5) . ? 
C11 C81 1.532(5) . ? 
C11 C21 1.572(4) . ? 
C21 C31 1.403(4) . ? 
C31 C41 1.402(4) . ? 
C31 H31A 0.9500 . ? 
C41 C51 1.545(5) . ? 
C51 C91 1.529(5) . ? 
C51 C101 1.536(5) . ? 
C51 C111 1.538(5) . ? 
C12 C62 1.413(5) . ? 
C12 C22 1.413(5) . ? 
C22 C32 1.380(5) . ? 
C22 C72 1.525(5) . ? 
C32 C42 1.379(5) . ? 
C32 H32A 0.9500 . ? 
C42 C52 1.375(5) . ? 
C42 H42A 0.9500 . ? 
C52 C62 1.396(5) . ? 
C52 H52A 0.9500 . ? 
C62 C102 1.525(5) . ? 
C72 C92 1.523(5) . ? 
C72 C82 1.523(5) . ? 
C72 H72A 1.0000 . ? 
C82 H82A 0.9800 . ? 
C82 H82B 0.9800 . ? 
C82 H82C 0.9800 . ? 
C92 H92A 0.9800 . ? 
C92 H92B 0.9800 . ? 
C92 H92C 0.9800 . ? 
C102 C112 1.519(5) . ? 
C102 C122 1.526(5) . ? 
C102 H10D 1.0000 . ? 
C112 H11D 0.9800 . ? 
C112 H11E 0.9800 . ? 
C112 H11F 0.9800 . ? 
C122 H12A 0.9800 . ? 
C122 H12B 0.9800 . ? 
C122 H12C 0.9800 . ? 
C13 C23 1.401(5) . ? 
C13 C63 1.410(5) . ? 
C23 C33 1.394(5) . ? 
C23 C73 1.525(5) . ? 
C33 C43 1.384(5) . ? 
C33 H33A 0.9500 . ? 
C43 C53 1.377(5) . ? 
C43 H43A 0.9500 . ? 
C53 C63 1.395(5) . ? 
C53 H53A 0.9500 . ? 
C61 H61A 0.9800 . ? 
C61 H61B 0.9800 . ? 
C61 H61C 0.9800 . ? 
C63 C103 1.516(5) . ? 
C71 H71A 0.9800 . ? 
C71 H71B 0.9800 . ? 
C71 H71C 0.9800 . ? 
C73 C83 1.522(5) . ? 
C73 C93 1.525(5) . ? 
C73 H73A 1.0000 . ? 
C81 H81A 0.9800 . ? 
C81 H81B 0.9800 . ? 
C81 H81C 0.9800 . ? 
C83 H83A 0.9800 . ? 
C83 H83B 0.9800 . ? 
C83 H83C 0.9800 . ? 
C91 H91A 0.9800 . ? 
C91 H91B 0.9800 . ? 
C91 H91C 0.9800 . ? 
C93 H93A 0.9800 . ? 
C93 H93B 0.9800 . ? 
C93 H93C 0.9800 . ? 
C101 H10A 0.9800 . ? 
C101 H10B 0.9800 . ? 
C101 H10C 0.9800 . ? 
C103 C123 1.527(5) . ? 
C103 C113 1.528(5) . ? 
C103 H10E 1.0000 . ? 
C111 H11A 0.9800 . ? 
C111 H11B 0.9800 . ? 
C111 H11C 0.9800 . ? 
C113 H11G 0.9800 . ? 
C113 H11H 0.9800 . ? 
C113 H11I 0.9800 . ? 
C123 H12D 0.9800 . ? 
C123 H12E 0.9800 . ? 
C123 H12F 0.9800 . ? 
  
loop_ 
 _geom_angle_atom_site_label_1 
 _geom_angle_atom_site_label_2 
 _geom_angle_atom_site_label_3 
 _geom_angle 
 _geom_angle_site_symmetry_1 
 _geom_angle_site_symmetry_3 
 _geom_angle_publ_flag 
N21 Co1 N11 99.46(11) . . ? 
N21 Co1 O1 135.25(11) . . ? 
N11 Co1 O1 125.02(11) . . ? 
C4 O1 C1 109.5(3) . . ? 
C4 O1 Co1 130.1(2) . . ? 
C1 O1 Co1 119.2(2) . . ? 
O1 C1 C2 105.9(3) . . ? 
O1 C1 H1A 110.6 . . ? 
C2 C1 H1A 110.6 . . ? 
O1 C1 H1B 110.6 . . ? 
C2 C1 H1B 110.6 . . ? 
H1A C1 H1B 108.7 . . ? 
C1 C2 C3 103.6(3) . . ? 
C1 C2 H2A 111.0 . . ? 
C3 C2 H2A 111.0 . . ? 
C1 C2 H2B 111.0 . . ? 
C3 C2 H2B 111.0 . . ? 
H2A C2 H2B 109.0 . . ? 
C4 C3 C2 101.9(3) . . ? 
C4 C3 H3A 111.4 . . ? 
C2 C3 H3A 111.4 . . ? 
C4 C3 H3B 111.4 . . ? 
C2 C3 H3B 111.4 . . ? 
H3A C3 H3B 109.3 . . ? 
O1 C4 C3 104.3(3) . . ? 
O1 C4 H4A 110.9 . . ? 
C3 C4 H4A 110.9 . . ? 
O1 C4 H4B 110.9 . . ? 
C3 C4 H4B 110.9 . . ? 
H4A C4 H4B 108.9 . . ? 
C21 N11 C12 126.4(3) . . ? 
C21 N11 Co1 122.5(2) . . ? 
C12 N11 Co1 110.7(2) . . ? 
C41 N21 C13 129.9(3) . . ? 
C41 N21 Co1 124.4(2) . . ? 
C13 N21 Co1 104.94(19) . . ? 
C61 C11 C71 105.6(3) . . ? 
C61 C11 C81 107.1(3) . . ? 
C71 C11 C81 109.8(3) . . ? 
C61 C11 C21 116.8(3) . . ? 
C71 C11 C21 108.2(3) . . ? 
C81 C11 C21 109.2(3) . . ? 
N11 C21 C31 120.9(3) . . ? 
N11 C21 C11 124.9(3) . . ? 
C31 C21 C11 114.2(3) . . ? 
C41 C31 C21 132.7(3) . . ? 
C41 C31 H31A 113.6 . . ? 
C21 C31 H31A 113.6 . . ? 
N21 C41 C31 119.9(3) . . ? 
N21 C41 C51 125.7(3) . . ? 
C31 C41 C51 114.4(3) . . ? 
C91 C51 C101 106.1(3) . . ? 
C91 C51 C111 106.8(3) . . ? 
C101 C51 C111 108.9(3) . . ? 
C91 C51 C41 115.8(3) . . ? 
C101 C51 C41 109.3(3) . . ? 
C111 C51 C41 109.6(3) . . ? 
C62 C12 C22 120.0(3) . . ? 
C62 C12 N11 120.2(3) . . ? 
C22 C12 N11 119.4(3) . . ? 
C32 C22 C12 118.8(3) . . ? 
C32 C22 C72 120.3(3) . . ? 
C12 C22 C72 120.8(3) . . ? 
C42 C32 C22 121.8(3) . . ? 
C42 C32 H32A 119.1 . . ? 
C22 C32 H32A 119.1 . . ? 
C52 C42 C32 119.4(3) . . ? 
C52 C42 H42A 120.3 . . ? 
C32 C42 H42A 120.3 . . ? 
C42 C52 C62 121.7(3) . . ? 
C42 C52 H52A 119.2 . . ? 
C62 C52 H52A 119.2 . . ? 
C52 C62 C12 118.2(3) . . ? 
C52 C62 C102 119.6(3) . . ? 
C12 C62 C102 122.1(3) . . ? 
C92 C72 C82 110.9(3) . . ? 
C92 C72 C22 113.1(3) . . ? 
C82 C72 C22 109.7(3) . . ? 
C92 C72 H72A 107.6 . . ? 
C82 C72 H72A 107.6 . . ? 
C22 C72 H72A 107.6 . . ? 
C72 C82 H82A 109.5 . . ? 
C72 C82 H82B 109.5 . . ? 
H82A C82 H82B 109.5 . . ? 
C72 C82 H82C 109.5 . . ? 
H82A C82 H82C 109.5 . . ? 
H82B C82 H82C 109.5 . . ? 
C72 C92 H92A 109.5 . . ? 
C72 C92 H92B 109.5 . . ? 
H92A C92 H92B 109.5 . . ? 
C72 C92 H92C 109.5 . . ? 
H92A C92 H92C 109.5 . . ? 
H92B C92 H92C 109.5 . . ? 
C112 C102 C62 110.4(3) . . ? 
C112 C102 C122 109.4(3) . . ? 
C62 C102 C122 112.6(3) . . ? 
C112 C102 H10D 108.1 . . ? 
C62 C102 H10D 108.1 . . ? 
C122 C102 H10D 108.1 . . ? 
C102 C112 H11D 109.5 . . ? 
C102 C112 H11E 109.5 . . ? 
H11D C112 H11E 109.5 . . ? 
C102 C112 H11F 109.5 . . ? 
H11D C112 H11F 109.5 . . ? 
H11E C112 H11F 109.5 . . ? 
C102 C122 H12A 109.5 . . ? 
C102 C122 H12B 109.5 . . ? 
H12A C122 H12B 109.5 . . ? 
C102 C122 H12C 109.5 . . ? 
H12A C122 H12C 109.5 . . ? 
H12B C122 H12C 109.5 . . ? 
C23 C13 C63 120.5(3) . . ? 
C23 C13 N21 119.4(3) . . ? 
C63 C13 N21 119.5(3) . . ? 
C33 C23 C13 118.9(3) . . ? 
C33 C23 C73 119.1(3) . . ? 
C13 C23 C73 122.0(3) . . ? 
C43 C33 C23 121.5(3) . . ? 
C43 C33 H33A 119.3 . . ? 
C23 C33 H33A 119.3 . . ? 
C53 C43 C33 118.8(3) . . ? 
C53 C43 H43A 120.6 . . ? 
C33 C43 H43A 120.6 . . ? 
C43 C53 C63 122.4(3) . . ? 
C43 C53 H53A 118.8 . . ? 
C63 C53 H53A 118.8 . . ? 
C11 C61 H61A 109.5 . . ? 
C11 C61 H61B 109.5 . . ? 
H61A C61 H61B 109.5 . . ? 
C11 C61 H61C 109.5 . . ? 
H61A C61 H61C 109.5 . . ? 
H61B C61 H61C 109.5 . . ? 
C53 C63 C13 117.9(3) . . ? 
C53 C63 C103 120.3(3) . . ? 
C13 C63 C103 121.9(3) . . ? 
C11 C71 H71A 109.5 . . ? 
C11 C71 H71B 109.5 . . ? 
H71A C71 H71B 109.5 . . ? 
C11 C71 H71C 109.5 . . ? 
H71A C71 H71C 109.5 . . ? 
H71B C71 H71C 109.5 . . ? 
C83 C73 C23 111.0(3) . . ? 
C83 C73 C93 110.6(3) . . ? 
C23 C73 C93 111.8(3) . . ? 
C83 C73 H73A 107.8 . . ? 
C23 C73 H73A 107.8 . . ? 
C93 C73 H73A 107.8 . . ? 
C11 C81 H81A 109.5 . . ? 
C11 C81 H81B 109.5 . . ? 
H81A C81 H81B 109.5 . . ? 
C11 C81 H81C 109.5 . . ? 
H81A C81 H81C 109.5 . . ? 
H81B C81 H81C 109.5 . . ? 
C73 C83 H83A 109.5 . . ? 
C73 C83 H83B 109.5 . . ? 
H83A C83 H83B 109.5 . . ? 
C73 C83 H83C 109.5 . . ? 
H83A C83 H83C 109.5 . . ? 
H83B C83 H83C 109.5 . . ? 
C51 C91 H91A 109.5 . . ? 
C51 C91 H91B 109.5 . . ? 
H91A C91 H91B 109.5 . . ? 
C51 C91 H91C 109.5 . . ? 
H91A C91 H91C 109.5 . . ? 
H91B C91 H91C 109.5 . . ? 
C73 C93 H93A 109.5 . . ? 
C73 C93 H93B 109.5 . . ? 
H93A C93 H93B 109.5 . . ? 
C73 C93 H93C 109.5 . . ? 
H93A C93 H93C 109.5 . . ? 
H93B C93 H93C 109.5 . . ? 
C51 C101 H10A 109.5 . . ? 
C51 C101 H10B 109.5 . . ? 
H10A C101 H10B 109.5 . . ? 
C51 C101 H10C 109.5 . . ? 
H10A C101 H10C 109.5 . . ? 
H10B C101 H10C 109.5 . . ? 
C63 C103 C123 112.4(3) . . ? 
C63 C103 C113 111.2(3) . . ? 
C123 C103 C113 109.1(3) . . ? 
C63 C103 H10E 108.0 . . ? 
C123 C103 H10E 108.0 . . ? 
C113 C103 H10E 108.0 . . ? 
C51 C111 H11A 109.5 . . ? 
C51 C111 H11B 109.5 . . ? 
H11A C111 H11B 109.5 . . ? 
C51 C111 H11C 109.5 . . ? 
H11A C111 H11C 109.5 . . ? 
H11B C111 H11C 109.5 . . ? 
C103 C113 H11G 109.5 . . ? 
C103 C113 H11H 109.5 . . ? 
H11G C113 H11H 109.5 . . ? 
C103 C113 H11I 109.5 . . ? 
H11G C113 H11I 109.5 . . ? 
H11H C113 H11I 109.5 . . ? 
C103 C123 H12D 109.5 . . ? 
C103 C123 H12E 109.5 . . ? 
H12D C123 H12E 109.5 . . ? 
C103 C123 H12F 109.5 . . ? 
H12D C123 H12F 109.5 . . ? 
H12E C123 H12F 109.5 . . ? 
  
loop_ 
 _geom_torsion_atom_site_label_1 
 _geom_torsion_atom_site_label_2 
 _geom_torsion_atom_site_label_3 
 _geom_torsion_atom_site_label_4 
 _geom_torsion 
 _geom_torsion_site_symmetry_1 
 _geom_torsion_site_symmetry_2 
 _geom_torsion_site_symmetry_3 
 _geom_torsion_site_symmetry_4 
 _geom_torsion_publ_flag 
N21 Co1 O1 C4 157.7(3) . . . . ? 
N11 Co1 O1 C4 -15.0(3) . . . . ? 
N21 Co1 O1 C1 -36.1(3) . . . . ? 
N11 Co1 O1 C1 151.2(2) . . . . ? 
C4 O1 C1 C2 -0.3(4) . . . . ? 
Co1 O1 C1 C2 -169.1(2) . . . . ? 
O1 C1 C2 C3 23.3(4) . . . . ? 
C1 C2 C3 C4 -36.5(4) . . . . ? 
C1 O1 C4 C3 -23.1(4) . . . . ? 
Co1 O1 C4 C3 144.1(2) . . . . ? 
C2 C3 C4 O1 36.6(4) . . . . ? 
N21 Co1 N11 C21 1.6(3) . . . . ? 
O1 Co1 N11 C21 176.4(2) . . . . ? 
N21 Co1 N11 C12 -171.5(2) . . . . ? 
O1 Co1 N11 C12 3.2(3) . . . . ? 
N11 Co1 N21 C41 0.7(3) . . . . ? 
O1 Co1 N21 C41 -173.3(2) . . . . ? 
N11 Co1 N21 C13 -170.0(2) . . . . ? 
O1 Co1 N21 C13 16.0(3) . . . . ? 
C12 N11 C21 C31 168.1(3) . . . . ? 
Co1 N11 C21 C31 -3.9(5) . . . . ? 
C12 N11 C21 C11 -13.3(5) . . . . ? 
Co1 N11 C21 C11 174.7(2) . . . . ? 
C61 C11 C21 N11 -6.1(5) . . . . ? 
C71 C11 C21 N11 -125.0(3) . . . . ? 
C81 C11 C21 N11 115.5(4) . . . . ? 
C61 C11 C21 C31 172.6(3) . . . . ? 
C71 C11 C21 C31 53.7(4) . . . . ? 
C81 C11 C21 C31 -65.8(4) . . . . ? 
N11 C21 C31 C41 4.8(6) . . . . ? 
C11 C21 C31 C41 -173.9(3) . . . . ? 
C13 N21 C41 C31 167.8(3) . . . . ? 
Co1 N21 C41 C31 -0.5(4) . . . . ? 
C13 N21 C41 C51 -13.4(6) . . . . ? 
Co1 N21 C41 C51 178.3(3) . . . . ? 
C21 C31 C41 N21 -2.3(6) . . . . ? 
C21 C31 C41 C51 178.7(4) . . . . ? 
N21 C41 C51 C91 -0.5(5) . . . . ? 
C31 C41 C51 C91 178.4(3) . . . . ? 
N21 C41 C51 C101 -120.2(4) . . . . ? 
C31 C41 C51 C101 58.6(4) . . . . ? 
N21 C41 C51 C111 120.4(4) . . . . ? 
C31 C41 C51 C111 -60.7(4) . . . . ? 
C21 N11 C12 C62 105.7(4) . . . . ? 
Co1 N11 C12 C62 -81.5(3) . . . . ? 
C21 N11 C12 C22 -80.7(4) . . . . ? 
Co1 N11 C12 C22 92.1(3) . . . . ? 
C62 C12 C22 C32 -1.8(5) . . . . ? 
N11 C12 C22 C32 -175.5(3) . . . . ? 
C62 C12 C22 C72 174.0(3) . . . . ? 
N11 C12 C22 C72 0.3(5) . . . . ? 
C12 C22 C32 C42 0.4(5) . . . . ? 
C72 C22 C32 C42 -175.5(3) . . . . ? 
C22 C32 C42 C52 1.4(5) . . . . ? 
C32 C42 C52 C62 -1.8(5) . . . . ? 
C42 C52 C62 C12 0.4(5) . . . . ? 
C42 C52 C62 C102 179.6(3) . . . . ? 
C22 C12 C62 C52 1.4(5) . . . . ? 
N11 C12 C62 C52 175.0(3) . . . . ? 
C22 C12 C62 C102 -177.8(3) . . . . ? 
N11 C12 C62 C102 -4.2(5) . . . . ? 
C32 C22 C72 C92 -42.4(4) . . . . ? 
C12 C22 C72 C92 141.8(3) . . . . ? 
C32 C22 C72 C82 82.0(4) . . . . ? 
C12 C22 C72 C82 -93.8(4) . . . . ? 
C52 C62 C102 C112 -73.8(4) . . . . ? 
C12 C62 C102 C112 105.4(4) . . . . ? 
C52 C62 C102 C122 48.8(4) . . . . ? 
C12 C62 C102 C122 -132.0(3) . . . . ? 
C41 N21 C13 C23 -82.5(4) . . . . ? 
Co1 N21 C13 C23 87.5(3) . . . . ? 
C41 N21 C13 C63 105.9(4) . . . . ? 
Co1 N21 C13 C63 -84.1(3) . . . . ? 
C63 C13 C23 C33 3.2(5) . . . . ? 
N21 C13 C23 C33 -168.3(3) . . . . ? 
C63 C13 C23 C73 -177.9(3) . . . . ? 
N21 C13 C23 C73 10.5(5) . . . . ? 
C13 C23 C33 C43 -2.3(5) . . . . ? 
C73 C23 C33 C43 178.8(3) . . . . ? 
C23 C33 C43 C53 0.0(5) . . . . ? 
C33 C43 C53 C63 1.4(5) . . . . ? 
C43 C53 C63 C13 -0.5(5) . . . . ? 
C43 C53 C63 C103 179.9(3) . . . . ? 
C23 C13 C63 C53 -1.9(5) . . . . ? 
N21 C13 C63 C53 169.6(3) . . . . ? 
C23 C13 C63 C103 177.7(3) . . . . ? 
N21 C13 C63 C103 -10.8(5) . . . . ? 
C33 C23 C73 C83 66.7(4) . . . . ? 
C13 C23 C73 C83 -112.2(4) . . . . ? 
C33 C23 C73 C93 -57.3(4) . . . . ? 
C13 C23 C73 C93 123.8(3) . . . . ? 
C53 C63 C103 C123 51.8(4) . . . . ? 
C13 C63 C103 C123 -127.8(3) . . . . ? 
C53 C63 C103 C113 -70.9(4) . . . . ? 
C13 C63 C103 C113 109.5(4) . . . . ? 
  
_diffrn_measured_fraction_theta_max    1.000 
_diffrn_reflns_theta_full              26.37 
_diffrn_measured_fraction_theta_full   1.000 
_refine_diff_density_max    0.399 
_refine_diff_density_min   -0.460 
_refine_diff_density_rms    0.076 
#===END
_publ_section_references
;
Bruker (2009). SAINT V7.68A, Bruker AXS, Inc., Madison, WI, USA.

Bruker (2009). APEX2 V2009.9-0, Bruker AXS, Inc., Madison, WI, USA.

Sheldrick, G. M. (2008). SADABS V2008/1, University of G\"ottingen, Germany.

Sheldrick, G. M. (2008). Acta. Cryst. A64, 112-122.
;
 
data_L(tBu)Co 
  
_audit_creation_method            SHELXL-97 
_chemical_name_systematic 
; 
 ? 
; 
_chemical_name_common             L(tBu)Co 
_chemical_melting_point           ? 
_chemical_formula_moiety          'C35 H53 Co N2' 
_chemical_formula_sum 
 'C35 H53 Co N2' 
_chemical_formula_weight          560.72 
  
loop_ 
 _atom_type_symbol 
 _atom_type_description 
 _atom_type_scat_dispersion_real 
 _atom_type_scat_dispersion_imag 
 _atom_type_scat_source 
 'C'  'C'   0.0033   0.0016 
 'International Tables Vol C Tables 4.2.6.8 and 6.1.1.4' 
 'H'  'H'   0.0000   0.0000 
 'International Tables Vol C Tables 4.2.6.8 and 6.1.1.4' 
 'N'  'N'   0.0061   0.0033 
 'International Tables Vol C Tables 4.2.6.8 and 6.1.1.4' 
 'Co'  'Co'   0.3494   0.9721 
 'International Tables Vol C Tables 4.2.6.8 and 6.1.1.4' 
  
_symmetry_cell_setting            monoclinic 
_symmetry_space_group_name_H-M    'P 1 21/n 1' 
  
loop_ 
 _symmetry_equiv_pos_as_xyz 
 'x, y, z' 
 '-x+1/2, y+1/2, -z+1/2' 
 '-x, -y, -z' 
 'x-1/2, -y-1/2, z-1/2' 
  
_cell_length_a                    12.0637(14) 
_cell_length_b                    14.4861(16) 
_cell_length_c                    18.320(2) 
_cell_angle_alpha                 90.00 
_cell_angle_beta                  104.359(2) 
_cell_angle_gamma                 90.00 
_cell_volume                      3101.5(6) 
_cell_formula_units_Z             4 
_cell_measurement_temperature     100.0(1) 
_cell_measurement_reflns_used     3936 
_cell_measurement_theta_min       2.81 
_cell_measurement_theta_max       37.17 
  
_exptl_crystal_description        block 
_exptl_crystal_colour             'dark orange' 
_exptl_crystal_size_max           0.38 
_exptl_crystal_size_mid           0.20 
_exptl_crystal_size_min           0.12 
_exptl_crystal_density_meas       ? 
_exptl_crystal_density_diffrn     1.201 
_exptl_crystal_density_method     'not measured' 
_exptl_crystal_F_000              1216 
_exptl_absorpt_coefficient_mu     0.578 
_exptl_absorpt_correction_type    multi-scan 
_exptl_absorpt_correction_T_min   0.8102 
_exptl_absorpt_correction_T_max   0.9338 
_exptl_absorpt_process_details    'SADABS (Sheldrick, 2008)' 
  
_exptl_special_details 
; 
 ? 
; 
  
_diffrn_ambient_temperature       100.0(1) 
_diffrn_radiation_wavelength      0.71073 
_diffrn_radiation_type            MoK\a 
_diffrn_radiation_source          'fine-focus sealed tube' 
_diffrn_radiation_monochromator   graphite 
_diffrn_measurement_device_type   'Bruker SMART APEX II CCD Platform' 
_diffrn_measurement_method        'area detector, \w scans per \f' 
_diffrn_detector_area_resol_mean  ? 
_diffrn_standards_number          0 
_diffrn_standards_interval_count  ? 
_diffrn_standards_interval_time   ? 
_diffrn_standards_decay_%         ? 
_diffrn_reflns_number             98442 
_diffrn_reflns_av_R_equivalents   0.0573 
_diffrn_reflns_av_sigmaI/netI     0.0421 
_diffrn_reflns_limit_h_min        -20 
_diffrn_reflns_limit_h_max        20 
_diffrn_reflns_limit_k_min        -24 
_diffrn_reflns_limit_k_max        24 
_diffrn_reflns_limit_l_min        -31 
_diffrn_reflns_limit_l_max        31 
_diffrn_reflns_theta_min          1.81 
_diffrn_reflns_theta_max          37.78 
_reflns_number_total              16438 
_reflns_number_gt                 12449 
_reflns_threshold_expression      >2sigma(I) 
  
_computing_data_collection        'APEX2 (Bruker, 2009)' 
_computing_cell_refinement        'SAINT (Bruker, 2009)' 
_computing_data_reduction         'SAINT (Bruker, 2009)' 
_computing_structure_solution     'SHELXS-97 (Sheldrick, 2008)' 
_computing_structure_refinement   'SHELXL-97 (Sheldrick, 2008)' 
_computing_molecular_graphics     'SHELXTL (Sheldrick, 2008)' 
_computing_publication_material   'SHELXTL (Sheldrick, 2008)' 
  
_refine_special_details 
; 
 Refinement of F^2^ against ALL reflections.  The weighted R-factor wR and 
 goodness of fit S are based on F^2^, conventional R-factors R are based 
 on F, with F set to zero for negative F^2^. The threshold expression of 
 F^2^ > 2sigma(F^2^) is used only for calculating R-factors(gt) etc. and is 
 not relevant to the choice of reflections for refinement.  R-factors based 
 on F^2^ are statistically about twice as large as those based on F, and R- 
 factors based on ALL data will be even larger. 
; 
  
_refine_ls_structure_factor_coef  Fsqd 
_refine_ls_matrix_type            full 
_refine_ls_weighting_scheme       calc 
_refine_ls_weighting_details 
 'calc w=1/[\s^2^(Fo^2^)+(0.0473P)^2^+0.9320P] where P=(Fo^2^+2Fc^2^)/3' 
_atom_sites_solution_primary      heavy 
_atom_sites_solution_secondary    difmap 
_atom_sites_solution_hydrogens    geom 
_refine_ls_hydrogen_treatment     constr 
_refine_ls_extinction_method      none 
_refine_ls_extinction_coef        ? 
_refine_ls_number_reflns          16438 
_refine_ls_number_parameters      357 
_refine_ls_number_restraints      0 
_refine_ls_R_factor_all           0.0644 
_refine_ls_R_factor_gt            0.0425 
_refine_ls_wR_factor_ref          0.1076 
_refine_ls_wR_factor_gt           0.0989 
_refine_ls_goodness_of_fit_ref    1.036 
_refine_ls_restrained_S_all       1.036 
_refine_ls_shift/su_max           0.001 
_refine_ls_shift/su_mean          0.000 
  
loop_ 
 _atom_site_label 
 _atom_site_type_symbol 
 _atom_site_fract_x 
 _atom_site_fract_y 
 _atom_site_fract_z 
 _atom_site_U_iso_or_equiv 
 _atom_site_adp_type 
 _atom_site_occupancy 
 _atom_site_symmetry_multiplicity 
 _atom_site_calc_flag 
 _atom_site_refinement_flags 
 _atom_site_disorder_assembly 
 _atom_site_disorder_group 
Co1 Co 0.984040(11) 0.739088(9) 0.809899(8) 0.01210(3) Uani 1 1 d . . . 
N11 N 1.14795(7) 0.79105(6) 0.70550(5) 0.01370(14) Uani 1 1 d . . . 
N21 N 0.91187(7) 0.85560(6) 0.78431(5) 0.01276(13) Uani 1 1 d . . . 
C11 C 1.15449(9) 0.92011(7) 0.62759(6) 0.01698(17) Uani 1 1 d . . . 
C21 C 1.11628(8) 0.87617(7) 0.69510(6) 0.01381(15) Uani 1 1 d . . . 
C31 C 1.05543(9) 0.93755(7) 0.73536(6) 0.01485(16) Uani 1 1 d . . . 
H31A H 1.0864 0.9981 0.7379 0.018 Uiso 1 1 calc R . . 
C41 C 0.96684(8) 0.93476(7) 0.77081(6) 0.01364(15) Uani 1 1 d . . . 
C51 C 0.93171(9) 1.03067(7) 0.79804(6) 0.01667(17) Uani 1 1 d . . . 
C61 C 1.07815(12) 0.87765(10) 0.55582(7) 0.0297(3) Uani 1 1 d . . . 
H61A H 1.0989 0.9035 0.5116 0.045 Uiso 1 1 calc R . . 
H61B H 0.9978 0.8918 0.5533 0.045 Uiso 1 1 calc R . . 
H61C H 1.0889 0.8106 0.5568 0.045 Uiso 1 1 calc R . . 
C71 C 1.14294(11) 1.02546(8) 0.62184(8) 0.0255(2) Uani 1 1 d . . . 
H71A H 1.1659 1.0469 0.5770 0.038 Uiso 1 1 calc R . . 
H71B H 1.1923 1.0538 0.6669 0.038 Uiso 1 1 calc R . . 
H71C H 1.0632 1.0430 0.6180 0.038 Uiso 1 1 calc R . . 
C81 C 1.27962(10) 0.89509(9) 0.63242(7) 0.0225(2) Uani 1 1 d . . . 
H81A H 1.3019 0.9198 0.5884 0.034 Uiso 1 1 calc R . . 
H81B H 1.2882 0.8278 0.6336 0.034 Uiso 1 1 calc R . . 
H81C H 1.3287 0.9216 0.6784 0.034 Uiso 1 1 calc R . . 
C91 C 1.02986(10) 1.10187(8) 0.81003(7) 0.0222(2) Uani 1 1 d . . . 
H91A H 1.0090 1.1569 0.8348 0.033 Uiso 1 1 calc R . . 
H91B H 1.0431 1.1192 0.7612 0.033 Uiso 1 1 calc R . . 
H91C H 1.0998 1.0747 0.8418 0.033 Uiso 1 1 calc R . . 
C101 C 0.90052(10) 1.02170(8) 0.87394(7) 0.0216(2) Uani 1 1 d . . . 
H10C H 0.8879 1.0832 0.8926 0.032 Uiso 1 1 calc R . . 
H10D H 0.9632 0.9912 0.9103 0.032 Uiso 1 1 calc R . . 
H10E H 0.8305 0.9850 0.8674 0.032 Uiso 1 1 calc R . . 
C111 C 0.82996(10) 1.07371(8) 0.74030(7) 0.0225(2) Uani 1 1 d . . . 
H11A H 0.8149 1.1357 0.7571 0.034 Uiso 1 1 calc R . . 
H11B H 0.7620 1.0350 0.7359 0.034 Uiso 1 1 calc R . . 
H11C H 0.8482 1.0778 0.6912 0.034 Uiso 1 1 calc R . . 
C12 C 1.12337(8) 0.73457(6) 0.76108(6) 0.01284(15) Uani 1 1 d . . . 
C22 C 1.16714(8) 0.75197(6) 0.83983(6) 0.01363(15) Uani 1 1 d . . . 
C32 C 1.13312(9) 0.69251(7) 0.89174(6) 0.01580(17) Uani 1 1 d . . . 
H32A H 1.1597 0.7043 0.9442 0.019 Uiso 1 1 calc R . . 
C42 C 1.06096(9) 0.61652(7) 0.86750(6) 0.01617(17) Uani 1 1 d . . . 
H42A H 1.0380 0.5783 0.9033 0.019 Uiso 1 1 calc R . . 
C52 C 1.02291(9) 0.59739(7) 0.79013(6) 0.01563(17) Uani 1 1 d . . . 
H52A H 0.9749 0.5455 0.7740 0.019 Uiso 1 1 calc R . . 
C62 C 1.05486(8) 0.65405(6) 0.73598(6) 0.01392(16) Uani 1 1 d . . . 
C72 C 1.24870(9) 0.83067(7) 0.86950(6) 0.01587(17) Uani 1 1 d . . . 
H72A H 1.2522 0.8714 0.8261 0.019 Uiso 1 1 calc R . . 
C82 C 1.36883(9) 0.79173(9) 0.90259(7) 0.0235(2) Uani 1 1 d . . . 
H82A H 1.3923 0.7544 0.8644 0.035 Uiso 1 1 calc R . . 
H82B H 1.3680 0.7532 0.9464 0.035 Uiso 1 1 calc R . . 
H82C H 1.4229 0.8427 0.9181 0.035 Uiso 1 1 calc R . . 
C92 C 1.20933(10) 0.88934(8) 0.92787(7) 0.02060(19) Uani 1 1 d . . . 
H92A H 1.1303 0.9096 0.9069 0.031 Uiso 1 1 calc R . . 
H92B H 1.2591 0.9434 0.9407 0.031 Uiso 1 1 calc R . . 
H92C H 1.2133 0.8526 0.9733 0.031 Uiso 1 1 calc R . . 
C102 C 1.02148(9) 0.63045(7) 0.65272(6) 0.01687(17) Uani 1 1 d . . . 
H10B H 1.0010 0.6892 0.6239 0.020 Uiso 1 1 calc R . . 
C112 C 0.91925(11) 0.56524(8) 0.63045(7) 0.0244(2) Uani 1 1 d . . . 
H11D H 0.8553 0.5902 0.6484 0.037 Uiso 1 1 calc R . . 
H11E H 0.9405 0.5045 0.6532 0.037 Uiso 1 1 calc R . . 
H11F H 0.8964 0.5591 0.5755 0.037 Uiso 1 1 calc R . . 
C122 C 1.12560(12) 0.58886(9) 0.63080(8) 0.0274(2) Uani 1 1 d . . . 
H12D H 1.1889 0.6332 0.6420 0.041 Uiso 1 1 calc R . . 
H12E H 1.1055 0.5747 0.5768 0.041 Uiso 1 1 calc R . . 
H12F H 1.1489 0.5321 0.6596 0.041 Uiso 1 1 calc R . . 
C13 C 0.79213(8) 0.85146(6) 0.78057(5) 0.01316(15) Uani 1 1 d . . . 
C23 C 0.71170(8) 0.86516(7) 0.71020(6) 0.01438(16) Uani 1 1 d . . . 
C33 C 0.59541(9) 0.85530(7) 0.70572(6) 0.01750(18) Uani 1 1 d . . . 
H33A H 0.5416 0.8665 0.6591 0.021 Uiso 1 1 calc R . . 
C43 C 0.55632(9) 0.82936(8) 0.76796(7) 0.01963(19) Uani 1 1 d . . . 
H43A H 0.4766 0.8233 0.7640 0.024 Uiso 1 1 calc R . . 
C53 C 0.63472(9) 0.81249(8) 0.83571(6) 0.01875(18) Uani 1 1 d . . . 
H53A H 0.6081 0.7930 0.8779 0.022 Uiso 1 1 calc R . . 
C63 C 0.75205(9) 0.82350(7) 0.84355(6) 0.01539(16) Uani 1 1 d . . . 
C73 C 0.75272(9) 0.88094(7) 0.63930(6) 0.01483(16) Uani 1 1 d . . . 
H73A H 0.8258 0.9168 0.6537 0.018 Uiso 1 1 calc R . . 
C83 C 0.66887(10) 0.93514(8) 0.57779(7) 0.0223(2) Uani 1 1 d . . . 
H83A H 0.6476 0.9926 0.5991 0.033 Uiso 1 1 calc R . . 
H83B H 0.6002 0.8979 0.5581 0.033 Uiso 1 1 calc R . . 
H83C H 0.7052 0.9496 0.5369 0.033 Uiso 1 1 calc R . . 
C93 C 0.77922(11) 0.78722(8) 0.60908(7) 0.0230(2) Uani 1 1 d . . . 
H93A H 0.8349 0.7542 0.6485 0.035 Uiso 1 1 calc R . . 
H93B H 0.8110 0.7965 0.5653 0.035 Uiso 1 1 calc R . . 
H93C H 0.7087 0.7509 0.5941 0.035 Uiso 1 1 calc R . . 
C103 C 0.83127(10) 0.80215(8) 0.91999(6) 0.01928(19) Uani 1 1 d . . . 
H10A H 0.9108 0.8197 0.9185 0.023 Uiso 1 1 calc R . . 
C113 C 0.80028(13) 0.85583(11) 0.98446(7) 0.0304(3) Uani 1 1 d . . . 
H11G H 0.7992 0.9221 0.9736 0.046 Uiso 1 1 calc R . . 
H11H H 0.8573 0.8432 1.0317 0.046 Uiso 1 1 calc R . . 
H11I H 0.7246 0.8364 0.9892 0.046 Uiso 1 1 calc R . . 
C123 C 0.83004(11) 0.69836(9) 0.93664(7) 0.0252(2) Uani 1 1 d . . . 
H12A H 0.8466 0.6636 0.8947 0.038 Uiso 1 1 calc R . . 
H12B H 0.7545 0.6807 0.9428 0.038 Uiso 1 1 calc R . . 
H12C H 0.8883 0.6845 0.9830 0.038 Uiso 1 1 calc R . . 
  
loop_ 
 _atom_site_aniso_label 
 _atom_site_aniso_U_11 
 _atom_site_aniso_U_22 
 _atom_site_aniso_U_33 
 _atom_site_aniso_U_23 
 _atom_site_aniso_U_13 
 _atom_site_aniso_U_12 
Co1 0.01041(5) 0.01129(5) 0.01488(6) 0.00146(4) 0.00368(4) 0.00106(4) 
N11 0.0139(3) 0.0132(3) 0.0147(3) 0.0015(3) 0.0048(3) -0.0001(3) 
N21 0.0097(3) 0.0127(3) 0.0153(3) -0.0001(3) 0.0021(3) 0.0011(2) 
C11 0.0156(4) 0.0193(4) 0.0159(4) 0.0046(3) 0.0036(3) -0.0013(3) 
C21 0.0119(4) 0.0150(4) 0.0137(4) 0.0017(3) 0.0017(3) -0.0010(3) 
C31 0.0145(4) 0.0127(4) 0.0170(4) 0.0012(3) 0.0032(3) -0.0002(3) 
C41 0.0130(4) 0.0130(4) 0.0136(4) -0.0007(3) 0.0007(3) 0.0011(3) 
C51 0.0149(4) 0.0132(4) 0.0202(4) -0.0042(3) 0.0012(3) 0.0013(3) 
C61 0.0327(6) 0.0376(7) 0.0157(5) 0.0042(5) 0.0002(5) -0.0113(5) 
C71 0.0281(6) 0.0217(5) 0.0290(6) 0.0114(4) 0.0113(5) 0.0023(4) 
C81 0.0185(5) 0.0255(5) 0.0263(5) 0.0073(4) 0.0109(4) 0.0012(4) 
C91 0.0207(5) 0.0152(4) 0.0289(6) -0.0045(4) 0.0026(4) -0.0020(4) 
C101 0.0226(5) 0.0201(5) 0.0221(5) -0.0059(4) 0.0055(4) 0.0020(4) 
C111 0.0210(5) 0.0158(4) 0.0267(5) -0.0018(4) -0.0017(4) 0.0044(4) 
C12 0.0114(3) 0.0120(3) 0.0157(4) 0.0017(3) 0.0045(3) 0.0016(3) 
C22 0.0115(4) 0.0142(4) 0.0149(4) 0.0036(3) 0.0028(3) 0.0008(3) 
C32 0.0143(4) 0.0163(4) 0.0163(4) 0.0044(3) 0.0028(3) 0.0008(3) 
C42 0.0151(4) 0.0145(4) 0.0193(4) 0.0050(3) 0.0050(3) 0.0010(3) 
C52 0.0145(4) 0.0114(4) 0.0215(5) 0.0018(3) 0.0053(3) 0.0010(3) 
C62 0.0123(4) 0.0118(4) 0.0181(4) 0.0002(3) 0.0046(3) 0.0019(3) 
C72 0.0140(4) 0.0165(4) 0.0159(4) 0.0028(3) 0.0013(3) -0.0026(3) 
C82 0.0125(4) 0.0293(5) 0.0270(6) 0.0033(4) 0.0018(4) -0.0014(4) 
C92 0.0211(5) 0.0194(5) 0.0200(5) -0.0009(4) 0.0026(4) -0.0023(4) 
C102 0.0178(4) 0.0148(4) 0.0180(4) -0.0018(3) 0.0044(4) 0.0010(3) 
C112 0.0273(6) 0.0191(5) 0.0240(5) -0.0018(4) 0.0010(4) -0.0056(4) 
C122 0.0286(6) 0.0286(6) 0.0274(6) -0.0058(5) 0.0119(5) 0.0080(5) 
C13 0.0125(4) 0.0127(4) 0.0143(4) -0.0019(3) 0.0032(3) 0.0009(3) 
C23 0.0127(4) 0.0143(4) 0.0151(4) -0.0018(3) 0.0015(3) 0.0013(3) 
C33 0.0130(4) 0.0184(4) 0.0197(5) -0.0020(3) 0.0014(3) 0.0014(3) 
C43 0.0132(4) 0.0216(5) 0.0244(5) -0.0015(4) 0.0053(4) 0.0010(3) 
C53 0.0159(4) 0.0207(4) 0.0216(5) -0.0006(4) 0.0084(4) 0.0014(3) 
C63 0.0151(4) 0.0164(4) 0.0151(4) -0.0015(3) 0.0045(3) 0.0014(3) 
C73 0.0137(4) 0.0168(4) 0.0134(4) -0.0010(3) 0.0021(3) 0.0007(3) 
C83 0.0234(5) 0.0228(5) 0.0184(5) 0.0026(4) 0.0009(4) 0.0039(4) 
C93 0.0278(6) 0.0234(5) 0.0179(5) -0.0031(4) 0.0057(4) 0.0069(4) 
C103 0.0188(5) 0.0246(5) 0.0150(4) 0.0003(4) 0.0050(4) 0.0020(4) 
C113 0.0353(7) 0.0388(7) 0.0176(5) -0.0064(5) 0.0076(5) 0.0034(5) 
C123 0.0250(5) 0.0277(6) 0.0240(5) 0.0086(4) 0.0082(4) 0.0046(4) 
  
_geom_special_details 
; 
 All esds (except the esd in the dihedral angle between two l.s. planes) 
 are estimated using the full covariance matrix.  The cell esds are taken 
 into account individually in the estimation of esds in distances, angles 
 and torsion angles; correlations between esds in cell parameters are only 
 used when they are defined by crystal symmetry.  An approximate (isotropic) 
 treatment of cell esds is used for estimating esds involving l.s. planes. 
; 
  
loop_ 
 _geom_bond_atom_site_label_1 
 _geom_bond_atom_site_label_2 
 _geom_bond_distance 
 _geom_bond_site_symmetry_2 
 _geom_bond_publ_flag 
Co1 N21 1.9037(8) . ? 
Co1 C12 2.0916(10) . ? 
Co1 C32 2.1448(10) . ? 
Co1 C22 2.1480(10) . ? 
Co1 C42 2.1544(10) . ? 
Co1 C52 2.1560(10) . ? 
Co1 C62 2.1575(10) . ? 
N11 C21 1.2910(13) . ? 
N11 C12 1.3942(13) . ? 
N21 C41 1.3775(13) . ? 
N21 C13 1.4302(13) . ? 
C11 C81 1.5336(16) . ? 
C11 C71 1.5337(16) . ? 
C11 C61 1.5345(17) . ? 
C11 C21 1.5589(14) . ? 
C21 C31 1.4636(14) . ? 
C31 C41 1.3819(14) . ? 
C31 H31A 0.9500 . ? 
C41 C51 1.5696(14) . ? 
C51 C101 1.5335(16) . ? 
C51 C111 1.5397(15) . ? 
C51 C91 1.5444(15) . ? 
C61 H61A 0.9800 . ? 
C61 H61B 0.9800 . ? 
C61 H61C 0.9800 . ? 
C71 H71A 0.9800 . ? 
C71 H71B 0.9800 . ? 
C71 H71C 0.9800 . ? 
C81 H81A 0.9800 . ? 
C81 H81B 0.9800 . ? 
C81 H81C 0.9800 . ? 
C91 H91A 0.9800 . ? 
C91 H91B 0.9800 . ? 
C91 H91C 0.9800 . ? 
C101 H10C 0.9800 . ? 
C101 H10D 0.9800 . ? 
C101 H10E 0.9800 . ? 
C111 H11A 0.9800 . ? 
C111 H11B 0.9800 . ? 
C111 H11C 0.9800 . ? 
C12 C22 1.4302(14) . ? 
C12 C62 1.4376(14) . ? 
C22 C32 1.4172(14) . ? 
C22 C72 1.5160(14) . ? 
C32 C42 1.4054(15) . ? 
C32 H32A 0.9500 . ? 
C42 C52 1.4049(15) . ? 
C42 H42A 0.9500 . ? 
C52 C62 1.4128(14) . ? 
C52 H52A 0.9500 . ? 
C62 C102 1.5169(15) . ? 
C72 C92 1.5307(16) . ? 
C72 C82 1.5330(15) . ? 
C72 H72A 1.0000 . ? 
C82 H82A 0.9800 . ? 
C82 H82B 0.9800 . ? 
C82 H82C 0.9800 . ? 
C92 H92A 0.9800 . ? 
C92 H92B 0.9800 . ? 
C92 H92C 0.9800 . ? 
C102 C112 1.5265(16) . ? 
C102 C122 1.5337(16) . ? 
C102 H10B 1.0000 . ? 
C112 H11D 0.9800 . ? 
C112 H11E 0.9800 . ? 
C112 H11F 0.9800 . ? 
C122 H12D 0.9800 . ? 
C122 H12E 0.9800 . ? 
C122 H12F 0.9800 . ? 
C13 C63 1.4163(14) . ? 
C13 C23 1.4221(14) . ? 
C23 C33 1.3921(15) . ? 
C23 C73 1.5175(14) . ? 
C33 C43 1.3894(16) . ? 
C33 H33A 0.9500 . ? 
C43 C53 1.3829(16) . ? 
C43 H43A 0.9500 . ? 
C53 C63 1.3959(15) . ? 
C53 H53A 0.9500 . ? 
C63 C103 1.5186(15) . ? 
C73 C93 1.5297(15) . ? 
C73 C83 1.5310(15) . ? 
C73 H73A 1.0000 . ? 
C83 H83A 0.9800 . ? 
C83 H83B 0.9800 . ? 
C83 H83C 0.9800 . ? 
C93 H93A 0.9800 . ? 
C93 H93B 0.9800 . ? 
C93 H93C 0.9800 . ? 
C103 C123 1.5350(17) . ? 
C103 C113 1.5359(17) . ? 
C103 H10A 1.0000 . ? 
C113 H11G 0.9800 . ? 
C113 H11H 0.9800 . ? 
C113 H11I 0.9800 . ? 
C123 H12A 0.9800 . ? 
C123 H12B 0.9800 . ? 
C123 H12C 0.9800 . ? 
  
loop_ 
 _geom_angle_atom_site_label_1 
 _geom_angle_atom_site_label_2 
 _geom_angle_atom_site_label_3 
 _geom_angle 
 _geom_angle_site_symmetry_1 
 _geom_angle_site_symmetry_3 
 _geom_angle_publ_flag 
N21 Co1 C12 106.82(4) . . ? 
N21 Co1 C32 134.75(4) . . ? 
C12 Co1 C32 70.47(4) . . ? 
N21 Co1 C22 111.37(4) . . ? 
C12 Co1 C22 39.40(4) . . ? 
C32 Co1 C22 38.55(4) . . ? 
N21 Co1 C42 165.11(4) . . ? 
C12 Co1 C42 83.65(4) . . ? 
C32 Co1 C42 38.16(4) . . ? 
C22 Co1 C42 69.87(4) . . ? 
N21 Co1 C52 155.22(4) . . ? 
C12 Co1 C52 70.56(4) . . ? 
C32 Co1 C52 68.80(4) . . ? 
C22 Co1 C52 82.69(4) . . ? 
C42 Co1 C52 38.04(4) . . ? 
N21 Co1 C62 125.43(4) . . ? 
C12 Co1 C62 39.51(4) . . ? 
C32 Co1 C62 82.26(4) . . ? 
C22 Co1 C62 70.58(4) . . ? 
C42 Co1 C62 69.35(4) . . ? 
C52 Co1 C62 38.24(4) . . ? 
C21 N11 C12 124.02(9) . . ? 
C41 N21 C13 123.49(8) . . ? 
C41 N21 Co1 124.83(7) . . ? 
C13 N21 Co1 111.68(6) . . ? 
C81 C11 C71 108.09(9) . . ? 
C81 C11 C61 109.13(10) . . ? 
C71 C11 C61 108.36(10) . . ? 
C81 C11 C21 109.77(9) . . ? 
C71 C11 C21 114.90(9) . . ? 
C61 C11 C21 106.47(9) . . ? 
N11 C21 C31 132.30(9) . . ? 
N11 C21 C11 111.85(9) . . ? 
C31 C21 C11 115.83(8) . . ? 
C41 C31 C21 139.64(9) . . ? 
C41 C31 H31A 110.2 . . ? 
C21 C31 H31A 110.2 . . ? 
N21 C41 C31 124.87(9) . . ? 
N21 C41 C51 119.99(9) . . ? 
C31 C41 C51 115.13(9) . . ? 
C101 C51 C111 108.92(9) . . ? 
C101 C51 C91 106.23(9) . . ? 
C111 C51 C91 106.25(9) . . ? 
C101 C51 C41 111.07(9) . . ? 
C111 C51 C41 111.85(8) . . ? 
C91 C51 C41 112.24(9) . . ? 
C11 C61 H61A 109.5 . . ? 
C11 C61 H61B 109.5 . . ? 
H61A C61 H61B 109.5 . . ? 
C11 C61 H61C 109.5 . . ? 
H61A C61 H61C 109.5 . . ? 
H61B C61 H61C 109.5 . . ? 
C11 C71 H71A 109.5 . . ? 
C11 C71 H71B 109.5 . . ? 
H71A C71 H71B 109.5 . . ? 
C11 C71 H71C 109.5 . . ? 
H71A C71 H71C 109.5 . . ? 
H71B C71 H71C 109.5 . . ? 
C11 C81 H81A 109.5 . . ? 
C11 C81 H81B 109.5 . . ? 
H81A C81 H81B 109.5 . . ? 
C11 C81 H81C 109.5 . . ? 
H81A C81 H81C 109.5 . . ? 
H81B C81 H81C 109.5 . . ? 
C51 C91 H91A 109.5 . . ? 
C51 C91 H91B 109.5 . . ? 
H91A C91 H91B 109.5 . . ? 
C51 C91 H91C 109.5 . . ? 
H91A C91 H91C 109.5 . . ? 
H91B C91 H91C 109.5 . . ? 
C51 C101 H10C 109.5 . . ? 
C51 C101 H10D 109.5 . . ? 
H10C C101 H10D 109.5 . . ? 
C51 C101 H10E 109.5 . . ? 
H10C C101 H10E 109.5 . . ? 
H10D C101 H10E 109.5 . . ? 
C51 C111 H11A 109.5 . . ? 
C51 C111 H11B 109.5 . . ? 
H11A C111 H11B 109.5 . . ? 
C51 C111 H11C 109.5 . . ? 
H11A C111 H11C 109.5 . . ? 
H11B C111 H11C 109.5 . . ? 
N11 C12 C22 122.76(9) . . ? 
N11 C12 C62 116.87(9) . . ? 
C22 C12 C62 120.32(9) . . ? 
N11 C12 Co1 129.27(7) . . ? 
C22 C12 Co1 72.43(6) . . ? 
C62 C12 Co1 72.72(5) . . ? 
C32 C22 C12 118.29(9) . . ? 
C32 C22 C72 119.11(9) . . ? 
C12 C22 C72 122.59(8) . . ? 
C32 C22 Co1 70.60(6) . . ? 
C12 C22 Co1 68.17(5) . . ? 
C72 C22 Co1 133.77(7) . . ? 
C42 C32 C22 121.58(10) . . ? 
C42 C32 Co1 71.29(6) . . ? 
C22 C32 Co1 70.84(6) . . ? 
C42 C32 H32A 119.2 . . ? 
C22 C32 H32A 119.2 . . ? 
Co1 C32 H32A 131.7 . . ? 
C52 C42 C32 119.68(9) . . ? 
C52 C42 Co1 71.04(6) . . ? 
C32 C42 Co1 70.55(6) . . ? 
C52 C42 H42A 120.2 . . ? 
C32 C42 H42A 120.2 . . ? 
Co1 C42 H42A 130.9 . . ? 
C42 C52 C62 121.07(9) . . ? 
C42 C52 Co1 70.91(6) . . ? 
C62 C52 Co1 70.94(6) . . ? 
C42 C52 H52A 119.5 . . ? 
C62 C52 H52A 119.5 . . ? 
Co1 C52 H52A 131.6 . . ? 
C52 C62 C12 118.82(9) . . ? 
C52 C62 C102 121.63(9) . . ? 
C12 C62 C102 119.52(9) . . ? 
C52 C62 Co1 70.83(6) . . ? 
C12 C62 Co1 67.77(5) . . ? 
C102 C62 Co1 135.41(7) . . ? 
C22 C72 C92 112.45(9) . . ? 
C22 C72 C82 109.33(9) . . ? 
C92 C72 C82 110.78(9) . . ? 
C22 C72 H72A 108.0 . . ? 
C92 C72 H72A 108.0 . . ? 
C82 C72 H72A 108.0 . . ? 
C72 C82 H82A 109.5 . . ? 
C72 C82 H82B 109.5 . . ? 
H82A C82 H82B 109.5 . . ? 
C72 C82 H82C 109.5 . . ? 
H82A C82 H82C 109.5 . . ? 
H82B C82 H82C 109.5 . . ? 
C72 C92 H92A 109.5 . . ? 
C72 C92 H92B 109.5 . . ? 
H92A C92 H92B 109.5 . . ? 
C72 C92 H92C 109.5 . . ? 
H92A C92 H92C 109.5 . . ? 
H92B C92 H92C 109.5 . . ? 
C62 C102 C112 113.81(9) . . ? 
C62 C102 C122 108.75(9) . . ? 
C112 C102 C122 110.29(10) . . ? 
C62 C102 H10B 107.9 . . ? 
C112 C102 H10B 107.9 . . ? 
C122 C102 H10B 107.9 . . ? 
C102 C112 H11D 109.5 . . ? 
C102 C112 H11E 109.5 . . ? 
H11D C112 H11E 109.5 . . ? 
C102 C112 H11F 109.5 . . ? 
H11D C112 H11F 109.5 . . ? 
H11E C112 H11F 109.5 . . ? 
C102 C122 H12D 109.5 . . ? 
C102 C122 H12E 109.5 . . ? 
H12D C122 H12E 109.5 . . ? 
C102 C122 H12F 109.5 . . ? 
H12D C122 H12F 109.5 . . ? 
H12E C122 H12F 109.5 . . ? 
C63 C13 C23 118.97(9) . . ? 
C63 C13 N21 121.18(9) . . ? 
C23 C13 N21 119.44(9) . . ? 
C33 C23 C13 119.35(9) . . ? 
C33 C23 C73 120.18(9) . . ? 
C13 C23 C73 120.19(9) . . ? 
C43 C33 C23 121.43(10) . . ? 
C43 C33 H33A 119.3 . . ? 
C23 C33 H33A 119.3 . . ? 
C53 C43 C33 119.25(10) . . ? 
C53 C43 H43A 120.4 . . ? 
C33 C43 H43A 120.4 . . ? 
C43 C53 C63 121.50(10) . . ? 
C43 C53 H53A 119.3 . . ? 
C63 C53 H53A 119.3 . . ? 
C53 C63 C13 119.42(10) . . ? 
C53 C63 C103 117.50(9) . . ? 
C13 C63 C103 123.06(9) . . ? 
C23 C73 C93 108.53(9) . . ? 
C23 C73 C83 114.27(9) . . ? 
C93 C73 C83 110.36(9) . . ? 
C23 C73 H73A 107.8 . . ? 
C93 C73 H73A 107.8 . . ? 
C83 C73 H73A 107.8 . . ? 
C73 C83 H83A 109.5 . . ? 
C73 C83 H83B 109.5 . . ? 
H83A C83 H83B 109.5 . . ? 
C73 C83 H83C 109.5 . . ? 
H83A C83 H83C 109.5 . . ? 
H83B C83 H83C 109.5 . . ? 
C73 C93 H93A 109.5 . . ? 
C73 C93 H93B 109.5 . . ? 
H93A C93 H93B 109.5 . . ? 
C73 C93 H93C 109.5 . . ? 
H93A C93 H93C 109.5 . . ? 
H93B C93 H93C 109.5 . . ? 
C63 C103 C123 110.35(9) . . ? 
C63 C103 C113 112.87(10) . . ? 
C123 C103 C113 109.08(10) . . ? 
C63 C103 H10A 108.1 . . ? 
C123 C103 H10A 108.1 . . ? 
C113 C103 H10A 108.1 . . ? 
C103 C113 H11G 109.5 . . ? 
C103 C113 H11H 109.5 . . ? 
H11G C113 H11H 109.5 . . ? 
C103 C113 H11I 109.5 . . ? 
H11G C113 H11I 109.5 . . ? 
H11H C113 H11I 109.5 . . ? 
C103 C123 H12A 109.5 . . ? 
C103 C123 H12B 109.5 . . ? 
H12A C123 H12B 109.5 . . ? 
C103 C123 H12C 109.5 . . ? 
H12A C123 H12C 109.5 . . ? 
H12B C123 H12C 109.5 . . ? 
  
loop_ 
 _geom_torsion_atom_site_label_1 
 _geom_torsion_atom_site_label_2 
 _geom_torsion_atom_site_label_3 
 _geom_torsion_atom_site_label_4 
 _geom_torsion 
 _geom_torsion_site_symmetry_1 
 _geom_torsion_site_symmetry_2 
 _geom_torsion_site_symmetry_3 
 _geom_torsion_site_symmetry_4 
 _geom_torsion_publ_flag 
C12 Co1 N21 C41 -28.61(9) . . . . ? 
C32 Co1 N21 C41 50.32(10) . . . . ? 
C22 Co1 N21 C41 12.93(9) . . . . ? 
C42 Co1 N21 C41 104.84(16) . . . . ? 
C52 Co1 N21 C41 -108.54(11) . . . . ? 
C62 Co1 N21 C41 -67.89(9) . . . . ? 
C12 Co1 N21 C13 151.32(7) . . . . ? 
C32 Co1 N21 C13 -129.75(7) . . . . ? 
C22 Co1 N21 C13 -167.14(6) . . . . ? 
C42 Co1 N21 C13 -75.22(16) . . . . ? 
C52 Co1 N21 C13 71.39(11) . . . . ? 
C62 Co1 N21 C13 112.04(7) . . . . ? 
C12 N11 C21 C31 3.05(17) . . . . ? 
C12 N11 C21 C11 -178.76(9) . . . . ? 
C81 C11 C21 N11 -45.60(12) . . . . ? 
C71 C11 C21 N11 -167.64(10) . . . . ? 
C61 C11 C21 N11 72.40(12) . . . . ? 
C81 C11 C21 C31 132.91(10) . . . . ? 
C71 C11 C21 C31 10.87(13) . . . . ? 
C61 C11 C21 C31 -109.10(11) . . . . ? 
N11 C21 C31 C41 -38.4(2) . . . . ? 
C11 C21 C31 C41 143.43(13) . . . . ? 
C13 N21 C41 C31 -143.88(10) . . . . ? 
Co1 N21 C41 C31 36.04(14) . . . . ? 
C13 N21 C41 C51 37.57(14) . . . . ? 
Co1 N21 C41 C51 -142.51(8) . . . . ? 
C21 C31 C41 N21 7.4(2) . . . . ? 
C21 C31 C41 C51 -173.99(12) . . . . ? 
N21 C41 C51 C101 36.41(12) . . . . ? 
C31 C41 C51 C101 -142.27(10) . . . . ? 
N21 C41 C51 C111 -85.52(12) . . . . ? 
C31 C41 C51 C111 95.80(11) . . . . ? 
N21 C41 C51 C91 155.17(9) . . . . ? 
C31 C41 C51 C91 -23.52(13) . . . . ? 
C21 N11 C12 C22 -64.46(14) . . . . ? 
C21 N11 C12 C62 118.19(11) . . . . ? 
C21 N11 C12 Co1 29.11(15) . . . . ? 
N21 Co1 C12 N11 -14.91(10) . . . . ? 
C32 Co1 C12 N11 -147.22(10) . . . . ? 
C22 Co1 C12 N11 -118.31(11) . . . . ? 
C42 Co1 C12 N11 175.91(10) . . . . ? 
C52 Co1 C12 N11 139.14(10) . . . . ? 
C62 Co1 C12 N11 110.92(11) . . . . ? 
N21 Co1 C12 C22 103.40(6) . . . . ? 
C32 Co1 C12 C22 -28.91(5) . . . . ? 
C42 Co1 C12 C22 -65.78(6) . . . . ? 
C52 Co1 C12 C22 -102.55(6) . . . . ? 
C62 Co1 C12 C22 -130.77(8) . . . . ? 
N21 Co1 C12 C62 -125.83(6) . . . . ? 
C32 Co1 C12 C62 101.86(6) . . . . ? 
C22 Co1 C12 C62 130.77(8) . . . . ? 
C42 Co1 C12 C62 64.99(6) . . . . ? 
C52 Co1 C12 C62 28.22(6) . . . . ? 
N11 C12 C22 C32 177.40(9) . . . . ? 
C62 C12 C22 C32 -5.35(14) . . . . ? 
Co1 C12 C22 C32 51.54(8) . . . . ? 
N11 C12 C22 C72 -3.08(14) . . . . ? 
C62 C12 C22 C72 174.18(9) . . . . ? 
Co1 C12 C22 C72 -128.93(9) . . . . ? 
N11 C12 C22 Co1 125.85(9) . . . . ? 
C62 C12 C22 Co1 -56.89(8) . . . . ? 
N21 Co1 C22 C32 136.22(6) . . . . ? 
C12 Co1 C22 C32 -133.03(8) . . . . ? 
C42 Co1 C22 C32 -27.91(6) . . . . ? 
C52 Co1 C22 C32 -64.91(6) . . . . ? 
C62 Co1 C22 C32 -102.30(7) . . . . ? 
N21 Co1 C22 C12 -90.76(6) . . . . ? 
C32 Co1 C22 C12 133.03(8) . . . . ? 
C42 Co1 C22 C12 105.12(6) . . . . ? 
C52 Co1 C22 C12 68.12(6) . . . . ? 
C62 Co1 C22 C12 30.72(5) . . . . ? 
N21 Co1 C22 C72 24.07(11) . . . . ? 
C12 Co1 C22 C72 114.83(11) . . . . ? 
C32 Co1 C22 C72 -112.15(12) . . . . ? 
C42 Co1 C22 C72 -140.05(11) . . . . ? 
C52 Co1 C22 C72 -177.05(10) . . . . ? 
C62 Co1 C22 C72 145.55(10) . . . . ? 
C12 C22 C32 C42 1.84(14) . . . . ? 
C72 C22 C32 C42 -177.71(9) . . . . ? 
Co1 C22 C32 C42 52.25(9) . . . . ? 
C12 C22 C32 Co1 -50.42(8) . . . . ? 
C72 C22 C32 Co1 130.04(9) . . . . ? 
N21 Co1 C32 C42 160.20(6) . . . . ? 
C12 Co1 C32 C42 -105.17(7) . . . . ? 
C22 Co1 C32 C42 -134.66(9) . . . . ? 
C52 Co1 C32 C42 -29.13(6) . . . . ? 
C62 Co1 C32 C42 -66.24(6) . . . . ? 
N21 Co1 C32 C22 -65.13(8) . . . . ? 
C12 Co1 C32 C22 29.50(6) . . . . ? 
C42 Co1 C32 C22 134.66(9) . . . . ? 
C52 Co1 C32 C22 105.54(7) . . . . ? 
C62 Co1 C32 C22 68.43(6) . . . . ? 
C22 C32 C42 C52 1.23(15) . . . . ? 
Co1 C32 C42 C52 53.29(9) . . . . ? 
C22 C32 C42 Co1 -52.06(9) . . . . ? 
N21 Co1 C42 C52 158.03(13) . . . . ? 
C12 Co1 C42 C52 -66.34(6) . . . . ? 
C32 Co1 C42 C52 -132.57(9) . . . . ? 
C22 Co1 C42 C52 -104.40(7) . . . . ? 
C62 Co1 C42 C52 -28.30(6) . . . . ? 
N21 Co1 C42 C32 -69.40(16) . . . . ? 
C12 Co1 C42 C32 66.24(6) . . . . ? 
C22 Co1 C42 C32 28.17(6) . . . . ? 
C52 Co1 C42 C32 132.57(9) . . . . ? 
C62 Co1 C42 C32 104.27(7) . . . . ? 
C32 C42 C52 C62 -0.79(15) . . . . ? 
Co1 C42 C52 C62 52.27(8) . . . . ? 
C32 C42 C52 Co1 -53.06(9) . . . . ? 
N21 Co1 C52 C42 -166.74(8) . . . . ? 
C12 Co1 C52 C42 105.13(7) . . . . ? 
C32 Co1 C52 C42 29.21(6) . . . . ? 
C22 Co1 C52 C42 66.47(6) . . . . ? 
C62 Co1 C52 C42 134.21(9) . . . . ? 
N21 Co1 C52 C62 59.05(11) . . . . ? 
C12 Co1 C52 C62 -29.09(6) . . . . ? 
C32 Co1 C52 C62 -105.00(7) . . . . ? 
C22 Co1 C52 C62 -67.74(6) . . . . ? 
C42 Co1 C52 C62 -134.21(9) . . . . ? 
C42 C52 C62 C12 -2.69(14) . . . . ? 
Co1 C52 C62 C12 49.57(8) . . . . ? 
C42 C52 C62 C102 175.57(9) . . . . ? 
Co1 C52 C62 C102 -132.17(9) . . . . ? 
C42 C52 C62 Co1 -52.26(9) . . . . ? 
N11 C12 C62 C52 -176.79(9) . . . . ? 
C22 C12 C62 C52 5.79(14) . . . . ? 
Co1 C12 C62 C52 -50.96(8) . . . . ? 
N11 C12 C62 C102 4.91(13) . . . . ? 
C22 C12 C62 C102 -172.50(9) . . . . ? 
Co1 C12 C62 C102 130.75(9) . . . . ? 
N11 C12 C62 Co1 -125.83(8) . . . . ? 
C22 C12 C62 Co1 56.75(8) . . . . ? 
N21 Co1 C62 C52 -153.82(6) . . . . ? 
C12 Co1 C62 C52 133.91(9) . . . . ? 
C32 Co1 C62 C52 65.35(6) . . . . ? 
C22 Co1 C62 C52 103.26(6) . . . . ? 
C42 Co1 C62 C52 28.17(6) . . . . ? 
N21 Co1 C62 C12 72.27(7) . . . . ? 
C32 Co1 C62 C12 -68.56(6) . . . . ? 
C22 Co1 C62 C12 -30.64(5) . . . . ? 
C42 Co1 C62 C12 -105.74(6) . . . . ? 
C52 Co1 C62 C12 -133.91(9) . . . . ? 
N21 Co1 C62 C102 -37.83(11) . . . . ? 
C12 Co1 C62 C102 -110.10(12) . . . . ? 
C32 Co1 C62 C102 -178.66(10) . . . . ? 
C22 Co1 C62 C102 -140.75(11) . . . . ? 
C42 Co1 C62 C102 144.16(11) . . . . ? 
C52 Co1 C62 C102 115.99(12) . . . . ? 
C32 C22 C72 C92 -50.94(12) . . . . ? 
C12 C22 C72 C92 129.54(10) . . . . ? 
Co1 C22 C72 C92 39.46(13) . . . . ? 
C32 C22 C72 C82 72.55(12) . . . . ? 
C12 C22 C72 C82 -106.97(11) . . . . ? 
Co1 C22 C72 C82 162.95(8) . . . . ? 
C52 C62 C102 C112 21.14(14) . . . . ? 
C12 C62 C102 C112 -160.61(9) . . . . ? 
Co1 C62 C102 C112 -73.18(13) . . . . ? 
C52 C62 C102 C122 -102.23(11) . . . . ? 
C12 C62 C102 C122 76.01(12) . . . . ? 
Co1 C62 C102 C122 163.45(9) . . . . ? 
C41 N21 C13 C63 -121.77(11) . . . . ? 
Co1 N21 C13 C63 58.30(10) . . . . ? 
C41 N21 C13 C23 65.64(13) . . . . ? 
Co1 N21 C13 C23 -114.29(8) . . . . ? 
C63 C13 C23 C33 3.17(14) . . . . ? 
N21 C13 C23 C33 175.93(9) . . . . ? 
C63 C13 C23 C73 -170.79(9) . . . . ? 
N21 C13 C23 C73 1.97(14) . . . . ? 
C13 C23 C33 C43 -2.15(15) . . . . ? 
C73 C23 C33 C43 171.81(10) . . . . ? 
C23 C33 C43 C53 -0.37(17) . . . . ? 
C33 C43 C53 C63 1.87(17) . . . . ? 
C43 C53 C63 C13 -0.79(16) . . . . ? 
C43 C53 C63 C103 -179.29(10) . . . . ? 
C23 C13 C63 C53 -1.74(14) . . . . ? 
N21 C13 C63 C53 -174.36(9) . . . . ? 
C23 C13 C63 C103 176.67(9) . . . . ? 
N21 C13 C63 C103 4.05(15) . . . . ? 
C33 C23 C73 C93 -91.80(11) . . . . ? 
C13 C23 C73 C93 82.11(11) . . . . ? 
C33 C23 C73 C83 31.82(13) . . . . ? 
C13 C23 C73 C83 -154.26(9) . . . . ? 
C53 C63 C103 C123 68.00(12) . . . . ? 
C13 C63 C103 C123 -110.44(11) . . . . ? 
C53 C63 C103 C113 -54.34(14) . . . . ? 
C13 C63 C103 C113 127.23(11) . . . . ? 
  
_diffrn_measured_fraction_theta_max    0.988 
_diffrn_reflns_theta_full              37.78 
_diffrn_measured_fraction_theta_full   0.988 
_refine_diff_density_max    0.611 
_refine_diff_density_min   -0.326 
_refine_diff_density_rms    0.073 
#===END
_publ_section_references
;
Altomare, A., Burla, M. C., Camalli, M., Cascarano, G. L., Giacovazzo, C.,
Guagliardi, A., Moliterni, A. G. G., Polidori, G., Spagna, R (1999).
SIR97, J. Appl. Cryst. 32, 115-119.

Bruker (2009). SAINT V7.68A, Bruker AXS, Inc., Madison, WI, USA.

Bruker (2010). APEX2 V2010.7-0, Bruker AXS, Inc., Madison, WI, USA.

Sheldrick, G. M. (2008). SADABS V2008/1, University of G\"ottingen, Germany.

Sheldrick, G. M. (2008). Acta Cryst. A64, 112-122.
;
 
data_L(tBu)Co(PPh3) 
  
_vrf_PLAT860_L(tBu)Co(PPh3) 
; 
PROBLEM: _G Note: Number of Least-Squares Restraints ....... 7 
RESPONSE: Corresponding bond lengths and angles in both directions along 
the diethyl ether molecule were restrained to be similar. Anisotropic 
displacement parameters of neighboring and/or symmetry equivalent atoms 
were constrained to be equivalent. Additionally, the C--C bond lengths 
and the C--O bond lengths were restrained to be 1.513 and 1.426 \%A, 
respectively. 
; 
  
_vrf_PLAT302_L(tBu)Co(PPh3) 
; 
PROBLEM: _G Note: Anion/Solvent Disorder ................... 50.00 Perc. 
RESPONSE: The co-crystallized diethyl ether molecule is modeled as 
disordered over a crystallographic inversion center (50:50). 
; 
  
_audit_creation_method            SHELXL-97 
_chemical_name_systematic 
; 
 ? 
; 
_chemical_name_common             L(tBu)Co(PPh3) 
_chemical_melting_point           ? 
_chemical_formula_moiety          'C53 H68 Co N2 P, 0.5(C4 H10 O)' 
_chemical_formula_sum             'C55 H73 Co N2 O0.5 P' 
_chemical_formula_weight          860.05 
  
loop_ 
 _atom_type_symbol 
 _atom_type_description 
 _atom_type_scat_dispersion_real 
 _atom_type_scat_dispersion_imag 
 _atom_type_scat_source 
 'C'  'C'   0.0033   0.0016 
 'International Tables Vol C Tables 4.2.6.8 and 6.1.1.4' 
 'H'  'H'   0.0000   0.0000 
 'International Tables Vol C Tables 4.2.6.8 and 6.1.1.4' 
 'N'  'N'   0.0061   0.0033 
 'International Tables Vol C Tables 4.2.6.8 and 6.1.1.4' 
 'O'  'O'   0.0106   0.0060 
 'International Tables Vol C Tables 4.2.6.8 and 6.1.1.4' 
 'P'  'P'   0.1023   0.0942 
 'International Tables Vol C Tables 4.2.6.8 and 6.1.1.4' 
 'Co'  'Co'   0.3494   0.9721 
 'International Tables Vol C Tables 4.2.6.8 and 6.1.1.4' 
  
_symmetry_cell_setting            monoclinic 
_symmetry_space_group_name_H-M    'P 1 21/c 1' 
  
loop_ 
 _symmetry_equiv_pos_as_xyz 
 'x, y, z' 
 '-x, y+1/2, -z+1/2' 
 '-x, -y, -z' 
 'x, -y-1/2, z-1/2' 
  
_cell_length_a                    21.782(2) 
_cell_length_b                    12.8292(11) 
_cell_length_c                    17.2050(15) 
_cell_angle_alpha                 90.00 
_cell_angle_beta                  96.280(2) 
_cell_angle_gamma                 90.00 
_cell_volume                      4779.1(7) 
_cell_formula_units_Z             4 
_cell_measurement_temperature     100.0(1) 
_cell_measurement_reflns_used     3958 
_cell_measurement_theta_min       2.82 
_cell_measurement_theta_max       27.10 
  
_exptl_crystal_description        block 
_exptl_crystal_colour             red 
_exptl_crystal_size_max           0.22 
_exptl_crystal_size_mid           0.20 
_exptl_crystal_size_min           0.10 
_exptl_crystal_density_meas       ? 
_exptl_crystal_density_diffrn     1.195 
_exptl_crystal_density_method     'not measured' 
_exptl_crystal_F_000              1852 
_exptl_absorpt_coefficient_mu     0.431 
_exptl_absorpt_correction_type    multi-scan 
_exptl_absorpt_correction_T_min   0.9111 
_exptl_absorpt_correction_T_max   0.9581 
_exptl_absorpt_process_details    'SADABS (Sheldrick, 2008)' 
  
_exptl_special_details 
; 
 ? 
; 
  
_diffrn_ambient_temperature       100.0(1) 
_diffrn_radiation_wavelength      0.71073 
_diffrn_radiation_type            MoK\a 
_diffrn_radiation_source          'fine-focus sealed tube' 
_diffrn_radiation_monochromator   graphite 
_diffrn_measurement_device_type   'Bruker SMART APEX II CCD Platform' 
_diffrn_measurement_method        'area detector, \w scans per \f' 
_diffrn_detector_area_resol_mean  ? 
_diffrn_standards_number          0 
_diffrn_standards_interval_count  ? 
_diffrn_standards_interval_time   ? 
_diffrn_standards_decay_%         ? 
_diffrn_reflns_number             115061 
_diffrn_reflns_av_R_equivalents   0.1256 
_diffrn_reflns_av_sigmaI/netI     0.0739 
_diffrn_reflns_limit_h_min        -32 
_diffrn_reflns_limit_h_max        32 
_diffrn_reflns_limit_k_min        -18 
_diffrn_reflns_limit_k_max        18 
_diffrn_reflns_limit_l_min        -25 
_diffrn_reflns_limit_l_max        25 
_diffrn_reflns_theta_min          1.85 
_diffrn_reflns_theta_max          31.51 
_reflns_number_total              15877 
_reflns_number_gt                 10457 
_reflns_threshold_expression      >2sigma(I) 
  
_computing_data_collection        'APEX2 (Bruker 2010)' 
_computing_cell_refinement        'SAINT (Bruker 2009)' 
_computing_data_reduction         'SAINT (Bruker 2009)' 
_computing_structure_solution     'SIR-97 (Altomare et al., 1999)' 
_computing_structure_refinement   'SHELXL-97 (Sheldrick, 2008)' 
_computing_molecular_graphics     'SHELXTL (Sheldrick, 2008)' 
_computing_publication_material   'SHELXTL (Sheldrick, 2008)' 
  
_refine_special_details 
; 
 Refinement of F^2^ against ALL reflections.  The weighted R-factor wR and 
 goodness of fit S are based on F^2^, conventional R-factors R are based 
 on F, with F set to zero for negative F^2^. The threshold expression of 
 F^2^ > 2sigma(F^2^) is used only for calculating R-factors(gt) etc. and is 
 not relevant to the choice of reflections for refinement.  R-factors based 
 on F^2^ are statistically about twice as large as those based on F, and R- 
 factors based on ALL data will be even larger. 
  
 The co-crystallized diethyl ether molecule is modeled as disordered over 
 a crystallographic inversion center (50:50). Corresponding bond lengths 
 and angles in both directions along the diethyl ether molecule were 
 restrained to be similar. Anisotropic displacement parameters of 
 neighboring and/or symmetry equivalent atoms were constrained to be 
 equivalent. Additionally, the C--C bond lengths and the C--O bond lengths 
 were restrained to be 1.513 and 1.426 \%A, respectively. 
; 
  
_refine_ls_structure_factor_coef  Fsqd 
_refine_ls_matrix_type            full 
_refine_ls_weighting_scheme       calc 
_refine_ls_weighting_details 
 'calc w=1/[\s^2^(Fo^2^)+(0.0501P)^2^+2.9778P] where P=(Fo^2^+2Fc^2^)/3' 
_atom_sites_solution_primary      direct 
_atom_sites_solution_secondary    difmap 
_atom_sites_solution_hydrogens    geom 
_refine_ls_hydrogen_treatment     constr 
_refine_ls_extinction_method      none 
_refine_ls_extinction_coef        ? 
_refine_ls_number_reflns          15877 
_refine_ls_number_parameters      555 
_refine_ls_number_restraints      7 
_refine_ls_R_factor_all           0.1032 
_refine_ls_R_factor_gt            0.0622 
_refine_ls_wR_factor_ref          0.1462 
_refine_ls_wR_factor_gt           0.1264 
_refine_ls_goodness_of_fit_ref    1.027 
_refine_ls_restrained_S_all       1.027 
_refine_ls_shift/su_max           0.003 
_refine_ls_shift/su_mean          0.000 
  
loop_ 
 _atom_site_label 
 _atom_site_type_symbol 
 _atom_site_fract_x 
 _atom_site_fract_y 
 _atom_site_fract_z 
 _atom_site_U_iso_or_equiv 
 _atom_site_adp_type 
 _atom_site_occupancy 
 _atom_site_symmetry_multiplicity 
 _atom_site_calc_flag 
 _atom_site_refinement_flags 
 _atom_site_disorder_assembly 
 _atom_site_disorder_group 
Co1 Co 0.736588(13) -0.02671(2) 0.721085(17) 0.01910(7) Uani 1 1 d . . . 
N11 N 0.76955(8) -0.16584(13) 0.75734(10) 0.0191(3) Uani 1 1 d . . . 
N21 N 0.80775(8) 0.01837(13) 0.67021(11) 0.0208(3) Uani 1 1 d . . . 
C11 C 0.85836(10) -0.30395(17) 0.77054(13) 0.0241(4) Uani 1 1 d . . . 
C21 C 0.82375(10) -0.20170(16) 0.73853(12) 0.0201(4) Uani 1 1 d . . . 
C31 C 0.85964(10) -0.14451(16) 0.69013(13) 0.0226(4) Uani 1 1 d . . . 
H31A H 0.8930 -0.1833 0.6736 0.027 Uiso 1 1 calc R . . 
C41 C 0.85632(9) -0.04197(16) 0.66121(13) 0.0213(4) Uani 1 1 d . . . 
C51 C 0.91372(10) -0.01157(18) 0.61817(14) 0.0263(5) Uani 1 1 d . . . 
C61 C 0.87941(11) -0.36952(18) 0.70305(14) 0.0281(5) Uani 1 1 d . . . 
H61A H 0.9029 -0.4300 0.7246 0.042 Uiso 1 1 calc R . . 
H61B H 0.9055 -0.3268 0.6727 0.042 Uiso 1 1 calc R . . 
H61C H 0.8431 -0.3934 0.6690 0.042 Uiso 1 1 calc R . . 
C71 C 0.91642(11) -0.2682(2) 0.82270(15) 0.0337(5) Uani 1 1 d . . . 
H71A H 0.9366 -0.3288 0.8492 0.051 Uiso 1 1 calc R . . 
H71B H 0.9046 -0.2187 0.8618 0.051 Uiso 1 1 calc R . . 
H71C H 0.9450 -0.2345 0.7904 0.051 Uiso 1 1 calc R . . 
C81 C 0.82438(11) -0.38240(18) 0.81831(14) 0.0295(5) Uani 1 1 d . . . 
H81A H 0.8508 -0.4433 0.8308 0.044 Uiso 1 1 calc R . . 
H81B H 0.7860 -0.4045 0.7877 0.044 Uiso 1 1 calc R . . 
H81C H 0.8147 -0.3494 0.8669 0.044 Uiso 1 1 calc R . . 
C91 C 0.91499(13) -0.0848(2) 0.54768(16) 0.0395(6) Uani 1 1 d . . . 
H91A H 0.9493 -0.0653 0.5182 0.059 Uiso 1 1 calc R . . 
H91B H 0.8760 -0.0789 0.5138 0.059 Uiso 1 1 calc R . . 
H91C H 0.9206 -0.1568 0.5661 0.059 Uiso 1 1 calc R . . 
C101 C 0.91705(11) 0.10045(18) 0.58703(15) 0.0284(5) Uani 1 1 d . . . 
H10A H 0.9541 0.1082 0.5599 0.043 Uiso 1 1 calc R . . 
H10B H 0.9189 0.1496 0.6308 0.043 Uiso 1 1 calc R . . 
H10C H 0.8803 0.1149 0.5505 0.043 Uiso 1 1 calc R . . 
C111 C 0.97353(11) -0.0271(2) 0.67412(18) 0.0376(6) Uani 1 1 d . . . 
H11A H 1.0094 -0.0104 0.6466 0.056 Uiso 1 1 calc R . . 
H11B H 0.9762 -0.0998 0.6917 0.056 Uiso 1 1 calc R . . 
H11C H 0.9729 0.0189 0.7195 0.056 Uiso 1 1 calc R . . 
C12 C 0.73575(10) -0.21932(15) 0.81169(13) 0.0212(4) Uani 1 1 d . . . 
C22 C 0.74912(11) -0.20095(17) 0.89237(13) 0.0253(5) Uani 1 1 d . . . 
C32 C 0.71879(13) -0.26019(19) 0.94434(15) 0.0331(5) Uani 1 1 d . . . 
H32A H 0.7283 -0.2498 0.9990 0.040 Uiso 1 1 calc R . . 
C42 C 0.67529(13) -0.33364(18) 0.91774(16) 0.0362(6) Uani 1 1 d . . . 
H42A H 0.6570 -0.3766 0.9539 0.043 Uiso 1 1 calc R . . 
C52 C 0.65834(11) -0.34465(17) 0.83817(15) 0.0307(5) Uani 1 1 d . . . 
H52A H 0.6267 -0.3927 0.8203 0.037 Uiso 1 1 calc R . . 
C62 C 0.68688(10) -0.28650(16) 0.78376(14) 0.0232(4) Uani 1 1 d . . . 
C72 C 0.79498(11) -0.11810(18) 0.92474(13) 0.0278(5) Uani 1 1 d . . . 
H72A H 0.8184 -0.0935 0.8814 0.033 Uiso 1 1 calc R . . 
C82 C 0.76025(13) -0.02554(19) 0.95439(16) 0.0368(6) Uani 1 1 d . . . 
H82A H 0.7338 0.0057 0.9108 0.055 Uiso 1 1 calc R . . 
H82B H 0.7899 0.0265 0.9770 0.055 Uiso 1 1 calc R . . 
H82C H 0.7347 -0.0493 0.9944 0.055 Uiso 1 1 calc R . . 
C92 C 0.84127(15) -0.1591(2) 0.99091(16) 0.0472(7) Uani 1 1 d . . . 
H92A H 0.8713 -0.1043 1.0074 0.071 Uiso 1 1 calc R . . 
H92B H 0.8629 -0.2197 0.9725 0.071 Uiso 1 1 calc R . . 
H92C H 0.8193 -0.1795 1.0353 0.071 Uiso 1 1 calc R . . 
C102 C 0.66482(10) -0.29423(16) 0.69730(14) 0.0245(4) Uani 1 1 d . . . 
H10D H 0.6711 -0.2241 0.6741 0.029 Uiso 1 1 calc R . . 
C112 C 0.70175(11) -0.37188(18) 0.65414(14) 0.0286(5) Uani 1 1 d . . . 
H11D H 0.7448 -0.3487 0.6567 0.043 Uiso 1 1 calc R . . 
H11E H 0.6841 -0.3762 0.5993 0.043 Uiso 1 1 calc R . . 
H11F H 0.7001 -0.4407 0.6786 0.043 Uiso 1 1 calc R . . 
C122 C 0.59566(11) -0.31876(18) 0.68170(17) 0.0331(6) Uani 1 1 d . . . 
H12A H 0.5824 -0.3122 0.6256 0.050 Uiso 1 1 calc R . . 
H12B H 0.5723 -0.2697 0.7107 0.050 Uiso 1 1 calc R . . 
H12C H 0.5881 -0.3900 0.6988 0.050 Uiso 1 1 calc R . . 
C13 C 0.80457(10) 0.12795(16) 0.65394(13) 0.0234(4) Uani 1 1 d . . . 
C23 C 0.76841(10) 0.16466(17) 0.58662(14) 0.0250(4) Uani 1 1 d . . . 
C33 C 0.76438(12) 0.27225(18) 0.57469(16) 0.0331(5) Uani 1 1 d . . . 
H33A H 0.7410 0.2981 0.5289 0.040 Uiso 1 1 calc R . . 
C43 C 0.79326(14) 0.34150(19) 0.62725(17) 0.0402(6) Uani 1 1 d . . . 
H43A H 0.7900 0.4143 0.6176 0.048 Uiso 1 1 calc R . . 
C53 C 0.82703(13) 0.30492(19) 0.69424(17) 0.0391(6) Uani 1 1 d . . . 
H53A H 0.8462 0.3533 0.7310 0.047 Uiso 1 1 calc R . . 
C63 C 0.83354(11) 0.19861(18) 0.70903(15) 0.0298(5) Uani 1 1 d . . . 
C73 C 0.73549(11) 0.09148(18) 0.52669(14) 0.0267(5) Uani 1 1 d . . . 
H73A H 0.7353 0.0204 0.5505 0.032 Uiso 1 1 calc R . . 
C83 C 0.66857(11) 0.1239(2) 0.50397(16) 0.0345(5) Uani 1 1 d . . . 
H83A H 0.6481 0.1344 0.5513 0.052 Uiso 1 1 calc R . . 
H83B H 0.6471 0.0691 0.4719 0.052 Uiso 1 1 calc R . . 
H83C H 0.6675 0.1890 0.4740 0.052 Uiso 1 1 calc R . . 
C93 C 0.76746(14) 0.0838(3) 0.45189(18) 0.0481(7) Uani 1 1 d . . . 
H93A H 0.8093 0.0560 0.4646 0.072 Uiso 1 1 calc R . . 
H93B H 0.7698 0.1532 0.4286 0.072 Uiso 1 1 calc R . . 
H93C H 0.7438 0.0372 0.4147 0.072 Uiso 1 1 calc R . . 
C103 C 0.87183(12) 0.1606(2) 0.78256(16) 0.0366(6) Uani 1 1 d . . . 
H10E H 0.8865 0.0888 0.7713 0.044 Uiso 1 1 calc R . . 
C113 C 0.92898(17) 0.2260(3) 0.8067(2) 0.0698(12) Uani 1 1 d . . . 
H11G H 0.9534 0.2327 0.7624 0.105 Uiso 1 1 calc R . . 
H11H H 0.9539 0.1920 0.8504 0.105 Uiso 1 1 calc R . . 
H11I H 0.9164 0.2953 0.8229 0.105 Uiso 1 1 calc R . . 
C123 C 0.83293(16) 0.1510(3) 0.84890(19) 0.0602(9) Uani 1 1 d . . . 
H12D H 0.7973 0.1063 0.8331 0.090 Uiso 1 1 calc R . . 
H12E H 0.8185 0.2203 0.8627 0.090 Uiso 1 1 calc R . . 
H12F H 0.8576 0.1203 0.8943 0.090 Uiso 1 1 calc R . . 
P1 P 0.64079(2) 0.01705(4) 0.73970(3) 0.01912(11) Uani 1 1 d . . . 
C14 C 0.57887(10) -0.04579(16) 0.67564(13) 0.0213(4) Uani 1 1 d . . . 
C24 C 0.59176(10) -0.07339(16) 0.60064(13) 0.0237(4) Uani 1 1 d . . . 
H24A H 0.6324 -0.0646 0.5865 0.028 Uiso 1 1 calc R . . 
C34 C 0.54620(11) -0.11324(18) 0.54668(14) 0.0289(5) Uani 1 1 d . . . 
H34A H 0.5554 -0.1299 0.4954 0.035 Uiso 1 1 calc R . . 
C44 C 0.48726(11) -0.12899(19) 0.56717(15) 0.0313(5) Uani 1 1 d . . . 
H44A H 0.4560 -0.1571 0.5302 0.038 Uiso 1 1 calc R . . 
C54 C 0.47388(11) -0.10370(19) 0.64162(15) 0.0307(5) Uani 1 1 d . . . 
H54A H 0.4335 -0.1154 0.6559 0.037 Uiso 1 1 calc R . . 
C64 C 0.51928(10) -0.06120(17) 0.69568(14) 0.0260(5) Uani 1 1 d . . . 
H64A H 0.5096 -0.0427 0.7464 0.031 Uiso 1 1 calc R . . 
C74 C 0.62667(10) 0.15494(16) 0.71456(13) 0.0226(4) Uani 1 1 d . . . 
C84 C 0.67278(11) 0.22659(18) 0.73853(15) 0.0302(5) Uani 1 1 d . . . 
H84A H 0.7106 0.2031 0.7655 0.036 Uiso 1 1 calc R . . 
C94 C 0.66397(13) 0.33193(18) 0.72344(17) 0.0367(6) Uani 1 1 d . . . 
H94A H 0.6953 0.3805 0.7411 0.044 Uiso 1 1 calc R . . 
C104 C 0.60961(13) 0.36623(19) 0.68276(17) 0.0381(6) Uani 1 1 d . . . 
H10F H 0.6038 0.4383 0.6716 0.046 Uiso 1 1 calc R . . 
C114 C 0.56387(13) 0.29616(19) 0.65840(16) 0.0357(6) Uani 1 1 d . . . 
H11J H 0.5265 0.3201 0.6303 0.043 Uiso 1 1 calc R . . 
C124 C 0.57175(11) 0.19058(18) 0.67448(14) 0.0278(5) Uani 1 1 d . . . 
H12G H 0.5396 0.1427 0.6581 0.033 Uiso 1 1 calc R . . 
C134 C 0.61180(10) 0.01098(16) 0.83587(13) 0.0219(4) Uani 1 1 d . . . 
C144 C 0.60004(13) 0.09925(18) 0.87855(15) 0.0357(6) Uani 1 1 d . . . 
H14A H 0.6036 0.1663 0.8561 0.043 Uiso 1 1 calc R . . 
C154 C 0.58321(16) 0.0903(2) 0.95362(17) 0.0467(8) Uani 1 1 d . . . 
H15A H 0.5760 0.1512 0.9827 0.056 Uiso 1 1 calc R . . 
C164 C 0.57683(13) -0.00667(19) 0.98639(15) 0.0349(6) Uani 1 1 d . . . 
H16A H 0.5648 -0.0126 1.0376 0.042 Uiso 1 1 calc R . . 
C174 C 0.58793(11) -0.09469(18) 0.94459(14) 0.0274(5) Uani 1 1 d . . . 
H17A H 0.5834 -0.1615 0.9670 0.033 Uiso 1 1 calc R . . 
C184 C 0.60555(10) -0.08648(17) 0.87034(14) 0.0253(4) Uani 1 1 d . . . 
H18A H 0.6135 -0.1478 0.8422 0.030 Uiso 1 1 calc R . . 
C15 C 1.0453(10) -0.1092(14) 0.9195(8) 0.092(4) Uani 0.50 1 d PD A -1 
H15B H 1.0498 -0.1221 0.8642 0.138 Uiso 0.50 1 calc PR A -1 
H15C H 1.0262 -0.1700 0.9416 0.138 Uiso 0.50 1 calc PR A -1 
H15D H 1.0862 -0.0971 0.9481 0.138 Uiso 0.50 1 calc PR A -1 
C25 C 1.0050(4) -0.0141(7) 0.9266(4) 0.0842(16) Uani 0.50 1 d PD A -1 
H25A H 1.0226 0.0483 0.9035 0.101 Uiso 0.50 1 calc PR A -1 
H25B H 0.9625 -0.0257 0.9013 0.101 Uiso 0.50 1 calc PR A -1 
O1 O 1.0060(5) -0.0040(9) 1.0106(4) 0.0842(16) Uani 0.50 1 d PD A -1 
C35 C 0.9736(4) 0.0916(7) 1.0240(4) 0.0842(16) Uani 0.50 1 d PD A -1 
H35A H 0.9328 0.0943 0.9925 0.101 Uiso 0.50 1 calc PR A -1 
H35B H 0.9980 0.1536 1.0124 0.101 Uiso 0.50 1 calc PR A -1 
C45 C 0.9673(10) 0.0825(16) 1.1099(6) 0.092(4) Uani 0.50 1 d PD A -1 
H45A H 0.9464 0.1445 1.1274 0.138 Uiso 0.50 1 calc PR A -1 
H45B H 1.0084 0.0767 1.1391 0.138 Uiso 0.50 1 calc PR A -1 
H45C H 0.9431 0.0203 1.1193 0.138 Uiso 0.50 1 calc PR A -1 
  
loop_ 
 _atom_site_aniso_label 
 _atom_site_aniso_U_11 
 _atom_site_aniso_U_22 
 _atom_site_aniso_U_33 
 _atom_site_aniso_U_23 
 _atom_site_aniso_U_13 
 _atom_site_aniso_U_12 
Co1 0.02028(14) 0.01520(13) 0.02259(15) 0.00043(11) 0.00574(10) -0.00057(11) 
N11 0.0225(8) 0.0158(8) 0.0194(9) 0.0013(6) 0.0037(7) -0.0010(6) 
N21 0.0214(8) 0.0179(8) 0.0239(9) -0.0001(7) 0.0059(7) -0.0022(7) 
C11 0.0249(10) 0.0237(10) 0.0236(11) 0.0035(8) 0.0022(9) 0.0060(8) 
C21 0.0237(10) 0.0172(9) 0.0192(10) 0.0003(8) 0.0011(8) -0.0009(8) 
C31 0.0203(10) 0.0212(10) 0.0266(11) -0.0001(8) 0.0041(8) 0.0016(8) 
C41 0.0195(9) 0.0230(10) 0.0218(10) -0.0012(8) 0.0034(8) -0.0032(8) 
C51 0.0220(10) 0.0254(11) 0.0333(12) -0.0007(9) 0.0107(9) -0.0018(8) 
C61 0.0308(12) 0.0239(10) 0.0302(12) 0.0013(9) 0.0056(10) 0.0079(9) 
C71 0.0301(12) 0.0357(13) 0.0333(13) 0.0046(11) -0.0058(10) 0.0052(10) 
C81 0.0359(13) 0.0229(10) 0.0304(12) 0.0070(9) 0.0067(10) 0.0095(9) 
C91 0.0493(16) 0.0315(13) 0.0423(16) -0.0043(11) 0.0254(13) -0.0077(12) 
C101 0.0248(11) 0.0289(11) 0.0333(13) 0.0034(10) 0.0107(9) -0.0037(9) 
C111 0.0212(11) 0.0354(13) 0.0565(17) 0.0077(13) 0.0055(11) -0.0014(10) 
C12 0.0266(10) 0.0145(9) 0.0237(11) 0.0025(8) 0.0085(8) 0.0034(8) 
C22 0.0340(12) 0.0202(10) 0.0224(11) 0.0024(8) 0.0066(9) 0.0060(9) 
C32 0.0513(16) 0.0273(12) 0.0233(12) 0.0046(9) 0.0151(11) 0.0078(11) 
C42 0.0530(16) 0.0221(11) 0.0381(14) 0.0082(10) 0.0261(12) 0.0042(11) 
C52 0.0352(13) 0.0179(10) 0.0421(15) 0.0019(10) 0.0179(11) -0.0004(9) 
C62 0.0265(11) 0.0148(9) 0.0298(12) -0.0009(8) 0.0098(9) 0.0034(8) 
C72 0.0359(12) 0.0279(11) 0.0194(11) -0.0024(9) 0.0019(9) 0.0039(10) 
C82 0.0478(15) 0.0278(12) 0.0360(14) -0.0069(11) 0.0101(12) -0.0011(11) 
C92 0.0618(19) 0.0458(16) 0.0306(14) 0.0012(12) -0.0106(14) 0.0071(14) 
C102 0.0256(11) 0.0168(9) 0.0313(12) 0.0001(8) 0.0043(9) -0.0012(8) 
C112 0.0296(12) 0.0284(11) 0.0282(12) -0.0032(9) 0.0051(9) -0.0021(9) 
C122 0.0263(11) 0.0203(10) 0.0521(16) -0.0042(10) 0.0018(11) -0.0003(9) 
C13 0.0262(11) 0.0171(9) 0.0288(12) 0.0011(8) 0.0114(9) -0.0031(8) 
C23 0.0291(11) 0.0197(10) 0.0279(12) 0.0019(8) 0.0109(9) 0.0001(8) 
C33 0.0443(14) 0.0197(10) 0.0375(14) 0.0062(10) 0.0140(11) 0.0016(10) 
C43 0.0598(18) 0.0173(10) 0.0470(16) -0.0020(11) 0.0220(14) -0.0030(11) 
C53 0.0533(16) 0.0247(11) 0.0422(15) -0.0107(11) 0.0187(13) -0.0143(11) 
C63 0.0341(12) 0.0249(11) 0.0322(13) -0.0043(9) 0.0126(10) -0.0098(9) 
C73 0.0284(11) 0.0223(10) 0.0291(12) 0.0035(9) 0.0020(9) 0.0012(9) 
C83 0.0319(12) 0.0369(13) 0.0346(14) 0.0027(11) 0.0034(10) 0.0066(11) 
C93 0.0391(15) 0.063(2) 0.0443(17) -0.0188(15) 0.0129(13) -0.0066(14) 
C103 0.0383(14) 0.0367(13) 0.0348(14) -0.0079(11) 0.0046(11) -0.0149(11) 
C113 0.067(2) 0.095(3) 0.0467(19) -0.0070(19) 0.0001(17) -0.053(2) 
C123 0.0515(19) 0.089(3) 0.0413(18) 0.0137(18) 0.0091(15) -0.0044(18) 
P1 0.0212(2) 0.0149(2) 0.0219(3) 0.0009(2) 0.0056(2) 0.00087(19) 
C14 0.0219(10) 0.0175(9) 0.0249(11) 0.0016(8) 0.0040(8) 0.0022(8) 
C24 0.0249(10) 0.0196(10) 0.0271(11) -0.0004(8) 0.0050(9) -0.0005(8) 
C34 0.0318(12) 0.0272(11) 0.0275(12) -0.0019(9) 0.0026(10) -0.0002(9) 
C44 0.0278(12) 0.0297(12) 0.0354(13) -0.0023(10) -0.0016(10) -0.0030(10) 
C54 0.0210(10) 0.0324(12) 0.0390(14) 0.0017(10) 0.0045(10) -0.0026(9) 
C64 0.0257(11) 0.0242(10) 0.0291(12) 0.0000(9) 0.0069(9) -0.0007(9) 
C74 0.0279(11) 0.0167(9) 0.0247(11) 0.0019(8) 0.0088(9) 0.0031(8) 
C84 0.0313(12) 0.0205(10) 0.0400(14) 0.0009(10) 0.0090(10) 0.0009(9) 
C94 0.0415(14) 0.0190(10) 0.0519(17) -0.0012(11) 0.0160(12) -0.0023(10) 
C104 0.0515(16) 0.0192(11) 0.0467(16) 0.0065(11) 0.0195(13) 0.0093(11) 
C114 0.0437(15) 0.0280(12) 0.0355(14) 0.0064(10) 0.0054(11) 0.0149(11) 
C124 0.0325(12) 0.0231(10) 0.0284(12) 0.0005(9) 0.0058(10) 0.0068(9) 
C134 0.0240(10) 0.0199(9) 0.0225(10) -0.0014(8) 0.0057(8) 0.0020(8) 
C144 0.0573(17) 0.0199(11) 0.0328(13) 0.0013(10) 0.0174(12) 0.0058(11) 
C154 0.084(2) 0.0249(12) 0.0368(15) -0.0022(11) 0.0298(15) 0.0057(13) 
C164 0.0495(16) 0.0323(12) 0.0253(12) 0.0029(10) 0.0146(11) 0.0060(11) 
C174 0.0315(12) 0.0234(10) 0.0286(12) 0.0035(9) 0.0085(9) 0.0001(9) 
C184 0.0293(11) 0.0198(10) 0.0281(12) -0.0002(9) 0.0088(9) 0.0010(8) 
C15 0.077(8) 0.104(9) 0.097(10) -0.034(7) 0.021(8) -0.028(5) 
C25 0.090(4) 0.120(3) 0.046(3) -0.041(3) 0.021(3) -0.042(3) 
O1 0.090(4) 0.120(3) 0.046(3) -0.041(3) 0.021(3) -0.042(3) 
C35 0.090(4) 0.120(3) 0.046(3) -0.041(3) 0.021(3) -0.042(3) 
C45 0.077(8) 0.104(9) 0.097(10) -0.034(7) 0.021(8) -0.028(5) 
  
_geom_special_details 
; 
 All esds (except the esd in the dihedral angle between two l.s. planes) 
 are estimated using the full covariance matrix.  The cell esds are taken 
 into account individually in the estimation of esds in distances, angles 
 and torsion angles; correlations between esds in cell parameters are only 
 used when they are defined by crystal symmetry.  An approximate (isotropic) 
 treatment of cell esds is used for estimating esds involving l.s. planes. 
; 
  
loop_ 
 _geom_bond_atom_site_label_1 
 _geom_bond_atom_site_label_2 
 _geom_bond_distance 
 _geom_bond_site_symmetry_2 
 _geom_bond_publ_flag 
Co1 N21 1.9494(17) . ? 
Co1 N11 1.9981(17) . ? 
Co1 P1 2.2176(6) . ? 
N11 C21 1.339(3) . ? 
N11 C12 1.428(3) . ? 
N21 C41 1.334(3) . ? 
N21 C13 1.434(3) . ? 
C11 C81 1.539(3) . ? 
C11 C71 1.538(3) . ? 
C11 C61 1.544(3) . ? 
C11 C21 1.582(3) . ? 
C21 C31 1.409(3) . ? 
C31 C41 1.406(3) . ? 
C31 H31A 0.9500 . ? 
C41 C51 1.570(3) . ? 
C51 C91 1.537(3) . ? 
C51 C101 1.538(3) . ? 
C51 C111 1.546(3) . ? 
C61 H61A 0.9800 . ? 
C61 H61B 0.9800 . ? 
C61 H61C 0.9800 . ? 
C71 H71A 0.9800 . ? 
C71 H71B 0.9800 . ? 
C71 H71C 0.9800 . ? 
C81 H81A 0.9800 . ? 
C81 H81B 0.9800 . ? 
C81 H81C 0.9800 . ? 
C91 H91A 0.9800 . ? 
C91 H91B 0.9800 . ? 
C91 H91C 0.9800 . ? 
C101 H10A 0.9800 . ? 
C101 H10B 0.9800 . ? 
C101 H10C 0.9800 . ? 
C111 H11A 0.9800 . ? 
C111 H11B 0.9800 . ? 
C111 H11C 0.9800 . ? 
C12 C22 1.407(3) . ? 
C12 C62 1.412(3) . ? 
C22 C32 1.394(3) . ? 
C22 C72 1.522(3) . ? 
C32 C42 1.379(4) . ? 
C32 H32A 0.9500 . ? 
C42 C52 1.386(4) . ? 
C42 H42A 0.9500 . ? 
C52 C62 1.395(3) . ? 
C52 H52A 0.9500 . ? 
C62 C102 1.516(3) . ? 
C72 C82 1.526(3) . ? 
C72 C92 1.529(3) . ? 
C72 H72A 1.0000 . ? 
C82 H82A 0.9800 . ? 
C82 H82B 0.9800 . ? 
C82 H82C 0.9800 . ? 
C92 H92A 0.9800 . ? 
C92 H92B 0.9800 . ? 
C92 H92C 0.9800 . ? 
C102 C112 1.524(3) . ? 
C102 C122 1.534(3) . ? 
C102 H10D 1.0000 . ? 
C112 H11D 0.9800 . ? 
C112 H11E 0.9800 . ? 
C112 H11F 0.9800 . ? 
C122 H12A 0.9800 . ? 
C122 H12B 0.9800 . ? 
C122 H12C 0.9800 . ? 
C13 C23 1.409(3) . ? 
C13 C63 1.410(3) . ? 
C23 C33 1.397(3) . ? 
C23 C73 1.516(3) . ? 
C33 C43 1.371(4) . ? 
C33 H33A 0.9500 . ? 
C43 C53 1.380(4) . ? 
C43 H43A 0.9500 . ? 
C53 C63 1.392(3) . ? 
C53 H53A 0.9500 . ? 
C63 C103 1.518(4) . ? 
C73 C83 1.525(3) . ? 
C73 C93 1.532(4) . ? 
C73 H73A 1.0000 . ? 
C83 H83A 0.9800 . ? 
C83 H83B 0.9800 . ? 
C83 H83C 0.9800 . ? 
C93 H93A 0.9800 . ? 
C93 H93B 0.9800 . ? 
C93 H93C 0.9800 . ? 
C103 C123 1.499(4) . ? 
C103 C113 1.521(4) . ? 
C103 H10E 1.0000 . ? 
C113 H11G 0.9800 . ? 
C113 H11H 0.9800 . ? 
C113 H11I 0.9800 . ? 
C123 H12D 0.9800 . ? 
C123 H12E 0.9800 . ? 
C123 H12F 0.9800 . ? 
P1 C14 1.833(2) . ? 
P1 C134 1.836(2) . ? 
P1 C74 1.839(2) . ? 
C14 C64 1.393(3) . ? 
C14 C24 1.396(3) . ? 
C24 C34 1.381(3) . ? 
C24 H24A 0.9500 . ? 
C34 C44 1.383(3) . ? 
C34 H34A 0.9500 . ? 
C44 C54 1.383(4) . ? 
C44 H44A 0.9500 . ? 
C54 C64 1.393(3) . ? 
C54 H54A 0.9500 . ? 
C64 H64A 0.9500 . ? 
C74 C84 1.390(3) . ? 
C74 C124 1.391(3) . ? 
C84 C94 1.386(3) . ? 
C84 H84A 0.9500 . ? 
C94 C104 1.380(4) . ? 
C94 H94A 0.9500 . ? 
C104 C114 1.373(4) . ? 
C104 H10F 0.9500 . ? 
C114 C124 1.389(3) . ? 
C114 H11J 0.9500 . ? 
C124 H12G 0.9500 . ? 
C134 C144 1.389(3) . ? 
C134 C184 1.397(3) . ? 
C144 C154 1.385(4) . ? 
C144 H14A 0.9500 . ? 
C154 C164 1.379(4) . ? 
C154 H15A 0.9500 . ? 
C164 C174 1.374(3) . ? 
C164 H16A 0.9500 . ? 
C174 C184 1.377(3) . ? 
C174 H17A 0.9500 . ? 
C184 H18A 0.9500 . ? 
C15 C25 1.517(8) . ? 
C15 H15B 0.9800 . ? 
C15 H15C 0.9800 . ? 
C15 H15D 0.9800 . ? 
C25 O1 1.448(7) . ? 
C25 H25A 0.9900 . ? 
C25 H25B 0.9900 . ? 
O1 C35 1.446(8) . ? 
C35 C45 1.504(8) . ? 
C35 H35A 0.9900 . ? 
C35 H35B 0.9900 . ? 
C45 H45A 0.9800 . ? 
C45 H45B 0.9800 . ? 
C45 H45C 0.9800 . ? 
  
loop_ 
 _geom_angle_atom_site_label_1 
 _geom_angle_atom_site_label_2 
 _geom_angle_atom_site_label_3 
 _geom_angle 
 _geom_angle_site_symmetry_1 
 _geom_angle_site_symmetry_3 
 _geom_angle_publ_flag 
N21 Co1 N11 97.41(7) . . ? 
N21 Co1 P1 142.81(6) . . ? 
N11 Co1 P1 119.52(5) . . ? 
C21 N11 C12 121.64(17) . . ? 
C21 N11 Co1 121.84(14) . . ? 
C12 N11 Co1 116.13(13) . . ? 
C41 N21 C13 124.65(18) . . ? 
C41 N21 Co1 124.04(14) . . ? 
C13 N21 Co1 110.79(13) . . ? 
C81 C11 C71 107.21(19) . . ? 
C81 C11 C61 104.19(18) . . ? 
C71 C11 C61 107.95(19) . . ? 
C81 C11 C21 119.31(18) . . ? 
C71 C11 C21 106.63(18) . . ? 
C61 C11 C21 111.07(18) . . ? 
N11 C21 C31 121.64(19) . . ? 
N11 C21 C11 126.87(18) . . ? 
C31 C21 C11 111.32(18) . . ? 
C41 C31 C21 133.3(2) . . ? 
C41 C31 H31A 113.3 . . ? 
C21 C31 H31A 113.3 . . ? 
N21 C41 C31 120.86(19) . . ? 
N21 C41 C51 126.39(19) . . ? 
C31 C41 C51 112.74(18) . . ? 
C91 C51 C101 106.9(2) . . ? 
C91 C51 C111 109.0(2) . . ? 
C101 C51 C111 105.60(19) . . ? 
C91 C51 C41 107.73(18) . . ? 
C101 C51 C41 117.82(18) . . ? 
C111 C51 C41 109.5(2) . . ? 
C11 C61 H61A 109.5 . . ? 
C11 C61 H61B 109.5 . . ? 
H61A C61 H61B 109.5 . . ? 
C11 C61 H61C 109.5 . . ? 
H61A C61 H61C 109.5 . . ? 
H61B C61 H61C 109.5 . . ? 
C11 C71 H71A 109.5 . . ? 
C11 C71 H71B 109.5 . . ? 
H71A C71 H71B 109.5 . . ? 
C11 C71 H71C 109.5 . . ? 
H71A C71 H71C 109.5 . . ? 
H71B C71 H71C 109.5 . . ? 
C11 C81 H81A 109.5 . . ? 
C11 C81 H81B 109.5 . . ? 
H81A C81 H81B 109.5 . . ? 
C11 C81 H81C 109.5 . . ? 
H81A C81 H81C 109.5 . . ? 
H81B C81 H81C 109.5 . . ? 
C51 C91 H91A 109.5 . . ? 
C51 C91 H91B 109.5 . . ? 
H91A C91 H91B 109.5 . . ? 
C51 C91 H91C 109.5 . . ? 
H91A C91 H91C 109.5 . . ? 
H91B C91 H91C 109.5 . . ? 
C51 C101 H10A 109.5 . . ? 
C51 C101 H10B 109.5 . . ? 
H10A C101 H10B 109.5 . . ? 
C51 C101 H10C 109.5 . . ? 
H10A C101 H10C 109.5 . . ? 
H10B C101 H10C 109.5 . . ? 
C51 C111 H11A 109.5 . . ? 
C51 C111 H11B 109.5 . . ? 
H11A C111 H11B 109.5 . . ? 
C51 C111 H11C 109.5 . . ? 
H11A C111 H11C 109.5 . . ? 
H11B C111 H11C 109.5 . . ? 
C22 C12 C62 120.3(2) . . ? 
C22 C12 N11 120.00(19) . . ? 
C62 C12 N11 119.60(19) . . ? 
C32 C22 C12 118.7(2) . . ? 
C32 C22 C72 119.0(2) . . ? 
C12 C22 C72 122.3(2) . . ? 
C42 C32 C22 121.1(2) . . ? 
C42 C32 H32A 119.4 . . ? 
C22 C32 H32A 119.4 . . ? 
C32 C42 C52 119.8(2) . . ? 
C32 C42 H42A 120.1 . . ? 
C52 C42 H42A 120.1 . . ? 
C42 C52 C62 121.2(2) . . ? 
C42 C52 H52A 119.4 . . ? 
C62 C52 H52A 119.4 . . ? 
C52 C62 C12 118.2(2) . . ? 
C52 C62 C102 120.5(2) . . ? 
C12 C62 C102 121.34(19) . . ? 
C22 C72 C82 109.7(2) . . ? 
C22 C72 C92 112.7(2) . . ? 
C82 C72 C92 109.2(2) . . ? 
C22 C72 H72A 108.4 . . ? 
C82 C72 H72A 108.4 . . ? 
C92 C72 H72A 108.4 . . ? 
C72 C82 H82A 109.5 . . ? 
C72 C82 H82B 109.5 . . ? 
H82A C82 H82B 109.5 . . ? 
C72 C82 H82C 109.5 . . ? 
H82A C82 H82C 109.5 . . ? 
H82B C82 H82C 109.5 . . ? 
C72 C92 H92A 109.5 . . ? 
C72 C92 H92B 109.5 . . ? 
H92A C92 H92B 109.5 . . ? 
C72 C92 H92C 109.5 . . ? 
H92A C92 H92C 109.5 . . ? 
H92B C92 H92C 109.5 . . ? 
C62 C102 C112 113.18(18) . . ? 
C62 C102 C122 112.7(2) . . ? 
C112 C102 C122 109.96(19) . . ? 
C62 C102 H10D 106.9 . . ? 
C112 C102 H10D 106.9 . . ? 
C122 C102 H10D 106.9 . . ? 
C102 C112 H11D 109.5 . . ? 
C102 C112 H11E 109.5 . . ? 
H11D C112 H11E 109.5 . . ? 
C102 C112 H11F 109.5 . . ? 
H11D C112 H11F 109.5 . . ? 
H11E C112 H11F 109.5 . . ? 
C102 C122 H12A 109.5 . . ? 
C102 C122 H12B 109.5 . . ? 
H12A C122 H12B 109.5 . . ? 
C102 C122 H12C 109.5 . . ? 
H12A C122 H12C 109.5 . . ? 
H12B C122 H12C 109.5 . . ? 
C23 C13 C63 120.4(2) . . ? 
C23 C13 N21 119.94(19) . . ? 
C63 C13 N21 119.4(2) . . ? 
C33 C23 C13 118.1(2) . . ? 
C33 C23 C73 119.7(2) . . ? 
C13 C23 C73 122.18(19) . . ? 
C43 C33 C23 121.8(3) . . ? 
C43 C33 H33A 119.1 . . ? 
C23 C33 H33A 119.1 . . ? 
C33 C43 C53 119.7(2) . . ? 
C33 C43 H43A 120.2 . . ? 
C53 C43 H43A 120.2 . . ? 
C43 C53 C63 121.4(2) . . ? 
C43 C53 H53A 119.3 . . ? 
C63 C53 H53A 119.3 . . ? 
C53 C63 C13 118.6(2) . . ? 
C53 C63 C103 120.2(2) . . ? 
C13 C63 C103 121.2(2) . . ? 
C23 C73 C83 111.9(2) . . ? 
C23 C73 C93 112.7(2) . . ? 
C83 C73 C93 108.2(2) . . ? 
C23 C73 H73A 107.9 . . ? 
C83 C73 H73A 107.9 . . ? 
C93 C73 H73A 107.9 . . ? 
C73 C83 H83A 109.5 . . ? 
C73 C83 H83B 109.5 . . ? 
H83A C83 H83B 109.5 . . ? 
C73 C83 H83C 109.5 . . ? 
H83A C83 H83C 109.5 . . ? 
H83B C83 H83C 109.5 . . ? 
C73 C93 H93A 109.5 . . ? 
C73 C93 H93B 109.5 . . ? 
H93A C93 H93B 109.5 . . ? 
C73 C93 H93C 109.5 . . ? 
H93A C93 H93C 109.5 . . ? 
H93B C93 H93C 109.5 . . ? 
C123 C103 C63 110.9(2) . . ? 
C123 C103 C113 110.5(3) . . ? 
C63 C103 C113 114.1(2) . . ? 
C123 C103 H10E 107.0 . . ? 
C63 C103 H10E 107.0 . . ? 
C113 C103 H10E 107.0 . . ? 
C103 C113 H11G 109.5 . . ? 
C103 C113 H11H 109.5 . . ? 
H11G C113 H11H 109.5 . . ? 
C103 C113 H11I 109.5 . . ? 
H11G C113 H11I 109.5 . . ? 
H11H C113 H11I 109.5 . . ? 
C103 C123 H12D 109.5 . . ? 
C103 C123 H12E 109.5 . . ? 
H12D C123 H12E 109.5 . . ? 
C103 C123 H12F 109.5 . . ? 
H12D C123 H12F 109.5 . . ? 
H12E C123 H12F 109.5 . . ? 
C14 P1 C134 102.72(10) . . ? 
C14 P1 C74 100.86(10) . . ? 
C134 P1 C74 100.81(10) . . ? 
C14 P1 Co1 116.36(7) . . ? 
C134 P1 Co1 122.77(7) . . ? 
C74 P1 Co1 110.21(7) . . ? 
C64 C14 C24 118.7(2) . . ? 
C64 C14 P1 123.92(18) . . ? 
C24 C14 P1 117.27(16) . . ? 
C34 C24 C14 120.9(2) . . ? 
C34 C24 H24A 119.6 . . ? 
C14 C24 H24A 119.6 . . ? 
C24 C34 C44 120.1(2) . . ? 
C24 C34 H34A 119.9 . . ? 
C44 C34 H34A 119.9 . . ? 
C54 C44 C34 119.8(2) . . ? 
C54 C44 H44A 120.1 . . ? 
C34 C44 H44A 120.1 . . ? 
C44 C54 C64 120.3(2) . . ? 
C44 C54 H54A 119.9 . . ? 
C64 C54 H54A 119.9 . . ? 
C14 C64 C54 120.2(2) . . ? 
C14 C64 H64A 119.9 . . ? 
C54 C64 H64A 119.9 . . ? 
C84 C74 C124 118.9(2) . . ? 
C84 C74 P1 117.99(17) . . ? 
C124 C74 P1 123.06(17) . . ? 
C94 C84 C74 120.6(2) . . ? 
C94 C84 H84A 119.7 . . ? 
C74 C84 H84A 119.7 . . ? 
C104 C94 C84 120.0(2) . . ? 
C104 C94 H94A 120.0 . . ? 
C84 C94 H94A 120.0 . . ? 
C114 C104 C94 120.0(2) . . ? 
C114 C104 H10F 120.0 . . ? 
C94 C104 H10F 120.0 . . ? 
C104 C114 C124 120.5(2) . . ? 
C104 C114 H11J 119.7 . . ? 
C124 C114 H11J 119.7 . . ? 
C114 C124 C74 120.0(2) . . ? 
C114 C124 H12G 120.0 . . ? 
C74 C124 H12G 120.0 . . ? 
C144 C134 C184 118.2(2) . . ? 
C144 C134 P1 122.92(17) . . ? 
C184 C134 P1 118.66(16) . . ? 
C154 C144 C134 120.5(2) . . ? 
C154 C144 H14A 119.7 . . ? 
C134 C144 H14A 119.7 . . ? 
C164 C154 C144 120.3(2) . . ? 
C164 C154 H15A 119.8 . . ? 
C144 C154 H15A 119.8 . . ? 
C174 C164 C154 119.7(2) . . ? 
C174 C164 H16A 120.1 . . ? 
C154 C164 H16A 120.1 . . ? 
C164 C174 C184 120.3(2) . . ? 
C164 C174 H17A 119.8 . . ? 
C184 C174 H17A 119.8 . . ? 
C174 C184 C134 120.8(2) . . ? 
C174 C184 H18A 119.6 . . ? 
C134 C184 H18A 119.6 . . ? 
C25 C15 H15B 109.5 . . ? 
C25 C15 H15C 109.5 . . ? 
H15B C15 H15C 109.5 . . ? 
C25 C15 H15D 109.5 . . ? 
H15B C15 H15D 109.5 . . ? 
H15C C15 H15D 109.5 . . ? 
O1 C25 C15 102.0(9) . . ? 
O1 C25 H25A 111.4 . . ? 
C15 C25 H25A 111.4 . . ? 
O1 C25 H25B 111.4 . . ? 
C15 C25 H25B 111.4 . . ? 
H25A C25 H25B 109.2 . . ? 
C35 O1 C25 106.3(7) . . ? 
O1 C35 C45 100.9(9) . . ? 
O1 C35 H35A 111.6 . . ? 
C45 C35 H35A 111.6 . . ? 
O1 C35 H35B 111.6 . . ? 
C45 C35 H35B 111.6 . . ? 
H35A C35 H35B 109.4 . . ? 
C35 C45 H45A 109.5 . . ? 
C35 C45 H45B 109.5 . . ? 
H45A C45 H45B 109.5 . . ? 
C35 C45 H45C 109.5 . . ? 
H45A C45 H45C 109.5 . . ? 
H45B C45 H45C 109.5 . . ? 
  
loop_ 
 _geom_torsion_atom_site_label_1 
 _geom_torsion_atom_site_label_2 
 _geom_torsion_atom_site_label_3 
 _geom_torsion_atom_site_label_4 
 _geom_torsion 
 _geom_torsion_site_symmetry_1 
 _geom_torsion_site_symmetry_2 
 _geom_torsion_site_symmetry_3 
 _geom_torsion_site_symmetry_4 
 _geom_torsion_publ_flag 
N21 Co1 N11 C21 -4.47(17) . . . . ? 
P1 Co1 N11 C21 171.00(14) . . . . ? 
N21 Co1 N11 C12 168.46(15) . . . . ? 
P1 Co1 N11 C12 -16.07(16) . . . . ? 
N11 Co1 N21 C41 6.10(19) . . . . ? 
P1 Co1 N21 C41 -167.36(13) . . . . ? 
N11 Co1 N21 C13 -165.90(14) . . . . ? 
P1 Co1 N21 C13 20.6(2) . . . . ? 
C12 N11 C21 C31 -174.5(2) . . . . ? 
Co1 N11 C21 C31 -2.0(3) . . . . ? 
C12 N11 C21 C11 0.3(3) . . . . ? 
Co1 N11 C21 C11 172.86(15) . . . . ? 
C81 C11 C21 N11 10.4(3) . . . . ? 
C71 C11 C21 N11 -111.0(2) . . . . ? 
C61 C11 C21 N11 131.6(2) . . . . ? 
C81 C11 C21 C31 -174.3(2) . . . . ? 
C71 C11 C21 C31 64.2(2) . . . . ? 
C61 C11 C21 C31 -53.2(2) . . . . ? 
N11 C21 C31 C41 10.7(4) . . . . ? 
C11 C21 C31 C41 -164.9(2) . . . . ? 
C13 N21 C41 C31 169.7(2) . . . . ? 
Co1 N21 C41 C31 -1.2(3) . . . . ? 
C13 N21 C41 C51 -11.5(3) . . . . ? 
Co1 N21 C41 C51 177.60(16) . . . . ? 
C21 C31 C41 N21 -8.9(4) . . . . ? 
C21 C31 C41 C51 172.1(2) . . . . ? 
N21 C41 C51 C91 -117.1(2) . . . . ? 
C31 C41 C51 C91 61.8(3) . . . . ? 
N21 C41 C51 C101 3.8(3) . . . . ? 
C31 C41 C51 C101 -177.3(2) . . . . ? 
N21 C41 C51 C111 124.5(2) . . . . ? 
C31 C41 C51 C111 -56.6(3) . . . . ? 
C21 N11 C12 C22 85.4(3) . . . . ? 
Co1 N11 C12 C22 -87.5(2) . . . . ? 
C21 N11 C12 C62 -97.8(2) . . . . ? 
Co1 N11 C12 C62 89.2(2) . . . . ? 
C62 C12 C22 C32 8.2(3) . . . . ? 
N11 C12 C22 C32 -175.0(2) . . . . ? 
C62 C12 C22 C72 -171.2(2) . . . . ? 
N11 C12 C22 C72 5.6(3) . . . . ? 
C12 C22 C32 C42 -1.7(4) . . . . ? 
C72 C22 C32 C42 177.7(2) . . . . ? 
C22 C32 C42 C52 -4.1(4) . . . . ? 
C32 C42 C52 C62 3.5(4) . . . . ? 
C42 C52 C62 C12 3.0(3) . . . . ? 
C42 C52 C62 C102 -175.9(2) . . . . ? 
C22 C12 C62 C52 -8.8(3) . . . . ? 
N11 C12 C62 C52 174.42(19) . . . . ? 
C22 C12 C62 C102 170.01(19) . . . . ? 
N11 C12 C62 C102 -6.8(3) . . . . ? 
C32 C22 C72 C82 -73.1(3) . . . . ? 
C12 C22 C72 C82 106.3(2) . . . . ? 
C32 C22 C72 C92 48.8(3) . . . . ? 
C12 C22 C72 C92 -131.8(2) . . . . ? 
C52 C62 C102 C112 -95.5(2) . . . . ? 
C12 C62 C102 C112 85.7(2) . . . . ? 
C52 C62 C102 C122 30.0(3) . . . . ? 
C12 C62 C102 C122 -148.74(19) . . . . ? 
C41 N21 C13 C23 105.8(3) . . . . ? 
Co1 N21 C13 C23 -82.2(2) . . . . ? 
C41 N21 C13 C63 -79.5(3) . . . . ? 
Co1 N21 C13 C63 92.4(2) . . . . ? 
C63 C13 C23 C33 2.7(3) . . . . ? 
N21 C13 C23 C33 177.2(2) . . . . ? 
C63 C13 C23 C73 -178.8(2) . . . . ? 
N21 C13 C23 C73 -4.2(3) . . . . ? 
C13 C23 C33 C43 -1.5(4) . . . . ? 
C73 C23 C33 C43 179.9(2) . . . . ? 
C23 C33 C43 C53 -0.4(4) . . . . ? 
C33 C43 C53 C63 1.3(4) . . . . ? 
C43 C53 C63 C13 -0.2(4) . . . . ? 
C43 C53 C63 C103 179.0(2) . . . . ? 
C23 C13 C63 C53 -1.8(3) . . . . ? 
N21 C13 C63 C53 -176.4(2) . . . . ? 
C23 C13 C63 C103 179.0(2) . . . . ? 
N21 C13 C63 C103 4.4(3) . . . . ? 
C33 C23 C73 C83 -48.5(3) . . . . ? 
C13 C23 C73 C83 133.0(2) . . . . ? 
C33 C23 C73 C93 73.8(3) . . . . ? 
C13 C23 C73 C93 -104.7(3) . . . . ? 
C53 C63 C103 C123 88.9(3) . . . . ? 
C13 C63 C103 C123 -91.9(3) . . . . ? 
C53 C63 C103 C113 -36.7(4) . . . . ? 
C13 C63 C103 C113 142.5(3) . . . . ? 
N21 Co1 P1 C14 98.05(12) . . . . ? 
N11 Co1 P1 C14 -74.50(10) . . . . ? 
N21 Co1 P1 C134 -134.28(12) . . . . ? 
N11 Co1 P1 C134 53.17(10) . . . . ? 
N21 Co1 P1 C74 -15.94(12) . . . . ? 
N11 Co1 P1 C74 171.50(10) . . . . ? 
C134 P1 C14 C64 17.1(2) . . . . ? 
C74 P1 C14 C64 -86.7(2) . . . . ? 
Co1 P1 C14 C64 154.11(16) . . . . ? 
C134 P1 C14 C24 -167.11(16) . . . . ? 
C74 P1 C14 C24 89.06(18) . . . . ? 
Co1 P1 C14 C24 -30.13(19) . . . . ? 
C64 C14 C24 C34 1.3(3) . . . . ? 
P1 C14 C24 C34 -174.70(17) . . . . ? 
C14 C24 C34 C44 -1.8(3) . . . . ? 
C24 C34 C44 C54 0.7(4) . . . . ? 
C34 C44 C54 C64 0.8(4) . . . . ? 
C24 C14 C64 C54 0.2(3) . . . . ? 
P1 C14 C64 C54 175.93(18) . . . . ? 
C44 C54 C64 C14 -1.3(4) . . . . ? 
C14 P1 C74 C84 -165.88(18) . . . . ? 
C134 P1 C74 C84 88.8(2) . . . . ? 
Co1 P1 C74 C84 -42.3(2) . . . . ? 
C14 P1 C74 C124 15.6(2) . . . . ? 
C134 P1 C74 C124 -89.8(2) . . . . ? 
Co1 P1 C74 C124 139.14(18) . . . . ? 
C124 C74 C84 C94 0.6(4) . . . . ? 
P1 C74 C84 C94 -178.0(2) . . . . ? 
C74 C84 C94 C104 -1.5(4) . . . . ? 
C84 C94 C104 C114 1.1(4) . . . . ? 
C94 C104 C114 C124 0.1(4) . . . . ? 
C104 C114 C124 C74 -0.9(4) . . . . ? 
C84 C74 C124 C114 0.6(3) . . . . ? 
P1 C74 C124 C114 179.07(19) . . . . ? 
C14 P1 C134 C144 -118.5(2) . . . . ? 
C74 P1 C134 C144 -14.6(2) . . . . ? 
Co1 P1 C134 C144 108.1(2) . . . . ? 
C14 P1 C134 C184 66.3(2) . . . . ? 
C74 P1 C134 C184 170.21(18) . . . . ? 
Co1 P1 C134 C184 -67.0(2) . . . . ? 
C184 C134 C144 C154 0.7(4) . . . . ? 
P1 C134 C144 C154 -174.5(2) . . . . ? 
C134 C144 C154 C164 -1.2(5) . . . . ? 
C144 C154 C164 C174 0.7(5) . . . . ? 
C154 C164 C174 C184 0.2(4) . . . . ? 
C164 C174 C184 C134 -0.7(4) . . . . ? 
C144 C134 C184 C174 0.3(4) . . . . ? 
P1 C134 C184 C174 175.64(18) . . . . ? 
C15 C25 O1 C35 174.4(13) . . . . ? 
C25 O1 C35 C45 169.8(13) . . . . ? 
  
_diffrn_measured_fraction_theta_max    0.999 
_diffrn_reflns_theta_full              31.51 
_diffrn_measured_fraction_theta_full   0.999 
_refine_diff_density_max    0.595 
_refine_diff_density_min   -0.469 
_refine_diff_density_rms    0.075 
#===END
_publ_section_references
;
Altomare, A., Burla, M. C., Camalli, M., Cascarano, G. L., Giacovazzo, C.,
Guagliardi, A., Moliterni, A. G. G., Polidori, G., Spagna, R (1999).
SIR97, J. Appl. Cryst. 32, 115-119.

Bruker (2009). SAINT V7.68A, Bruker AXS, Inc., Madison, WI, USA.

Bruker (2010). APEX2 V2010.3-0, Bruker AXS, Inc., Madison, WI, USA.

Sheldrick, G. M. (2008). SADABS V2008/1, University of G\"ottingen, Germany.

Sheldrick, G. M. (2008). Acta Cryst. A64, 112-122.

;
 
data_L(tBu)Co(CO)2 
  
_audit_creation_method            SHELXL-97 
_chemical_name_systematic 
; 
 holtd31 
; 
_chemical_name_common             L(tBu)Co(CO)2 
_chemical_melting_point           ? 
_chemical_formula_moiety          'C37 H53 Co N2 O2' 
_chemical_formula_sum 
 'C37 H53 Co N2 O2' 
_chemical_formula_weight          616.74 
  
loop_ 
 _atom_type_symbol 
 _atom_type_description 
 _atom_type_scat_dispersion_real 
 _atom_type_scat_dispersion_imag 
 _atom_type_scat_source 
 'C'  'C'   0.0033   0.0016 
 'International Tables Vol C Tables 4.2.6.8 and 6.1.1.4' 
 'H'  'H'   0.0000   0.0000 
 'International Tables Vol C Tables 4.2.6.8 and 6.1.1.4' 
 'N'  'N'   0.0061   0.0033 
 'International Tables Vol C Tables 4.2.6.8 and 6.1.1.4' 
 'O'  'O'   0.0106   0.0060 
 'International Tables Vol C Tables 4.2.6.8 and 6.1.1.4' 
 'Co'  'Co'   0.3494   0.9721 
 'International Tables Vol C Tables 4.2.6.8 and 6.1.1.4' 
  
_symmetry_cell_setting            triclinic 
_symmetry_space_group_name_H-M    P-1 
  
loop_ 
 _symmetry_equiv_pos_as_xyz 
 'x, y, z' 
 '-x, -y, -z' 
  
_cell_length_a                    9.4586(5) 
_cell_length_b                    12.3354(7) 
_cell_length_c                    15.9870(9) 
_cell_angle_alpha                 97.994(1) 
_cell_angle_beta                  97.008(1) 
_cell_angle_gamma                 111.209(1) 
_cell_volume                      1691.79(16) 
_cell_formula_units_Z             2 
_cell_measurement_temperature     100.0(1) 
_cell_measurement_reflns_used     3757 
_cell_measurement_theta_min       2.65 
_cell_measurement_theta_max       37.62 
  
_exptl_crystal_description        block 
_exptl_crystal_colour             red 
_exptl_crystal_size_max           0.30 
_exptl_crystal_size_mid           0.26 
_exptl_crystal_size_min           0.20 
_exptl_crystal_density_meas       ? 
_exptl_crystal_density_diffrn     1.211 
_exptl_crystal_density_method     'not measured' 
_exptl_crystal_F_000              664 
_exptl_absorpt_coefficient_mu     0.541 
_exptl_absorpt_correction_type    multi-scan 
_exptl_absorpt_correction_T_min   0.8546 
_exptl_absorpt_correction_T_max   0.8996 
_exptl_absorpt_process_details    'SADABS (Sheldrick, 2008)' 
  
_exptl_special_details 
; 
 ? 
; 
  
_diffrn_ambient_temperature       100.0(1) 
_diffrn_radiation_wavelength      0.71073 
_diffrn_radiation_type            MoK\a 
_diffrn_radiation_source          'fine-focus sealed tube' 
_diffrn_radiation_monochromator   graphite 
_diffrn_measurement_device_type   'Bruker SMART APEX II CCD Platform' 
_diffrn_measurement_method        'area detector, \w scans per\f' 
_diffrn_detector_area_resol_mean  ? 
_diffrn_standards_number          0 
_diffrn_standards_interval_count  ? 
_diffrn_standards_interval_time   ? 
_diffrn_standards_decay_%         ? 
_diffrn_reflns_number             50548 
_diffrn_reflns_av_R_equivalents   0.0367 
_diffrn_reflns_av_sigmaI/netI     0.0427 
_diffrn_reflns_limit_h_min        -16 
_diffrn_reflns_limit_h_max        16 
_diffrn_reflns_limit_k_min        -20 
_diffrn_reflns_limit_k_max        20 
_diffrn_reflns_limit_l_min        -27 
_diffrn_reflns_limit_l_max        26 
_diffrn_reflns_theta_min          1.81 
_diffrn_reflns_theta_max          37.04 
_reflns_number_total              16927 
_reflns_number_gt                 13576 
_reflns_threshold_expression      >2sigma(I) 
  
_computing_data_collection        'APEX2 (Bruker, 2010)' 
_computing_cell_refinement        'SAINT (Bruker, 2009)' 
_computing_data_reduction         'SAINT (Bruker, 2009)' 
_computing_structure_solution     'SIR97 (Altomare et al., 1999)' 
_computing_structure_refinement   'SHELXL-97 (Sheldrick, 2008)' 
_computing_molecular_graphics     'SHELXTL (Sheldrick, 2008)' 
_computing_publication_material   'SHELXTL (Sheldrick, 2008)' 
  
_refine_special_details 
; 
 Refinement of F^2^ against ALL reflections.  The weighted R-factor wR and 
 goodness of fit S are based on F^2^, conventional R-factors R are based 
 on F, with F set to zero for negative F^2^. The threshold expression of 
 F^2^ > 2sigma(F^2^) is used only for calculating R-factors(gt) etc. and is 
 not relevant to the choice of reflections for refinement.  R-factors based 
 on F^2^ are statistically about twice as large as those based on F, and R- 
 factors based on ALL data will be even larger. 
; 
  
_refine_ls_structure_factor_coef  Fsqd 
_refine_ls_matrix_type            full 
_refine_ls_weighting_scheme       calc 
_refine_ls_weighting_details 
 'calc w=1/[\s^2^(Fo^2^)+(0.0532P)^2^+0.2522P] where P=(Fo^2^+2Fc^2^)/3' 
_atom_sites_solution_primary      direct 
_atom_sites_solution_secondary    difmap 
_atom_sites_solution_hydrogens    geom 
_refine_ls_hydrogen_treatment     constr 
_refine_ls_extinction_method      none 
_refine_ls_extinction_coef        ? 
_refine_ls_number_reflns          16927 
_refine_ls_number_parameters      393 
_refine_ls_number_restraints      0 
_refine_ls_R_factor_all           0.0536 
_refine_ls_R_factor_gt            0.0394 
_refine_ls_wR_factor_ref          0.1061 
_refine_ls_wR_factor_gt           0.0985 
_refine_ls_goodness_of_fit_ref    1.036 
_refine_ls_restrained_S_all       1.036 
_refine_ls_shift/su_max           0.001 
_refine_ls_shift/su_mean          0.000 
  
loop_ 
 _atom_site_label 
 _atom_site_type_symbol 
 _atom_site_fract_x 
 _atom_site_fract_y 
 _atom_site_fract_z 
 _atom_site_U_iso_or_equiv 
 _atom_site_adp_type 
 _atom_site_occupancy 
 _atom_site_symmetry_multiplicity 
 _atom_site_calc_flag 
 _atom_site_refinement_flags 
 _atom_site_disorder_assembly 
 _atom_site_disorder_group 
Co1 Co 0.240864(14) 0.083596(10) 0.206332(8) 0.01082(3) Uani 1 1 d . . . 
C1 C 0.07643(12) -0.02813(9) 0.13950(7) 0.01740(17) Uani 1 1 d . . . 
O1 O -0.03631(10) -0.09124(8) 0.09474(6) 0.02771(18) Uani 1 1 d . . . 
C2 C 0.11436(11) 0.15802(8) 0.20936(7) 0.01695(17) Uani 1 1 d . . . 
O2 O 0.01837(9) 0.19425(7) 0.21075(6) 0.02624(18) Uani 1 1 d . . . 
N11 N 0.41688(9) 0.22507(6) 0.26144(5) 0.01084(12) Uani 1 1 d . . . 
N21 N 0.34679(9) -0.02134(6) 0.21988(5) 0.01115(12) Uani 1 1 d . . . 
C11 C 0.71035(10) 0.34976(8) 0.31602(6) 0.01359(15) Uani 1 1 d . . . 
C21 C 0.56217(10) 0.23297(8) 0.28336(6) 0.01163(14) Uani 1 1 d . . . 
C31 C 0.59549(11) 0.13058(8) 0.27440(6) 0.01430(15) Uani 1 1 d . . . 
H31A H 0.7023 0.1448 0.2855 0.017 Uiso 1 1 calc R . . 
C41 C 0.49664(10) 0.01058(8) 0.25174(6) 0.01204(14) Uani 1 1 d . . . 
C51 C 0.58181(11) -0.07405(8) 0.26972(6) 0.01382(15) Uani 1 1 d . . . 
C61 C 0.81585(13) 0.33523(9) 0.39189(8) 0.0227(2) Uani 1 1 d . . . 
H61A H 0.9015 0.4114 0.4160 0.034 Uiso 1 1 calc R . . 
H61B H 0.8569 0.2761 0.3713 0.034 Uiso 1 1 calc R . . 
H61C H 0.7560 0.3090 0.4364 0.034 Uiso 1 1 calc R . . 
C71 C 0.79797(12) 0.36835(9) 0.24060(7) 0.01872(17) Uani 1 1 d . . . 
H71A H 0.8982 0.4346 0.2603 0.028 Uiso 1 1 calc R . . 
H71B H 0.7374 0.3862 0.1942 0.028 Uiso 1 1 calc R . . 
H71C H 0.8140 0.2960 0.2194 0.028 Uiso 1 1 calc R . . 
C81 C 0.69043(11) 0.46604(8) 0.34791(7) 0.01622(16) Uani 1 1 d . . . 
H81A H 0.7922 0.5305 0.3676 0.024 Uiso 1 1 calc R . . 
H81B H 0.6339 0.4568 0.3956 0.024 Uiso 1 1 calc R . . 
H81C H 0.6325 0.4849 0.3008 0.024 Uiso 1 1 calc R . . 
C91 C 0.66400(13) -0.03483(9) 0.36495(7) 0.02033(19) Uani 1 1 d . . . 
H91A H 0.7164 -0.0875 0.3784 0.031 Uiso 1 1 calc R . . 
H91B H 0.5877 -0.0389 0.4020 0.031 Uiso 1 1 calc R . . 
H91C H 0.7400 0.0468 0.3748 0.031 Uiso 1 1 calc R . . 
C101 C 0.48736(12) -0.20786(8) 0.25757(7) 0.01764(17) Uani 1 1 d . . . 
H10A H 0.5559 -0.2477 0.2746 0.026 Uiso 1 1 calc R . . 
H10B H 0.4382 -0.2400 0.1970 0.026 Uiso 1 1 calc R . . 
H10C H 0.4078 -0.2212 0.2933 0.026 Uiso 1 1 calc R . . 
C111 C 0.70216(12) -0.06043(10) 0.21120(8) 0.02025(18) Uani 1 1 d . . . 
H11A H 0.7555 -0.1137 0.2211 0.030 Uiso 1 1 calc R . . 
H11B H 0.7773 0.0218 0.2243 0.030 Uiso 1 1 calc R . . 
H11C H 0.6504 -0.0807 0.1509 0.030 Uiso 1 1 calc R . . 
C12 C 0.37242(10) 0.32446(7) 0.28374(6) 0.01154(14) Uani 1 1 d . . . 
C22 C 0.31737(11) 0.33650(8) 0.36092(6) 0.01377(15) Uani 1 1 d . . . 
C32 C 0.26029(12) 0.42527(9) 0.37831(7) 0.01776(17) Uani 1 1 d . . . 
H32A H 0.2259 0.4366 0.4310 0.021 Uiso 1 1 calc R . . 
C42 C 0.25285(12) 0.49740(9) 0.31986(7) 0.01942(18) Uani 1 1 d . . . 
H42A H 0.2136 0.5574 0.3327 0.023 Uiso 1 1 calc R . . 
C52 C 0.30274(12) 0.48174(8) 0.24303(7) 0.01729(17) Uani 1 1 d . . . 
H52A H 0.2950 0.5302 0.2028 0.021 Uiso 1 1 calc R . . 
C62 C 0.36432(11) 0.39624(8) 0.22328(6) 0.01322(15) Uani 1 1 d . . . 
C72 C 0.31129(12) 0.25232(9) 0.42283(6) 0.01715(17) Uani 1 1 d . . . 
H72A H 0.3245 0.1815 0.3918 0.021 Uiso 1 1 calc R . . 
C82 C 0.15637(15) 0.20925(12) 0.45248(9) 0.0300(3) Uani 1 1 d . . . 
H82A H 0.0725 0.1780 0.4022 0.045 Uiso 1 1 calc R . . 
H82B H 0.1463 0.2756 0.4892 0.045 Uiso 1 1 calc R . . 
H82C H 0.1509 0.1465 0.4850 0.045 Uiso 1 1 calc R . . 
C92 C 0.44140(15) 0.30918(12) 0.50154(8) 0.0300(3) Uani 1 1 d . . . 
H92A H 0.5412 0.3271 0.4832 0.045 Uiso 1 1 calc R . . 
H92B H 0.4302 0.2542 0.5413 0.045 Uiso 1 1 calc R . . 
H92C H 0.4361 0.3827 0.5305 0.045 Uiso 1 1 calc R . . 
C102 C 0.41548(12) 0.38109(8) 0.13759(6) 0.01650(16) Uani 1 1 d . . . 
H10D H 0.4691 0.3246 0.1385 0.020 Uiso 1 1 calc R . . 
C112 C 0.27738(15) 0.32769(11) 0.06304(7) 0.0276(2) Uani 1 1 d . . . 
H11D H 0.2100 0.2491 0.0702 0.041 Uiso 1 1 calc R . . 
H11E H 0.3141 0.3203 0.0086 0.041 Uiso 1 1 calc R . . 
H11F H 0.2195 0.3795 0.0625 0.041 Uiso 1 1 calc R . . 
C122 C 0.52971(14) 0.49822(10) 0.12181(7) 0.0231(2) Uani 1 1 d . . . 
H12A H 0.6151 0.5345 0.1712 0.035 Uiso 1 1 calc R . . 
H12B H 0.4767 0.5523 0.1143 0.035 Uiso 1 1 calc R . . 
H12C H 0.5702 0.4826 0.0698 0.035 Uiso 1 1 calc R . . 
C13 C 0.24384(10) -0.14439(7) 0.19268(6) 0.01199(14) Uani 1 1 d . . . 
C23 C 0.14911(11) -0.19934(8) 0.24854(6) 0.01378(15) Uani 1 1 d . . . 
C33 C 0.03764(13) -0.31336(9) 0.21742(7) 0.01968(18) Uani 1 1 d . . . 
H33A H -0.0275 -0.3516 0.2542 0.024 Uiso 1 1 calc R . . 
C43 C 0.01974(14) -0.37218(9) 0.13390(7) 0.0240(2) Uani 1 1 d . . . 
H43A H -0.0573 -0.4497 0.1137 0.029 Uiso 1 1 calc R . . 
C53 C 0.11510(13) -0.31712(9) 0.07998(7) 0.02092(19) Uani 1 1 d . . . 
H53A H 0.1028 -0.3578 0.0229 0.025 Uiso 1 1 calc R . . 
C63 C 0.22889(11) -0.20295(8) 0.10808(6) 0.01467(15) Uani 1 1 d . . . 
C73 C 0.16379(12) -0.13723(8) 0.34025(6) 0.01523(15) Uani 1 1 d . . . 
H73A H 0.2564 -0.0610 0.3526 0.018 Uiso 1 1 calc R . . 
C83 C 0.18594(15) -0.21036(10) 0.40712(7) 0.0227(2) Uani 1 1 d . . . 
H83A H 0.2771 -0.2289 0.4014 0.034 Uiso 1 1 calc R . . 
H83B H 0.0946 -0.2843 0.3977 0.034 Uiso 1 1 calc R . . 
H83C H 0.2002 -0.1647 0.4650 0.034 Uiso 1 1 calc R . . 
C93 C 0.02246(15) -0.10737(12) 0.35017(8) 0.0258(2) Uani 1 1 d . . . 
H93A H 0.0138 -0.0541 0.3115 0.039 Uiso 1 1 calc R . . 
H93B H 0.0336 -0.0683 0.4097 0.039 Uiso 1 1 calc R . . 
H93C H -0.0706 -0.1805 0.3357 0.039 Uiso 1 1 calc R . . 
C103 C 0.33078(13) -0.14585(9) 0.04689(6) 0.01818(17) Uani 1 1 d . . . 
H10E H 0.4164 -0.0722 0.0810 0.022 Uiso 1 1 calc R . . 
C113 C 0.24154(17) -0.11009(13) -0.02348(8) 0.0306(3) Uani 1 1 d . . . 
H11G H 0.2108 -0.0473 0.0026 0.046 Uiso 1 1 calc R . . 
H11H H 0.1493 -0.1791 -0.0531 0.046 Uiso 1 1 calc R . . 
H11I H 0.3075 -0.0810 -0.0649 0.046 Uiso 1 1 calc R . . 
C123 C 0.40343(17) -0.22720(12) 0.00501(8) 0.0284(2) Uani 1 1 d . . . 
H12D H 0.4563 -0.2534 0.0498 0.043 Uiso 1 1 calc R . . 
H12E H 0.4780 -0.1837 -0.0280 0.043 Uiso 1 1 calc R . . 
H12F H 0.3225 -0.2965 -0.0335 0.043 Uiso 1 1 calc R . . 
  
loop_ 
 _atom_site_aniso_label 
 _atom_site_aniso_U_11 
 _atom_site_aniso_U_22 
 _atom_site_aniso_U_33 
 _atom_site_aniso_U_23 
 _atom_site_aniso_U_13 
 _atom_site_aniso_U_12 
Co1 0.00983(5) 0.00959(5) 0.01264(6) 0.00229(4) 0.00070(4) 0.00370(4) 
C1 0.0158(4) 0.0153(4) 0.0204(4) 0.0004(3) 0.0004(3) 0.0072(3) 
O1 0.0191(4) 0.0237(4) 0.0333(5) -0.0069(3) -0.0067(3) 0.0083(3) 
C2 0.0133(4) 0.0124(3) 0.0222(4) 0.0014(3) -0.0009(3) 0.0036(3) 
O2 0.0145(3) 0.0185(3) 0.0431(5) -0.0004(3) -0.0013(3) 0.0078(3) 
N11 0.0109(3) 0.0099(3) 0.0122(3) 0.0030(2) 0.0023(2) 0.0042(2) 
N21 0.0115(3) 0.0096(3) 0.0123(3) 0.0029(2) 0.0022(2) 0.0037(2) 
C11 0.0112(4) 0.0115(3) 0.0163(4) 0.0033(3) 0.0006(3) 0.0028(3) 
C21 0.0108(3) 0.0110(3) 0.0130(3) 0.0040(3) 0.0021(3) 0.0035(3) 
C31 0.0107(4) 0.0112(3) 0.0213(4) 0.0049(3) 0.0021(3) 0.0042(3) 
C41 0.0114(3) 0.0112(3) 0.0148(4) 0.0043(3) 0.0033(3) 0.0049(3) 
C51 0.0132(4) 0.0116(3) 0.0189(4) 0.0056(3) 0.0037(3) 0.0061(3) 
C61 0.0190(5) 0.0184(4) 0.0264(5) 0.0050(4) -0.0064(4) 0.0051(3) 
C71 0.0160(4) 0.0144(4) 0.0249(5) 0.0046(3) 0.0076(3) 0.0033(3) 
C81 0.0143(4) 0.0118(3) 0.0195(4) 0.0010(3) 0.0009(3) 0.0030(3) 
C91 0.0224(5) 0.0187(4) 0.0210(5) 0.0061(3) -0.0007(4) 0.0100(4) 
C101 0.0179(4) 0.0126(3) 0.0247(5) 0.0069(3) 0.0043(3) 0.0073(3) 
C111 0.0180(4) 0.0208(4) 0.0286(5) 0.0106(4) 0.0103(4) 0.0113(4) 
C12 0.0112(3) 0.0100(3) 0.0133(3) 0.0020(3) 0.0016(3) 0.0043(3) 
C22 0.0138(4) 0.0128(3) 0.0142(4) 0.0017(3) 0.0032(3) 0.0046(3) 
C32 0.0174(4) 0.0165(4) 0.0199(4) 0.0002(3) 0.0055(3) 0.0077(3) 
C42 0.0192(4) 0.0142(4) 0.0262(5) 0.0011(3) 0.0035(4) 0.0092(3) 
C52 0.0187(4) 0.0123(3) 0.0218(4) 0.0041(3) 0.0014(3) 0.0076(3) 
C62 0.0142(4) 0.0108(3) 0.0143(4) 0.0031(3) 0.0010(3) 0.0048(3) 
C72 0.0214(4) 0.0164(4) 0.0147(4) 0.0047(3) 0.0070(3) 0.0067(3) 
C82 0.0239(6) 0.0358(6) 0.0308(6) 0.0161(5) 0.0120(5) 0.0066(5) 
C92 0.0272(6) 0.0351(6) 0.0236(5) 0.0142(5) -0.0010(4) 0.0062(5) 
C102 0.0211(4) 0.0153(4) 0.0143(4) 0.0060(3) 0.0037(3) 0.0073(3) 
C112 0.0305(6) 0.0289(5) 0.0158(5) 0.0043(4) -0.0007(4) 0.0043(4) 
C122 0.0282(5) 0.0201(4) 0.0210(5) 0.0102(4) 0.0069(4) 0.0063(4) 
C13 0.0126(4) 0.0095(3) 0.0132(3) 0.0026(3) 0.0016(3) 0.0036(3) 
C23 0.0145(4) 0.0122(3) 0.0145(4) 0.0044(3) 0.0032(3) 0.0043(3) 
C33 0.0198(4) 0.0140(4) 0.0207(4) 0.0051(3) 0.0048(3) 0.0003(3) 
C43 0.0265(5) 0.0135(4) 0.0225(5) 0.0013(3) 0.0019(4) -0.0016(4) 
C53 0.0264(5) 0.0144(4) 0.0165(4) -0.0007(3) 0.0015(4) 0.0036(3) 
C63 0.0182(4) 0.0127(3) 0.0123(4) 0.0021(3) 0.0024(3) 0.0053(3) 
C73 0.0179(4) 0.0150(4) 0.0144(4) 0.0048(3) 0.0062(3) 0.0065(3) 
C83 0.0318(6) 0.0251(5) 0.0162(4) 0.0081(4) 0.0063(4) 0.0146(4) 
C93 0.0300(6) 0.0342(6) 0.0249(5) 0.0129(4) 0.0138(4) 0.0206(5) 
C103 0.0227(5) 0.0186(4) 0.0140(4) 0.0031(3) 0.0062(3) 0.0080(3) 
C113 0.0366(7) 0.0412(7) 0.0219(5) 0.0176(5) 0.0102(5) 0.0184(6) 
C123 0.0378(7) 0.0296(6) 0.0231(5) 0.0034(4) 0.0135(5) 0.0175(5) 
  
_geom_special_details 
; 
 All esds (except the esd in the dihedral angle between two l.s. planes) 
 are estimated using the full covariance matrix.  The cell esds are taken 
 into account individually in the estimation of esds in distances, angles 
 and torsion angles; correlations between esds in cell parameters are only 
 used when they are defined by crystal symmetry.  An approximate (isotropic) 
 treatment of cell esds is used for estimating esds involving l.s. planes. 
; 
  
loop_ 
 _geom_bond_atom_site_label_1 
 _geom_bond_atom_site_label_2 
 _geom_bond_distance 
 _geom_bond_site_symmetry_2 
 _geom_bond_publ_flag 
Co1 C2 1.7531(10) . ? 
Co1 C1 1.7590(10) . ? 
Co1 N21 1.9209(8) . ? 
Co1 N11 1.9250(8) . ? 
C1 O1 1.1461(12) . ? 
C2 O2 1.1491(12) . ? 
N11 C21 1.3405(12) . ? 
N11 C12 1.4473(11) . ? 
N21 C41 1.3370(12) . ? 
N21 C13 1.4439(11) . ? 
C11 C81 1.5390(13) . ? 
C11 C71 1.5415(14) . ? 
C11 C61 1.5472(14) . ? 
C11 C21 1.5696(12) . ? 
C21 C31 1.4013(12) . ? 
C31 C41 1.4013(12) . ? 
C31 H31A 0.9500 . ? 
C41 C51 1.5674(12) . ? 
C51 C101 1.5369(13) . ? 
C51 C111 1.5378(14) . ? 
C51 C91 1.5461(14) . ? 
C61 H61A 0.9800 . ? 
C61 H61B 0.9800 . ? 
C61 H61C 0.9800 . ? 
C71 H71A 0.9800 . ? 
C71 H71B 0.9800 . ? 
C71 H71C 0.9800 . ? 
C81 H81A 0.9800 . ? 
C81 H81B 0.9800 . ? 
C81 H81C 0.9800 . ? 
C91 H91A 0.9800 . ? 
C91 H91B 0.9800 . ? 
C91 H91C 0.9800 . ? 
C101 H10A 0.9800 . ? 
C101 H10B 0.9800 . ? 
C101 H10C 0.9800 . ? 
C111 H11A 0.9800 . ? 
C111 H11B 0.9800 . ? 
C111 H11C 0.9800 . ? 
C12 C22 1.4061(13) . ? 
C12 C62 1.4119(12) . ? 
C22 C32 1.3956(13) . ? 
C22 C72 1.5224(13) . ? 
C32 C42 1.3894(15) . ? 
C32 H32A 0.9500 . ? 
C42 C52 1.3820(16) . ? 
C42 H42A 0.9500 . ? 
C52 C62 1.3956(13) . ? 
C52 H52A 0.9500 . ? 
C62 C102 1.5170(14) . ? 
C72 C82 1.5266(16) . ? 
C72 C92 1.5303(16) . ? 
C72 H72A 1.0000 . ? 
C82 H82A 0.9800 . ? 
C82 H82B 0.9800 . ? 
C82 H82C 0.9800 . ? 
C92 H92A 0.9800 . ? 
C92 H92B 0.9800 . ? 
C92 H92C 0.9800 . ? 
C102 C112 1.5297(15) . ? 
C102 C122 1.5352(15) . ? 
C102 H10D 1.0000 . ? 
C112 H11D 0.9800 . ? 
C112 H11E 0.9800 . ? 
C112 H11F 0.9800 . ? 
C122 H12A 0.9800 . ? 
C122 H12B 0.9800 . ? 
C122 H12C 0.9800 . ? 
C13 C63 1.4067(13) . ? 
C13 C23 1.4085(13) . ? 
C23 C33 1.3935(13) . ? 
C23 C73 1.5222(13) . ? 
C33 C43 1.3872(16) . ? 
C33 H33A 0.9500 . ? 
C43 C53 1.3883(16) . ? 
C43 H43A 0.9500 . ? 
C53 C63 1.3975(14) . ? 
C53 H53A 0.9500 . ? 
C63 C103 1.5206(14) . ? 
C73 C93 1.5295(15) . ? 
C73 C83 1.5332(14) . ? 
C73 H73A 1.0000 . ? 
C83 H83A 0.9800 . ? 
C83 H83B 0.9800 . ? 
C83 H83C 0.9800 . ? 
C93 H93A 0.9800 . ? 
C93 H93B 0.9800 . ? 
C93 H93C 0.9800 . ? 
C103 C113 1.5324(16) . ? 
C103 C123 1.5335(16) . ? 
C103 H10E 1.0000 . ? 
C113 H11G 0.9800 . ? 
C113 H11H 0.9800 . ? 
C113 H11I 0.9800 . ? 
C123 H12D 0.9800 . ? 
C123 H12E 0.9800 . ? 
C123 H12F 0.9800 . ? 
  
loop_ 
 _geom_angle_atom_site_label_1 
 _geom_angle_atom_site_label_2 
 _geom_angle_atom_site_label_3 
 _geom_angle 
 _geom_angle_site_symmetry_1 
 _geom_angle_site_symmetry_3 
 _geom_angle_publ_flag 
C2 Co1 C1 81.37(4) . . ? 
C2 Co1 N21 165.69(4) . . ? 
C1 Co1 N21 93.62(4) . . ? 
C2 Co1 N11 92.55(4) . . ? 
C1 Co1 N11 167.95(4) . . ? 
N21 Co1 N11 94.63(3) . . ? 
O1 C1 Co1 172.50(9) . . ? 
O2 C2 Co1 172.14(9) . . ? 
C21 N11 C12 122.22(7) . . ? 
C21 N11 Co1 126.21(6) . . ? 
C12 N11 Co1 111.40(6) . . ? 
C41 N21 C13 121.73(7) . . ? 
C41 N21 Co1 126.34(6) . . ? 
C13 N21 Co1 111.92(6) . . ? 
C81 C11 C71 107.45(8) . . ? 
C81 C11 C61 105.10(8) . . ? 
C71 C11 C61 108.33(9) . . ? 
C81 C11 C21 118.64(8) . . ? 
C71 C11 C21 106.63(7) . . ? 
C61 C11 C21 110.33(7) . . ? 
N11 C21 C31 120.41(8) . . ? 
N11 C21 C11 126.75(8) . . ? 
C31 C21 C11 112.78(8) . . ? 
C41 C31 C21 130.41(9) . . ? 
C41 C31 H31A 114.8 . . ? 
C21 C31 H31A 114.8 . . ? 
N21 C41 C31 120.65(8) . . ? 
N21 C41 C51 126.83(8) . . ? 
C31 C41 C51 112.52(8) . . ? 
C101 C51 C111 106.31(8) . . ? 
C101 C51 C91 105.16(8) . . ? 
C111 C51 C91 109.66(8) . . ? 
C101 C51 C41 119.32(8) . . ? 
C111 C51 C41 108.46(7) . . ? 
C91 C51 C41 107.69(7) . . ? 
C11 C61 H61A 109.5 . . ? 
C11 C61 H61B 109.5 . . ? 
H61A C61 H61B 109.5 . . ? 
C11 C61 H61C 109.5 . . ? 
H61A C61 H61C 109.5 . . ? 
H61B C61 H61C 109.5 . . ? 
C11 C71 H71A 109.5 . . ? 
C11 C71 H71B 109.5 . . ? 
H71A C71 H71B 109.5 . . ? 
C11 C71 H71C 109.5 . . ? 
H71A C71 H71C 109.5 . . ? 
H71B C71 H71C 109.5 . . ? 
C11 C81 H81A 109.5 . . ? 
C11 C81 H81B 109.5 . . ? 
H81A C81 H81B 109.5 . . ? 
C11 C81 H81C 109.5 . . ? 
H81A C81 H81C 109.5 . . ? 
H81B C81 H81C 109.5 . . ? 
C51 C91 H91A 109.5 . . ? 
C51 C91 H91B 109.5 . . ? 
H91A C91 H91B 109.5 . . ? 
C51 C91 H91C 109.5 . . ? 
H91A C91 H91C 109.5 . . ? 
H91B C91 H91C 109.5 . . ? 
C51 C101 H10A 109.5 . . ? 
C51 C101 H10B 109.5 . . ? 
H10A C101 H10B 109.5 . . ? 
C51 C101 H10C 109.5 . . ? 
H10A C101 H10C 109.5 . . ? 
H10B C101 H10C 109.5 . . ? 
C51 C111 H11A 109.5 . . ? 
C51 C111 H11B 109.5 . . ? 
H11A C111 H11B 109.5 . . ? 
C51 C111 H11C 109.5 . . ? 
H11A C111 H11C 109.5 . . ? 
H11B C111 H11C 109.5 . . ? 
C22 C12 C62 121.32(8) . . ? 
C22 C12 N11 118.23(8) . . ? 
C62 C12 N11 119.83(8) . . ? 
C32 C22 C12 118.20(9) . . ? 
C32 C22 C72 119.75(9) . . ? 
C12 C22 C72 121.98(8) . . ? 
C42 C32 C22 121.14(10) . . ? 
C42 C32 H32A 119.4 . . ? 
C22 C32 H32A 119.4 . . ? 
C52 C42 C32 119.86(9) . . ? 
C52 C42 H42A 120.1 . . ? 
C32 C42 H42A 120.1 . . ? 
C42 C52 C62 121.37(9) . . ? 
C42 C52 H52A 119.3 . . ? 
C62 C52 H52A 119.3 . . ? 
C52 C62 C12 118.03(9) . . ? 
C52 C62 C102 119.50(8) . . ? 
C12 C62 C102 122.45(8) . . ? 
C22 C72 C82 111.87(9) . . ? 
C22 C72 C92 111.89(9) . . ? 
C82 C72 C92 109.26(10) . . ? 
C22 C72 H72A 107.9 . . ? 
C82 C72 H72A 107.9 . . ? 
C92 C72 H72A 107.9 . . ? 
C72 C82 H82A 109.5 . . ? 
C72 C82 H82B 109.5 . . ? 
H82A C82 H82B 109.5 . . ? 
C72 C82 H82C 109.5 . . ? 
H82A C82 H82C 109.5 . . ? 
H82B C82 H82C 109.5 . . ? 
C72 C92 H92A 109.5 . . ? 
C72 C92 H92B 109.5 . . ? 
H92A C92 H92B 109.5 . . ? 
C72 C92 H92C 109.5 . . ? 
H92A C92 H92C 109.5 . . ? 
H92B C92 H92C 109.5 . . ? 
C62 C102 C112 111.39(9) . . ? 
C62 C102 C122 112.27(8) . . ? 
C112 C102 C122 109.63(9) . . ? 
C62 C102 H10D 107.8 . . ? 
C112 C102 H10D 107.8 . . ? 
C122 C102 H10D 107.8 . . ? 
C102 C112 H11D 109.5 . . ? 
C102 C112 H11E 109.5 . . ? 
H11D C112 H11E 109.5 . . ? 
C102 C112 H11F 109.5 . . ? 
H11D C112 H11F 109.5 . . ? 
H11E C112 H11F 109.5 . . ? 
C102 C122 H12A 109.5 . . ? 
C102 C122 H12B 109.5 . . ? 
H12A C122 H12B 109.5 . . ? 
C102 C122 H12C 109.5 . . ? 
H12A C122 H12C 109.5 . . ? 
H12B C122 H12C 109.5 . . ? 
C63 C13 C23 121.34(8) . . ? 
C63 C13 N21 119.26(8) . . ? 
C23 C13 N21 119.07(8) . . ? 
C33 C23 C13 118.20(9) . . ? 
C33 C23 C73 119.79(9) . . ? 
C13 C23 C73 122.00(8) . . ? 
C43 C33 C23 121.39(10) . . ? 
C43 C33 H33A 119.3 . . ? 
C23 C33 H33A 119.3 . . ? 
C33 C43 C53 119.63(9) . . ? 
C33 C43 H43A 120.2 . . ? 
C53 C43 H43A 120.2 . . ? 
C43 C53 C63 121.24(10) . . ? 
C43 C53 H53A 119.4 . . ? 
C63 C53 H53A 119.4 . . ? 
C53 C63 C13 118.18(9) . . ? 
C53 C63 C103 119.54(9) . . ? 
C13 C63 C103 122.28(8) . . ? 
C23 C73 C93 110.77(9) . . ? 
C23 C73 C83 112.87(8) . . ? 
C93 C73 C83 109.21(9) . . ? 
C23 C73 H73A 107.9 . . ? 
C93 C73 H73A 107.9 . . ? 
C83 C73 H73A 107.9 . . ? 
C73 C83 H83A 109.5 . . ? 
C73 C83 H83B 109.5 . . ? 
H83A C83 H83B 109.5 . . ? 
C73 C83 H83C 109.5 . . ? 
H83A C83 H83C 109.5 . . ? 
H83B C83 H83C 109.5 . . ? 
C73 C93 H93A 109.5 . . ? 
C73 C93 H93B 109.5 . . ? 
H93A C93 H93B 109.5 . . ? 
C73 C93 H93C 109.5 . . ? 
H93A C93 H93C 109.5 . . ? 
H93B C93 H93C 109.5 . . ? 
C63 C103 C113 111.67(9) . . ? 
C63 C103 C123 112.04(9) . . ? 
C113 C103 C123 109.29(10) . . ? 
C63 C103 H10E 107.9 . . ? 
C113 C103 H10E 107.9 . . ? 
C123 C103 H10E 107.9 . . ? 
C103 C113 H11G 109.5 . . ? 
C103 C113 H11H 109.5 . . ? 
H11G C113 H11H 109.5 . . ? 
C103 C113 H11I 109.5 . . ? 
H11G C113 H11I 109.5 . . ? 
H11H C113 H11I 109.5 . . ? 
C103 C123 H12D 109.5 . . ? 
C103 C123 H12E 109.5 . . ? 
H12D C123 H12E 109.5 . . ? 
C103 C123 H12F 109.5 . . ? 
H12D C123 H12F 109.5 . . ? 
H12E C123 H12F 109.5 . . ? 
  
loop_ 
 _geom_torsion_atom_site_label_1 
 _geom_torsion_atom_site_label_2 
 _geom_torsion_atom_site_label_3 
 _geom_torsion_atom_site_label_4 
 _geom_torsion 
 _geom_torsion_site_symmetry_1 
 _geom_torsion_site_symmetry_2 
 _geom_torsion_site_symmetry_3 
 _geom_torsion_site_symmetry_4 
 _geom_torsion_publ_flag 
C2 Co1 C1 O1 20.2(8) . . . . ? 
N21 Co1 C1 O1 -173.3(8) . . . . ? 
N11 Co1 C1 O1 -40.1(9) . . . . ? 
C1 Co1 C2 O2 33.8(7) . . . . ? 
N21 Co1 C2 O2 -36.6(8) . . . . ? 
N11 Co1 C2 O2 -156.7(7) . . . . ? 
C2 Co1 N11 C21 177.70(8) . . . . ? 
C1 Co1 N11 C21 -123.04(19) . . . . ? 
N21 Co1 N11 C21 10.09(8) . . . . ? 
C2 Co1 N11 C12 2.32(7) . . . . ? 
C1 Co1 N11 C12 61.6(2) . . . . ? 
N21 Co1 N11 C12 -165.29(6) . . . . ? 
C2 Co1 N21 C41 -124.74(16) . . . . ? 
C1 Co1 N21 C41 166.38(8) . . . . ? 
N11 Co1 N21 C41 -4.84(8) . . . . ? 
C2 Co1 N21 C13 54.05(18) . . . . ? 
C1 Co1 N21 C13 -14.83(7) . . . . ? 
N11 Co1 N21 C13 173.95(6) . . . . ? 
C12 N11 C21 C31 168.57(8) . . . . ? 
Co1 N11 C21 C31 -6.34(13) . . . . ? 
C12 N11 C21 C11 -14.52(14) . . . . ? 
Co1 N11 C21 C11 170.57(7) . . . . ? 
C81 C11 C21 N11 16.20(14) . . . . ? 
C71 C11 C21 N11 -105.11(10) . . . . ? 
C61 C11 C21 N11 137.46(10) . . . . ? 
C81 C11 C21 C31 -166.69(8) . . . . ? 
C71 C11 C21 C31 71.99(10) . . . . ? 
C61 C11 C21 C31 -45.43(11) . . . . ? 
N11 C21 C31 C41 -6.50(16) . . . . ? 
C11 C21 C31 C41 176.18(10) . . . . ? 
C13 N21 C41 C31 177.36(8) . . . . ? 
Co1 N21 C41 C31 -3.96(13) . . . . ? 
C13 N21 C41 C51 -3.76(14) . . . . ? 
Co1 N21 C41 C51 174.92(7) . . . . ? 
C21 C31 C41 N21 11.98(16) . . . . ? 
C21 C31 C41 C51 -167.05(10) . . . . ? 
N21 C41 C51 C101 -5.37(14) . . . . ? 
C31 C41 C51 C101 173.59(9) . . . . ? 
N21 C41 C51 C111 116.43(10) . . . . ? 
C31 C41 C51 C111 -64.61(11) . . . . ? 
N21 C41 C51 C91 -124.96(10) . . . . ? 
C31 C41 C51 C91 54.00(11) . . . . ? 
C21 N11 C12 C22 -92.34(11) . . . . ? 
Co1 N11 C12 C22 83.25(9) . . . . ? 
C21 N11 C12 C62 96.53(11) . . . . ? 
Co1 N11 C12 C62 -87.87(9) . . . . ? 
C62 C12 C22 C32 -2.80(13) . . . . ? 
N11 C12 C22 C32 -173.78(8) . . . . ? 
C62 C12 C22 C72 174.13(9) . . . . ? 
N11 C12 C22 C72 3.15(13) . . . . ? 
C12 C22 C32 C42 2.17(15) . . . . ? 
C72 C22 C32 C42 -174.83(9) . . . . ? 
C22 C32 C42 C52 -0.07(16) . . . . ? 
C32 C42 C52 C62 -1.50(16) . . . . ? 
C42 C52 C62 C12 0.88(14) . . . . ? 
C42 C52 C62 C102 179.14(9) . . . . ? 
C22 C12 C62 C52 1.31(13) . . . . ? 
N11 C12 C62 C52 172.15(8) . . . . ? 
C22 C12 C62 C102 -176.90(9) . . . . ? 
N11 C12 C62 C102 -6.05(13) . . . . ? 
C32 C22 C72 C82 43.71(13) . . . . ? 
C12 C22 C72 C82 -133.18(10) . . . . ? 
C32 C22 C72 C92 -79.27(12) . . . . ? 
C12 C22 C72 C92 103.85(11) . . . . ? 
C52 C62 C102 C112 -69.64(12) . . . . ? 
C12 C62 C102 C112 108.54(11) . . . . ? 
C52 C62 C102 C122 53.74(12) . . . . ? 
C12 C62 C102 C122 -128.08(10) . . . . ? 
C41 N21 C13 C63 -87.20(11) . . . . ? 
Co1 N21 C13 C63 93.94(9) . . . . ? 
C41 N21 C13 C23 99.25(11) . . . . ? 
Co1 N21 C13 C23 -79.60(9) . . . . ? 
C63 C13 C23 C33 -0.98(14) . . . . ? 
N21 C13 C23 C33 172.43(9) . . . . ? 
C63 C13 C23 C73 180.00(8) . . . . ? 
N21 C13 C23 C73 -6.59(13) . . . . ? 
C13 C23 C33 C43 0.22(16) . . . . ? 
C73 C23 C33 C43 179.26(10) . . . . ? 
C23 C33 C43 C53 0.39(18) . . . . ? 
C33 C43 C53 C63 -0.26(18) . . . . ? 
C43 C53 C63 C13 -0.47(16) . . . . ? 
C43 C53 C63 C103 -179.95(10) . . . . ? 
C23 C13 C63 C53 1.10(14) . . . . ? 
N21 C13 C63 C53 -172.29(9) . . . . ? 
C23 C13 C63 C103 -179.44(9) . . . . ? 
N21 C13 C63 C103 7.17(13) . . . . ? 
C33 C23 C73 C93 -68.13(12) . . . . ? 
C13 C23 C73 C93 110.87(10) . . . . ? 
C33 C23 C73 C83 54.68(13) . . . . ? 
C13 C23 C73 C83 -126.32(10) . . . . ? 
C53 C63 C103 C113 71.92(13) . . . . ? 
C13 C63 C103 C113 -107.54(11) . . . . ? 
C53 C63 C103 C123 -51.06(13) . . . . ? 
C13 C63 C103 C123 129.49(10) . . . . ? 
  
_diffrn_measured_fraction_theta_max    0.982 
_diffrn_reflns_theta_full              37.04 
_diffrn_measured_fraction_theta_full   0.982 
_refine_diff_density_max    0.711 
_refine_diff_density_min   -0.351 
_refine_diff_density_rms    0.073 
#===END
_publ_section_references
;
Altomare, A., Burla, M. C., Camalli, M., Cascarano, G. L., Giacovazzo, C.,
Guagliardi, A., Moliterni, A. G. G., Polidori, G., Spagna, R (1999).
SIR97, J. Appl. Cryst. 32, 115-119.

Bruker (2009). SAINT V7.68A, Bruker AXS, Inc., Madison, WI, USA.

Bruker (2010). APEX2 V2010.7-0, Bruker AXS, Inc., Madison, WI, USA.

Sheldrick, G. M. (2008). SADABS V2008/1, University of G\"ottingen, Germany.

Sheldrick, G. M. (2008). Acta Cryst. A64, 112-122.
;
 
data_L(tBu)CoPh 
  
_audit_creation_method            SHELXL-97 
_chemical_name_systematic 
; 
 ? 
; 
_chemical_name_common             L(tBu)CoPh 
_chemical_melting_point           ? 
_chemical_formula_moiety          'C41 H58 Co N2' 
_chemical_formula_sum             'C41 H58 Co N2' 
_chemical_formula_weight          637.82 
  
loop_ 
 _atom_type_symbol 
 _atom_type_description 
 _atom_type_scat_dispersion_real 
 _atom_type_scat_dispersion_imag 
 _atom_type_scat_source 
 'C'  'C'   0.0033   0.0016 
 'International Tables Vol C Tables 4.2.6.8 and 6.1.1.4' 
 'H'  'H'   0.0000   0.0000 
 'International Tables Vol C Tables 4.2.6.8 and 6.1.1.4' 
 'N'  'N'   0.0061   0.0033 
 'International Tables Vol C Tables 4.2.6.8 and 6.1.1.4' 
 'Co'  'Co'   0.3494   0.9721 
 'International Tables Vol C Tables 4.2.6.8 and 6.1.1.4' 
  
_symmetry_cell_setting            orthorhombic 
_symmetry_space_group_name_H-M    'P c a 21' 
  
loop_ 
 _symmetry_equiv_pos_as_xyz 
 'x, y, z' 
 '-x, -y, z+1/2' 
 'x+1/2, -y, z' 
 '-x+1/2, y, z+1/2' 
  
_cell_length_a                    17.236(3) 
_cell_length_b                    12.3908(19) 
_cell_length_c                    17.302(3) 
_cell_angle_alpha                 90.00 
_cell_angle_beta                  90.00 
_cell_angle_gamma                 90.00 
_cell_volume                      3695.3(10) 
_cell_formula_units_Z             4 
_cell_measurement_temperature     100.0(1) 
_cell_measurement_reflns_used     3792 
_cell_measurement_theta_min       2.34 
_cell_measurement_theta_max       27.43 
  
_exptl_crystal_description        rod 
_exptl_crystal_colour             red-orange 
_exptl_crystal_size_max           0.24 
_exptl_crystal_size_mid           0.14 
_exptl_crystal_size_min           0.08 
_exptl_crystal_density_meas       ? 
_exptl_crystal_density_diffrn     1.146 
_exptl_crystal_density_method     'not measured' 
_exptl_crystal_F_000              1380 
_exptl_absorpt_coefficient_mu     0.493 
_exptl_absorpt_correction_type    multi-scan 
_exptl_absorpt_correction_T_min   0.8908 
_exptl_absorpt_correction_T_max   0.9616 
_exptl_absorpt_process_details    'SADABS (Sheldrick, 2008)' 
  
_exptl_special_details 
; 
 ? 
; 
  
_diffrn_ambient_temperature       100.0(1) 
_diffrn_radiation_wavelength      0.71073 
_diffrn_radiation_type            MoK\a 
_diffrn_radiation_source          'fine-focus sealed tube' 
_diffrn_radiation_monochromator   graphite 
_diffrn_measurement_device_type   'Bruker SMART APEX II CCD Platform' 
_diffrn_measurement_method        'area detector, \w scans per \f' 
_diffrn_detector_area_resol_mean  ? 
_diffrn_standards_number          0 
_diffrn_standards_interval_count  ? 
_diffrn_standards_interval_time   ? 
_diffrn_standards_decay_%         ? 
_diffrn_reflns_number             55773 
_diffrn_reflns_av_R_equivalents   0.0798 
_diffrn_reflns_av_sigmaI/netI     0.0643 
_diffrn_reflns_limit_h_min        -24 
_diffrn_reflns_limit_h_max        24 
_diffrn_reflns_limit_k_min        -17 
_diffrn_reflns_limit_k_max        17 
_diffrn_reflns_limit_l_min        -24 
_diffrn_reflns_limit_l_max        24 
_diffrn_reflns_theta_min          1.64 
_diffrn_reflns_theta_max          30.50 
_reflns_number_total              11084 
_reflns_number_gt                 8044 
_reflns_threshold_expression      >2sigma(I) 
  
_computing_data_collection        'APEX2 (Bruker, 2010)' 
_computing_cell_refinement        'SAINT (Bruker, 2009)' 
_computing_data_reduction         'SAINT (Bruker, 2009)' 
_computing_structure_solution     'SIR97 (Altomare et al., 1999)' 
_computing_structure_refinement   'SHELXL-97 (Sheldrick, 2008)' 
_computing_molecular_graphics     'SHELXTL (Sheldrick, 2008)' 
_computing_publication_material   'SHELXTL (Sheldrick, 2008)' 
  
_refine_special_details 
; 
 Refinement of F^2^ against ALL reflections.  The weighted R-factor wR and 
 goodness of fit S are based on F^2^, conventional R-factors R are based 
 on F, with F set to zero for negative F^2^. The threshold expression of 
 F^2^ > 2sigma(F^2^) is used only for calculating R-factors(gt) etc. and is 
 not relevant to the choice of reflections for refinement.  R-factors based 
 on F^2^ are statistically about twice as large as those based on F, and R- 
 factors based on ALL data will be even larger. 
; 
  
_refine_ls_structure_factor_coef  Fsqd 
_refine_ls_matrix_type            full 
_refine_ls_weighting_scheme       calc 
_refine_ls_weighting_details 
 'calc w=1/[\s^2^(Fo^2^)+(0.0514P)^2^+0.2429P] where P=(Fo^2^+2Fc^2^)/3' 
_atom_sites_solution_primary      direct 
_atom_sites_solution_secondary    difmap 
_atom_sites_solution_hydrogens    geom 
_refine_ls_hydrogen_treatment     constr 
_refine_ls_extinction_method      none 
_refine_ls_extinction_coef        ? 
_refine_ls_abs_structure_details 
 'Flack H D (1983), 5282 Friedel pairs, Acta Cryst. A39, 876-881' 
_refine_ls_abs_structure_Flack    -0.009(12) 
_refine_ls_number_reflns          11084 
_refine_ls_number_parameters      411 
_refine_ls_number_restraints      1 
_refine_ls_R_factor_all           0.0802 
_refine_ls_R_factor_gt            0.0470 
_refine_ls_wR_factor_ref          0.1112 
_refine_ls_wR_factor_gt           0.0977 
_refine_ls_goodness_of_fit_ref    1.021 
_refine_ls_restrained_S_all       1.021 
_refine_ls_shift/su_max           0.000 
_refine_ls_shift/su_mean          0.000 
  
loop_ 
 _atom_site_label 
 _atom_site_type_symbol 
 _atom_site_fract_x 
 _atom_site_fract_y 
 _atom_site_fract_z 
 _atom_site_U_iso_or_equiv 
 _atom_site_adp_type 
 _atom_site_occupancy 
 _atom_site_symmetry_multiplicity 
 _atom_site_calc_flag 
 _atom_site_refinement_flags 
 _atom_site_disorder_assembly 
 _atom_site_disorder_group 
Co1 Co 0.642087(16) 0.27787(2) 0.20063(2) 0.02652(8) Uani 1 1 d . . . 
N11 N 0.66013(10) 0.14729(14) 0.14177(12) 0.0219(4) Uani 1 1 d . . . 
N21 N 0.54651(10) 0.32222(14) 0.15034(12) 0.0207(4) Uani 1 1 d . . . 
C11 C 0.62858(14) 0.01055(18) 0.03447(16) 0.0245(5) Uani 1 1 d . . . 
C21 C 0.61497(12) 0.11389(17) 0.08424(15) 0.0216(5) Uani 1 1 d . . . 
C31 C 0.54777(12) 0.17117(17) 0.06434(15) 0.0237(5) Uani 1 1 d . . . 
H31A H 0.5189 0.1388 0.0237 0.028 Uiso 1 1 calc R . . 
C41 C 0.51455(12) 0.26732(18) 0.09272(15) 0.0220(5) Uani 1 1 d . . . 
C51 C 0.44018(13) 0.30106(19) 0.04733(16) 0.0275(5) Uani 1 1 d . . . 
C61 C 0.70376(15) -0.0516(2) 0.04704(19) 0.0406(7) Uani 1 1 d . . . 
H61A H 0.7065 -0.0762 0.1008 0.061 Uiso 1 1 calc R . . 
H61B H 0.7480 -0.0044 0.0360 0.061 Uiso 1 1 calc R . . 
H61C H 0.7051 -0.1141 0.0124 0.061 Uiso 1 1 calc R . . 
C71 C 0.62765(18) 0.0402(2) -0.05166(19) 0.0424(7) Uani 1 1 d . . . 
H71A H 0.6360 -0.0249 -0.0827 0.064 Uiso 1 1 calc R . . 
H71B H 0.6690 0.0924 -0.0623 0.064 Uiso 1 1 calc R . . 
H71C H 0.5774 0.0722 -0.0649 0.064 Uiso 1 1 calc R . . 
C81 C 0.56071(16) -0.0674(2) 0.0504(2) 0.0393(7) Uani 1 1 d . . . 
H81A H 0.5628 -0.0915 0.1043 0.059 Uiso 1 1 calc R . . 
H81B H 0.5648 -0.1301 0.0160 0.059 Uiso 1 1 calc R . . 
H81C H 0.5114 -0.0303 0.0409 0.059 Uiso 1 1 calc R . . 
C91 C 0.39913(14) 0.4042(2) 0.07417(17) 0.0333(6) Uani 1 1 d . . . 
H91A H 0.3828 0.3959 0.1281 0.050 Uiso 1 1 calc R . . 
H91B H 0.3535 0.4172 0.0416 0.050 Uiso 1 1 calc R . . 
H91C H 0.4348 0.4655 0.0699 0.050 Uiso 1 1 calc R . . 
C101 C 0.37980(15) 0.2096(2) 0.0517(2) 0.0424(7) Uani 1 1 d . . . 
H10A H 0.3660 0.1965 0.1058 0.064 Uiso 1 1 calc R . . 
H10B H 0.4017 0.1437 0.0292 0.064 Uiso 1 1 calc R . . 
H10C H 0.3333 0.2306 0.0227 0.064 Uiso 1 1 calc R . . 
C111 C 0.46353(16) 0.3196(2) -0.03756(17) 0.0390(7) Uani 1 1 d . . . 
H11A H 0.5013 0.3785 -0.0404 0.058 Uiso 1 1 calc R . . 
H11B H 0.4174 0.3385 -0.0678 0.058 Uiso 1 1 calc R . . 
H11C H 0.4867 0.2535 -0.0584 0.058 Uiso 1 1 calc R . . 
C12 C 0.73056(12) 0.09820(17) 0.16917(14) 0.0236(5) Uani 1 1 d . . . 
C22 C 0.80175(12) 0.13646(18) 0.14073(15) 0.0246(5) Uani 1 1 d . . . 
C32 C 0.86987(14) 0.0969(2) 0.17439(16) 0.0323(6) Uani 1 1 d . . . 
H32A H 0.9187 0.1218 0.1563 0.039 Uiso 1 1 calc R . . 
C42 C 0.86711(15) 0.0224(2) 0.23351(18) 0.0368(6) Uani 1 1 d . . . 
H42A H 0.9139 -0.0045 0.2553 0.044 Uiso 1 1 calc R . . 
C52 C 0.79659(15) -0.01329(19) 0.26094(17) 0.0328(6) Uani 1 1 d . . . 
H52A H 0.7955 -0.0644 0.3018 0.039 Uiso 1 1 calc R . . 
C62 C 0.72673(14) 0.02394(18) 0.23010(15) 0.0271(5) Uani 1 1 d . . . 
C72 C 0.80516(13) 0.21957(19) 0.07701(16) 0.0271(5) Uani 1 1 d . . . 
H72A H 0.7550 0.2158 0.0480 0.033 Uiso 1 1 calc R . . 
C82 C 0.81250(17) 0.3334(2) 0.10964(18) 0.0391(7) Uani 1 1 d . . . 
H82A H 0.7684 0.3484 0.1437 0.059 Uiso 1 1 calc R . . 
H82B H 0.8130 0.3856 0.0671 0.059 Uiso 1 1 calc R . . 
H82C H 0.8609 0.3394 0.1391 0.059 Uiso 1 1 calc R . . 
C92 C 0.87056(17) 0.2012(3) 0.01886(18) 0.0408(7) Uani 1 1 d . . . 
H92A H 0.8674 0.1275 -0.0014 0.061 Uiso 1 1 calc R . . 
H92B H 0.9207 0.2115 0.0445 0.061 Uiso 1 1 calc R . . 
H92C H 0.8655 0.2528 -0.0238 0.061 Uiso 1 1 calc R . . 
C102 C 0.64982(15) -0.01429(19) 0.26407(16) 0.0307(5) Uani 1 1 d . . . 
H10D H 0.6071 0.0129 0.2301 0.037 Uiso 1 1 calc R . . 
C112 C 0.63769(18) 0.0319(2) 0.34420(19) 0.0400(7) Uani 1 1 d . . . 
H11D H 0.5874 0.0079 0.3644 0.060 Uiso 1 1 calc R . . 
H11E H 0.6386 0.1109 0.3416 0.060 Uiso 1 1 calc R . . 
H11F H 0.6792 0.0068 0.3785 0.060 Uiso 1 1 calc R . . 
C122 C 0.6444(2) -0.1376(2) 0.2668(2) 0.0507(8) Uani 1 1 d . . . 
H12A H 0.6585 -0.1674 0.2162 0.076 Uiso 1 1 calc R . . 
H12B H 0.5911 -0.1589 0.2795 0.076 Uiso 1 1 calc R . . 
H12C H 0.6799 -0.1654 0.3062 0.076 Uiso 1 1 calc R . . 
C13 C 0.51841(11) 0.41940(16) 0.18656(14) 0.0205(5) Uani 1 1 d . . . 
C23 C 0.55066(12) 0.51907(18) 0.16490(15) 0.0237(5) Uani 1 1 d . . . 
C33 C 0.52736(11) 0.61127(16) 0.20441(19) 0.0271(5) Uani 1 1 d . . . 
H33A H 0.5477 0.6795 0.1897 0.032 Uiso 1 1 calc R . . 
C43 C 0.47477(14) 0.60518(19) 0.26513(16) 0.0302(6) Uani 1 1 d . . . 
H43A H 0.4596 0.6686 0.2920 0.036 Uiso 1 1 calc R . . 
C53 C 0.44499(13) 0.50645(19) 0.28600(15) 0.0280(5) Uani 1 1 d . . . 
H53A H 0.4092 0.5027 0.3276 0.034 Uiso 1 1 calc R . . 
C63 C 0.46570(12) 0.41203(18) 0.24804(15) 0.0248(5) Uani 1 1 d . . . 
C73 C 0.60890(13) 0.53018(19) 0.09937(17) 0.0292(5) Uani 1 1 d . . . 
H73A H 0.6192 0.4564 0.0782 0.035 Uiso 1 1 calc R . . 
C83 C 0.68612(15) 0.5757(2) 0.1298(2) 0.0415(7) Uani 1 1 d . . . 
H83A H 0.7059 0.5290 0.1711 0.062 Uiso 1 1 calc R . . 
H83B H 0.6777 0.6486 0.1502 0.062 Uiso 1 1 calc R . . 
H83C H 0.7239 0.5785 0.0876 0.062 Uiso 1 1 calc R . . 
C93 C 0.57748(17) 0.5995(2) 0.03404(18) 0.0405(7) Uani 1 1 d . . . 
H93A H 0.5295 0.5674 0.0141 0.061 Uiso 1 1 calc R . . 
H93B H 0.6160 0.6034 -0.0076 0.061 Uiso 1 1 calc R . . 
H93C H 0.5667 0.6723 0.0534 0.061 Uiso 1 1 calc R . . 
C103 C 0.43186(14) 0.30413(19) 0.27296(17) 0.0307(6) Uani 1 1 d . . . 
H10E H 0.4351 0.2536 0.2280 0.037 Uiso 1 1 calc R . . 
C113 C 0.47891(18) 0.2564(3) 0.3388(2) 0.0452(8) Uani 1 1 d . . . 
H11G H 0.5330 0.2476 0.3224 0.068 Uiso 1 1 calc R . . 
H11H H 0.4574 0.1858 0.3529 0.068 Uiso 1 1 calc R . . 
H11I H 0.4767 0.3047 0.3835 0.068 Uiso 1 1 calc R . . 
C123 C 0.34585(16) 0.3135(2) 0.2968(2) 0.0458(8) Uani 1 1 d . . . 
H12D H 0.3250 0.2414 0.3073 0.069 Uiso 1 1 calc R . . 
H12E H 0.3163 0.3471 0.2549 0.069 Uiso 1 1 calc R . . 
H12F H 0.3417 0.3579 0.3435 0.069 Uiso 1 1 calc R . . 
C14 C 0.69371(12) 0.33228(18) 0.29534(15) 0.0247(5) Uani 1 1 d . . . 
C24 C 0.75994(13) 0.28237(18) 0.32676(16) 0.0263(5) Uani 1 1 d . . . 
H24A H 0.7781 0.2172 0.3042 0.032 Uiso 1 1 calc R . . 
C34 C 0.79966(13) 0.32480(19) 0.38939(16) 0.0279(5) Uani 1 1 d . . . 
H34A H 0.8438 0.2883 0.4093 0.033 Uiso 1 1 calc R . . 
C44 C 0.77541(14) 0.4195(2) 0.42278(16) 0.0314(5) Uani 1 1 d . . . 
H44A H 0.8026 0.4486 0.4658 0.038 Uiso 1 1 calc R . . 
C54 C 0.71144(15) 0.4721(2) 0.39358(17) 0.0360(6) Uani 1 1 d . . . 
H54A H 0.6950 0.5383 0.4159 0.043 Uiso 1 1 calc R . . 
C64 C 0.67076(14) 0.4283(2) 0.33131(17) 0.0308(6) Uani 1 1 d . . . 
H64A H 0.6260 0.4649 0.3127 0.037 Uiso 1 1 calc R . . 
  
loop_ 
 _atom_site_aniso_label 
 _atom_site_aniso_U_11 
 _atom_site_aniso_U_22 
 _atom_site_aniso_U_33 
 _atom_site_aniso_U_23 
 _atom_site_aniso_U_13 
 _atom_site_aniso_U_12 
Co1 0.02416(13) 0.02315(13) 0.03226(17) -0.00954(16) -0.00932(16) 0.00678(12) 
N11 0.0195(8) 0.0191(8) 0.0271(11) -0.0038(8) 0.0002(8) 0.0006(7) 
N21 0.0182(8) 0.0180(8) 0.0258(11) -0.0043(8) -0.0011(7) 0.0012(7) 
C11 0.0244(10) 0.0183(10) 0.0307(14) -0.0065(9) 0.0007(10) -0.0021(8) 
C21 0.0188(9) 0.0195(9) 0.0265(13) -0.0023(9) 0.0006(9) -0.0020(8) 
C31 0.0205(10) 0.0219(10) 0.0287(14) -0.0061(9) -0.0021(9) -0.0019(8) 
C41 0.0153(9) 0.0236(10) 0.0272(13) -0.0023(9) 0.0003(9) 0.0010(8) 
C51 0.0180(10) 0.0324(12) 0.0322(15) -0.0089(10) -0.0042(9) 0.0056(9) 
C61 0.0342(13) 0.0360(14) 0.052(2) -0.0188(13) -0.0053(13) 0.0108(11) 
C71 0.0481(17) 0.0363(14) 0.0428(18) -0.0103(13) 0.0023(14) 0.0059(12) 
C81 0.0365(14) 0.0282(12) 0.053(2) -0.0103(13) 0.0047(13) -0.0041(11) 
C91 0.0226(11) 0.0415(14) 0.0360(16) -0.0128(12) -0.0103(10) 0.0115(10) 
C101 0.0215(11) 0.0407(15) 0.065(2) -0.0138(15) -0.0104(12) 0.0003(10) 
C111 0.0399(14) 0.0463(15) 0.0307(16) -0.0068(13) -0.0079(12) 0.0205(12) 
C12 0.0210(10) 0.0198(10) 0.0301(13) -0.0068(9) -0.0046(9) 0.0035(8) 
C22 0.0197(10) 0.0250(10) 0.0290(14) -0.0059(10) -0.0017(9) 0.0031(8) 
C32 0.0231(11) 0.0357(12) 0.0380(16) -0.0029(11) -0.0022(10) 0.0070(10) 
C42 0.0304(12) 0.0365(13) 0.0435(17) -0.0043(12) -0.0122(12) 0.0125(11) 
C52 0.0380(13) 0.0247(11) 0.0356(16) -0.0004(11) -0.0077(11) 0.0049(10) 
C62 0.0305(11) 0.0188(10) 0.0320(14) -0.0053(9) -0.0036(10) 0.0000(9) 
C72 0.0179(10) 0.0317(12) 0.0318(14) 0.0000(11) -0.0037(9) -0.0006(9) 
C82 0.0466(16) 0.0286(12) 0.0422(18) 0.0005(12) 0.0053(13) -0.0069(12) 
C92 0.0358(14) 0.0513(17) 0.0353(17) 0.0023(13) 0.0060(12) 0.0029(12) 
C102 0.0355(13) 0.0224(11) 0.0343(15) 0.0017(10) -0.0036(11) -0.0030(10) 
C112 0.0449(16) 0.0343(14) 0.0408(19) -0.0013(13) 0.0036(13) -0.0038(13) 
C122 0.060(2) 0.0253(13) 0.066(2) -0.0049(14) 0.0153(17) -0.0117(13) 
C13 0.0152(8) 0.0208(9) 0.0253(14) -0.0041(9) -0.0011(8) 0.0020(7) 
C23 0.0174(9) 0.0238(10) 0.0298(13) -0.0015(9) -0.0005(9) 0.0041(8) 
C33 0.0229(9) 0.0202(8) 0.0381(14) -0.0058(12) -0.0004(12) -0.0003(7) 
C43 0.0282(12) 0.0267(11) 0.0358(16) -0.0127(11) 0.0015(10) 0.0024(9) 
C53 0.0243(11) 0.0310(12) 0.0286(14) -0.0071(10) 0.0029(10) 0.0019(9) 
C63 0.0198(10) 0.0242(11) 0.0303(14) -0.0014(10) -0.0020(9) 0.0003(8) 
C73 0.0247(11) 0.0215(10) 0.0413(16) -0.0002(11) 0.0069(11) 0.0013(9) 
C83 0.0238(12) 0.0398(14) 0.061(2) -0.0087(14) 0.0132(13) -0.0052(11) 
C93 0.0424(15) 0.0360(14) 0.0431(18) 0.0098(13) 0.0118(13) 0.0064(12) 
C103 0.0288(11) 0.0251(11) 0.0383(16) -0.0022(10) 0.0080(11) -0.0032(9) 
C113 0.0436(16) 0.0420(15) 0.050(2) 0.0121(14) 0.0079(15) -0.0010(13) 
C123 0.0323(14) 0.0374(14) 0.068(2) 0.0015(15) 0.0126(14) -0.0077(11) 
C14 0.0214(10) 0.0254(11) 0.0275(13) -0.0031(10) -0.0011(9) -0.0016(9) 
C24 0.0255(11) 0.0235(10) 0.0299(14) -0.0028(10) -0.0038(10) 0.0005(9) 
C34 0.0226(11) 0.0295(12) 0.0315(15) 0.0013(11) -0.0038(10) -0.0036(9) 
C44 0.0295(12) 0.0384(13) 0.0262(14) -0.0052(11) -0.0026(10) -0.0070(10) 
C54 0.0328(13) 0.0412(14) 0.0340(16) -0.0172(13) -0.0016(11) 0.0056(11) 
C64 0.0242(11) 0.0341(13) 0.0342(15) -0.0080(11) -0.0029(10) 0.0069(10) 
  
_geom_special_details 
; 
 All esds (except the esd in the dihedral angle between two l.s. planes) 
 are estimated using the full covariance matrix.  The cell esds are taken 
 into account individually in the estimation of esds in distances, angles 
 and torsion angles; correlations between esds in cell parameters are only 
 used when they are defined by crystal symmetry.  An approximate (isotropic) 
 treatment of cell esds is used for estimating esds involving l.s. planes. 
; 
  
loop_ 
 _geom_bond_atom_site_label_1 
 _geom_bond_atom_site_label_2 
 _geom_bond_distance 
 _geom_bond_site_symmetry_2 
 _geom_bond_publ_flag 
Co1 N11 1.9369(19) . ? 
Co1 N21 1.9424(18) . ? 
Co1 C14 1.983(2) . ? 
N11 C21 1.330(3) . ? 
N11 C12 1.438(3) . ? 
N21 C41 1.327(3) . ? 
N21 C13 1.441(3) . ? 
C11 C61 1.523(3) . ? 
C11 C71 1.535(4) . ? 
C11 C81 1.542(3) . ? 
C11 C21 1.561(3) . ? 
C21 C31 1.401(3) . ? 
C31 C41 1.410(3) . ? 
C31 H31A 0.9500 . ? 
C41 C51 1.560(3) . ? 
C51 C91 1.533(3) . ? 
C51 C111 1.540(4) . ? 
C51 C101 1.540(4) . ? 
C61 H61A 0.9800 . ? 
C61 H61B 0.9800 . ? 
C61 H61C 0.9800 . ? 
C71 H71A 0.9800 . ? 
C71 H71B 0.9800 . ? 
C71 H71C 0.9800 . ? 
C81 H81A 0.9800 . ? 
C81 H81B 0.9800 . ? 
C81 H81C 0.9800 . ? 
C91 H91A 0.9800 . ? 
C91 H91B 0.9800 . ? 
C91 H91C 0.9800 . ? 
C101 H10A 0.9800 . ? 
C101 H10B 0.9800 . ? 
C101 H10C 0.9800 . ? 
C111 H11A 0.9800 . ? 
C111 H11B 0.9800 . ? 
C111 H11C 0.9800 . ? 
C12 C62 1.401(3) . ? 
C12 C22 1.404(3) . ? 
C22 C32 1.399(3) . ? 
C22 C72 1.510(4) . ? 
C32 C42 1.379(4) . ? 
C32 H32A 0.9500 . ? 
C42 C52 1.378(4) . ? 
C42 H42A 0.9500 . ? 
C52 C62 1.395(3) . ? 
C52 H52A 0.9500 . ? 
C62 C102 1.526(3) . ? 
C72 C82 1.524(4) . ? 
C72 C92 1.528(4) . ? 
C72 H72A 1.0000 . ? 
C82 H82A 0.9800 . ? 
C82 H82B 0.9800 . ? 
C82 H82C 0.9800 . ? 
C92 H92A 0.9800 . ? 
C92 H92B 0.9800 . ? 
C92 H92C 0.9800 . ? 
C102 C112 1.515(4) . ? 
C102 C122 1.531(3) . ? 
C102 H10D 1.0000 . ? 
C112 H11D 0.9800 . ? 
C112 H11E 0.9800 . ? 
C112 H11F 0.9800 . ? 
C122 H12A 0.9800 . ? 
C122 H12B 0.9800 . ? 
C122 H12C 0.9800 . ? 
C13 C63 1.402(3) . ? 
C13 C23 1.405(3) . ? 
C23 C33 1.390(3) . ? 
C23 C73 1.521(3) . ? 
C33 C43 1.390(4) . ? 
C33 H33A 0.9500 . ? 
C43 C53 1.375(3) . ? 
C43 H43A 0.9500 . ? 
C53 C63 1.388(3) . ? 
C53 H53A 0.9500 . ? 
C63 C103 1.521(3) . ? 
C73 C93 1.519(4) . ? 
C73 C83 1.538(4) . ? 
C73 H73A 1.0000 . ? 
C83 H83A 0.9800 . ? 
C83 H83B 0.9800 . ? 
C83 H83C 0.9800 . ? 
C93 H93A 0.9800 . ? 
C93 H93B 0.9800 . ? 
C93 H93C 0.9800 . ? 
C103 C113 1.518(4) . ? 
C103 C123 1.543(3) . ? 
C103 H10E 1.0000 . ? 
C113 H11G 0.9800 . ? 
C113 H11H 0.9800 . ? 
C113 H11I 0.9800 . ? 
C123 H12D 0.9800 . ? 
C123 H12E 0.9800 . ? 
C123 H12F 0.9800 . ? 
C14 C64 1.400(3) . ? 
C14 C24 1.408(3) . ? 
C24 C34 1.385(4) . ? 
C24 H24A 0.9500 . ? 
C34 C44 1.373(4) . ? 
C34 H34A 0.9500 . ? 
C44 C54 1.377(4) . ? 
C44 H44A 0.9500 . ? 
C54 C64 1.395(4) . ? 
C54 H54A 0.9500 . ? 
C64 H64A 0.9500 . ? 
  
loop_ 
 _geom_angle_atom_site_label_1 
 _geom_angle_atom_site_label_2 
 _geom_angle_atom_site_label_3 
 _geom_angle 
 _geom_angle_site_symmetry_1 
 _geom_angle_site_symmetry_3 
 _geom_angle_publ_flag 
N11 Co1 N21 97.87(8) . . ? 
N11 Co1 C14 130.28(9) . . ? 
N21 Co1 C14 130.89(9) . . ? 
C21 N11 C12 127.53(19) . . ? 
C21 N11 Co1 124.03(15) . . ? 
C12 N11 Co1 108.39(14) . . ? 
C41 N21 C13 127.99(18) . . ? 
C41 N21 Co1 122.94(14) . . ? 
C13 N21 Co1 109.06(14) . . ? 
C61 C11 C71 105.6(2) . . ? 
C61 C11 C81 107.6(2) . . ? 
C71 C11 C81 108.4(2) . . ? 
C61 C11 C21 117.6(2) . . ? 
C71 C11 C21 109.7(2) . . ? 
C81 C11 C21 107.6(2) . . ? 
N11 C21 C31 120.7(2) . . ? 
N11 C21 C11 125.5(2) . . ? 
C31 C21 C11 113.8(2) . . ? 
C21 C31 C41 132.7(2) . . ? 
C21 C31 H31A 113.7 . . ? 
C41 C31 H31A 113.7 . . ? 
N21 C41 C31 121.7(2) . . ? 
N21 C41 C51 125.59(19) . . ? 
C31 C41 C51 112.6(2) . . ? 
C91 C51 C111 106.6(2) . . ? 
C91 C51 C101 106.6(2) . . ? 
C111 C51 C101 109.4(2) . . ? 
C91 C51 C41 116.7(2) . . ? 
C111 C51 C41 107.77(19) . . ? 
C101 C51 C41 109.5(2) . . ? 
C11 C61 H61A 109.5 . . ? 
C11 C61 H61B 109.5 . . ? 
H61A C61 H61B 109.5 . . ? 
C11 C61 H61C 109.5 . . ? 
H61A C61 H61C 109.5 . . ? 
H61B C61 H61C 109.5 . . ? 
C11 C71 H71A 109.5 . . ? 
C11 C71 H71B 109.5 . . ? 
H71A C71 H71B 109.5 . . ? 
C11 C71 H71C 109.5 . . ? 
H71A C71 H71C 109.5 . . ? 
H71B C71 H71C 109.5 . . ? 
C11 C81 H81A 109.5 . . ? 
C11 C81 H81B 109.5 . . ? 
H81A C81 H81B 109.5 . . ? 
C11 C81 H81C 109.5 . . ? 
H81A C81 H81C 109.5 . . ? 
H81B C81 H81C 109.5 . . ? 
C51 C91 H91A 109.5 . . ? 
C51 C91 H91B 109.5 . . ? 
H91A C91 H91B 109.5 . . ? 
C51 C91 H91C 109.5 . . ? 
H91A C91 H91C 109.5 . . ? 
H91B C91 H91C 109.5 . . ? 
C51 C101 H10A 109.5 . . ? 
C51 C101 H10B 109.5 . . ? 
H10A C101 H10B 109.5 . . ? 
C51 C101 H10C 109.5 . . ? 
H10A C101 H10C 109.5 . . ? 
H10B C101 H10C 109.5 . . ? 
C51 C111 H11A 109.5 . . ? 
C51 C111 H11B 109.5 . . ? 
H11A C111 H11B 109.5 . . ? 
C51 C111 H11C 109.5 . . ? 
H11A C111 H11C 109.5 . . ? 
H11B C111 H11C 109.5 . . ? 
C62 C12 C22 121.8(2) . . ? 
C62 C12 N11 119.1(2) . . ? 
C22 C12 N11 118.6(2) . . ? 
C32 C22 C12 118.0(2) . . ? 
C32 C22 C72 120.7(2) . . ? 
C12 C22 C72 121.34(19) . . ? 
C42 C32 C22 120.9(2) . . ? 
C42 C32 H32A 119.5 . . ? 
C22 C32 H32A 119.5 . . ? 
C52 C42 C32 120.1(2) . . ? 
C52 C42 H42A 120.0 . . ? 
C32 C42 H42A 120.0 . . ? 
C42 C52 C62 121.6(3) . . ? 
C42 C52 H52A 119.2 . . ? 
C62 C52 H52A 119.2 . . ? 
C52 C62 C12 117.7(2) . . ? 
C52 C62 C102 120.0(2) . . ? 
C12 C62 C102 122.3(2) . . ? 
C22 C72 C82 111.3(2) . . ? 
C22 C72 C92 114.1(2) . . ? 
C82 C72 C92 108.7(2) . . ? 
C22 C72 H72A 107.5 . . ? 
C82 C72 H72A 107.5 . . ? 
C92 C72 H72A 107.5 . . ? 
C72 C82 H82A 109.5 . . ? 
C72 C82 H82B 109.5 . . ? 
H82A C82 H82B 109.5 . . ? 
C72 C82 H82C 109.5 . . ? 
H82A C82 H82C 109.5 . . ? 
H82B C82 H82C 109.5 . . ? 
C72 C92 H92A 109.5 . . ? 
C72 C92 H92B 109.5 . . ? 
H92A C92 H92B 109.5 . . ? 
C72 C92 H92C 109.5 . . ? 
H92A C92 H92C 109.5 . . ? 
H92B C92 H92C 109.5 . . ? 
C112 C102 C62 110.8(2) . . ? 
C112 C102 C122 109.9(2) . . ? 
C62 C102 C122 112.0(2) . . ? 
C112 C102 H10D 108.0 . . ? 
C62 C102 H10D 108.0 . . ? 
C122 C102 H10D 108.0 . . ? 
C102 C112 H11D 109.5 . . ? 
C102 C112 H11E 109.5 . . ? 
H11D C112 H11E 109.5 . . ? 
C102 C112 H11F 109.5 . . ? 
H11D C112 H11F 109.5 . . ? 
H11E C112 H11F 109.5 . . ? 
C102 C122 H12A 109.5 . . ? 
C102 C122 H12B 109.5 . . ? 
H12A C122 H12B 109.5 . . ? 
C102 C122 H12C 109.5 . . ? 
H12A C122 H12C 109.5 . . ? 
H12B C122 H12C 109.5 . . ? 
C63 C13 C23 121.1(2) . . ? 
C63 C13 N21 119.56(19) . . ? 
C23 C13 N21 119.04(19) . . ? 
C33 C23 C13 118.5(2) . . ? 
C33 C23 C73 118.9(2) . . ? 
C13 C23 C73 122.6(2) . . ? 
C43 C33 C23 121.0(2) . . ? 
C43 C33 H33A 119.5 . . ? 
C23 C33 H33A 119.5 . . ? 
C53 C43 C33 119.4(2) . . ? 
C53 C43 H43A 120.3 . . ? 
C33 C43 H43A 120.3 . . ? 
C43 C53 C63 122.0(2) . . ? 
C43 C53 H53A 119.0 . . ? 
C63 C53 H53A 119.0 . . ? 
C53 C63 C13 118.1(2) . . ? 
C53 C63 C103 120.5(2) . . ? 
C13 C63 C103 121.4(2) . . ? 
C93 C73 C23 111.8(2) . . ? 
C93 C73 C83 110.8(2) . . ? 
C23 C73 C83 110.4(2) . . ? 
C93 C73 H73A 107.9 . . ? 
C23 C73 H73A 107.9 . . ? 
C83 C73 H73A 107.9 . . ? 
C73 C83 H83A 109.5 . . ? 
C73 C83 H83B 109.5 . . ? 
H83A C83 H83B 109.5 . . ? 
C73 C83 H83C 109.5 . . ? 
H83A C83 H83C 109.5 . . ? 
H83B C83 H83C 109.5 . . ? 
C73 C93 H93A 109.5 . . ? 
C73 C93 H93B 109.5 . . ? 
H93A C93 H93B 109.5 . . ? 
C73 C93 H93C 109.5 . . ? 
H93A C93 H93C 109.5 . . ? 
H93B C93 H93C 109.5 . . ? 
C113 C103 C63 110.5(2) . . ? 
C113 C103 C123 110.0(3) . . ? 
C63 C103 C123 112.2(2) . . ? 
C113 C103 H10E 108.0 . . ? 
C63 C103 H10E 108.0 . . ? 
C123 C103 H10E 108.0 . . ? 
C103 C113 H11G 109.5 . . ? 
C103 C113 H11H 109.5 . . ? 
H11G C113 H11H 109.5 . . ? 
C103 C113 H11I 109.5 . . ? 
H11G C113 H11I 109.5 . . ? 
H11H C113 H11I 109.5 . . ? 
C103 C123 H12D 109.5 . . ? 
C103 C123 H12E 109.5 . . ? 
H12D C123 H12E 109.5 . . ? 
C103 C123 H12F 109.5 . . ? 
H12D C123 H12F 109.5 . . ? 
H12E C123 H12F 109.5 . . ? 
C64 C14 C24 115.5(2) . . ? 
C64 C14 Co1 121.98(18) . . ? 
C24 C14 Co1 122.26(18) . . ? 
C34 C24 C14 122.4(2) . . ? 
C34 C24 H24A 118.8 . . ? 
C14 C24 H24A 118.8 . . ? 
C44 C34 C24 120.2(2) . . ? 
C44 C34 H34A 119.9 . . ? 
C24 C34 H34A 119.9 . . ? 
C34 C44 C54 119.6(2) . . ? 
C34 C44 H44A 120.2 . . ? 
C54 C44 H44A 120.2 . . ? 
C44 C54 C64 120.1(2) . . ? 
C44 C54 H54A 119.9 . . ? 
C64 C54 H54A 119.9 . . ? 
C54 C64 C14 122.1(2) . . ? 
C54 C64 H64A 118.9 . . ? 
C14 C64 H64A 118.9 . . ? 
  
loop_ 
 _geom_torsion_atom_site_label_1 
 _geom_torsion_atom_site_label_2 
 _geom_torsion_atom_site_label_3 
 _geom_torsion_atom_site_label_4 
 _geom_torsion 
 _geom_torsion_site_symmetry_1 
 _geom_torsion_site_symmetry_2 
 _geom_torsion_site_symmetry_3 
 _geom_torsion_site_symmetry_4 
 _geom_torsion_publ_flag 
N21 Co1 N11 C21 2.0(2) . . . . ? 
C14 Co1 N11 C21 171.58(18) . . . . ? 
N21 Co1 N11 C12 179.76(15) . . . . ? 
C14 Co1 N11 C12 -10.7(2) . . . . ? 
N11 Co1 N21 C41 -1.1(2) . . . . ? 
C14 Co1 N21 C41 -170.52(17) . . . . ? 
N11 Co1 N21 C13 178.08(14) . . . . ? 
C14 Co1 N21 C13 8.6(2) . . . . ? 
C12 N11 C21 C31 -179.9(2) . . . . ? 
Co1 N11 C21 C31 -2.6(3) . . . . ? 
C12 N11 C21 C11 1.4(4) . . . . ? 
Co1 N11 C21 C11 178.67(17) . . . . ? 
C61 C11 C21 N11 -6.4(4) . . . . ? 
C71 C11 C21 N11 -127.1(3) . . . . ? 
C81 C11 C21 N11 115.2(3) . . . . ? 
C61 C11 C21 C31 174.8(2) . . . . ? 
C71 C11 C21 C31 54.1(3) . . . . ? 
C81 C11 C21 C31 -63.6(3) . . . . ? 
N11 C21 C31 C41 2.1(4) . . . . ? 
C11 C21 C31 C41 -179.0(3) . . . . ? 
C13 N21 C41 C31 -178.2(2) . . . . ? 
Co1 N21 C41 C31 0.8(3) . . . . ? 
C13 N21 C41 C51 4.0(4) . . . . ? 
Co1 N21 C41 C51 -177.01(18) . . . . ? 
C21 C31 C41 N21 -1.1(4) . . . . ? 
C21 C31 C41 C51 176.9(2) . . . . ? 
N21 C41 C51 C91 -2.6(4) . . . . ? 
C31 C41 C51 C91 179.5(2) . . . . ? 
N21 C41 C51 C111 117.2(3) . . . . ? 
C31 C41 C51 C111 -60.7(3) . . . . ? 
N21 C41 C51 C101 -123.8(3) . . . . ? 
C31 C41 C51 C101 58.2(3) . . . . ? 
C21 N11 C12 C62 -92.9(3) . . . . ? 
Co1 N11 C12 C62 89.5(2) . . . . ? 
C21 N11 C12 C22 95.1(3) . . . . ? 
Co1 N11 C12 C22 -82.5(2) . . . . ? 
C62 C12 C22 C32 0.9(3) . . . . ? 
N11 C12 C22 C32 172.7(2) . . . . ? 
C62 C12 C22 C72 -177.7(2) . . . . ? 
N11 C12 C22 C72 -6.0(3) . . . . ? 
C12 C22 C32 C42 0.3(4) . . . . ? 
C72 C22 C32 C42 178.9(2) . . . . ? 
C22 C32 C42 C52 -0.8(4) . . . . ? 
C32 C42 C52 C62 0.3(4) . . . . ? 
C42 C52 C62 C12 0.9(4) . . . . ? 
C42 C52 C62 C102 -177.7(2) . . . . ? 
C22 C12 C62 C52 -1.5(3) . . . . ? 
N11 C12 C62 C52 -173.2(2) . . . . ? 
C22 C12 C62 C102 177.1(2) . . . . ? 
N11 C12 C62 C102 5.4(3) . . . . ? 
C32 C22 C72 C82 -83.9(3) . . . . ? 
C12 C22 C72 C82 94.7(3) . . . . ? 
C32 C22 C72 C92 39.6(3) . . . . ? 
C12 C22 C72 C92 -141.8(2) . . . . ? 
C52 C62 C102 C112 69.5(3) . . . . ? 
C12 C62 C102 C112 -109.0(3) . . . . ? 
C52 C62 C102 C122 -53.7(3) . . . . ? 
C12 C62 C102 C122 127.8(3) . . . . ? 
C41 N21 C13 C63 87.0(3) . . . . ? 
Co1 N21 C13 C63 -92.1(2) . . . . ? 
C41 N21 C13 C23 -99.7(3) . . . . ? 
Co1 N21 C13 C23 81.2(2) . . . . ? 
C63 C13 C23 C33 -1.9(3) . . . . ? 
N21 C13 C23 C33 -175.1(2) . . . . ? 
C63 C13 C23 C73 179.1(2) . . . . ? 
N21 C13 C23 C73 5.8(3) . . . . ? 
C13 C23 C33 C43 1.5(4) . . . . ? 
C73 C23 C33 C43 -179.5(2) . . . . ? 
C23 C33 C43 C53 -0.5(4) . . . . ? 
C33 C43 C53 C63 -0.2(4) . . . . ? 
C43 C53 C63 C13 -0.2(4) . . . . ? 
C43 C53 C63 C103 179.7(2) . . . . ? 
C23 C13 C63 C53 1.3(3) . . . . ? 
N21 C13 C63 C53 174.5(2) . . . . ? 
C23 C13 C63 C103 -178.7(2) . . . . ? 
N21 C13 C63 C103 -5.5(3) . . . . ? 
C33 C23 C73 C93 -62.1(3) . . . . ? 
C13 C23 C73 C93 116.9(3) . . . . ? 
C33 C23 C73 C83 61.8(3) . . . . ? 
C13 C23 C73 C83 -119.2(2) . . . . ? 
C53 C63 C103 C113 -85.2(3) . . . . ? 
C13 C63 C103 C113 94.7(3) . . . . ? 
C53 C63 C103 C123 37.9(4) . . . . ? 
C13 C63 C103 C123 -142.1(3) . . . . ? 
N11 Co1 C14 C64 -178.04(18) . . . . ? 
N21 Co1 C14 C64 -11.8(3) . . . . ? 
N11 Co1 C14 C24 7.8(3) . . . . ? 
N21 Co1 C14 C24 174.00(17) . . . . ? 
C64 C14 C24 C34 0.4(4) . . . . ? 
Co1 C14 C24 C34 174.94(19) . . . . ? 
C14 C24 C34 C44 -0.7(4) . . . . ? 
C24 C34 C44 C54 -0.1(4) . . . . ? 
C34 C44 C54 C64 1.1(4) . . . . ? 
C44 C54 C64 C14 -1.5(4) . . . . ? 
C24 C14 C64 C54 0.7(4) . . . . ? 
Co1 C14 C64 C54 -173.9(2) . . . . ? 
  
_diffrn_measured_fraction_theta_max    0.997 
_diffrn_reflns_theta_full              30.50 
_diffrn_measured_fraction_theta_full   0.997 
_refine_diff_density_max    0.528 
_refine_diff_density_min   -0.424 
_refine_diff_density_rms    0.055 
#===END
_publ_section_references
;
Altomare, A., Burla, M. C., Camalli, M., Cascarano, G. L., Giacovazzo, C.,
Guagliardi, A., Moliterni, A. G. G., Polidori, G., Spagna, R (1999).
SIR97, J. Appl. Cryst. 32, 115-119.

Bruker (2009). SAINT V7.68A, Bruker AXS, Inc., Madison, WI, USA.

Bruker (2010). APEX2 V2010.7-0, Bruker AXS, Inc., Madison, WI, USA.

Sheldrick, G. M. (2008). SADABS V2008/1, University of G\"ottingen, Germany.

Sheldrick, G. M. (2008). Acta Cryst. A64, 112-122.

Spek, A. L. (2003). PLATON V300106, J. Appl. Cryst. 36, 7-13.
;
 
data_[L(tBu)CoF]2
  
_vrf_PLAT601_[L(tBu)CoF]2 
; 
PROBLEM: _A Structure Contains Solvent Accessible VOIDS of .. 218.00 A**3 
RESPONSE: Highly disordered solvent (toluene?) was observed in channels 
parallel to the c-axis. Reflection contributions from this solvent were 
removed with program PLATON, function SQUEEZE (Spek, 2003), which 
determined there to be 204 electrons in 1062 \%A^3^ removed per unit cell. 
Since the identity and exact amount of solvent were unknown, the solvent 
was not included in the atom list or molecular formula. Thus all fields 
that derive from the molecular formula (e.g., F(000), density, formula 
weight, etc.) are known to be incorrect. 
; 
  
_vrf_PLAT301_[L(tBu)CoF]2 
; 
PROBLEM: _G Note: Main Residue  Disorder ................... 25.00 Perc. 
RESPONSE: The bridging fluoride ligands are modeled as disordered over a 
crystallographic two-fold axis. Additionally, one of the ligand arms is 
modeled as disordered over two positions (50:50). 
; 
  
_vrf_PLAT860_[L(tBu)CoF]2 
; 
PROBLEM: _G Note: Number of Least-Squares Restraints ....... 43 
RESPONSE: Corresponding bond lengths and angles in both orientations of the 
ligand arm disorder were restrained to be similar. Anisotropic displacement 
parameters for pairs of related atoms from each part of the disorder were 
constrained to be equivalent. 
; 
  
_audit_creation_method            SHELXL-97 
_chemical_name_systematic 
; 
 ? 
; 
_chemical_name_common             [L(tBu)CoF]2 
_chemical_melting_point           ? 
_chemical_formula_moiety          'C70 H106 Co2 F2 N4' 
_chemical_formula_sum             'C70 H106 Co2 F2 N4' 
_chemical_formula_weight          1159.45 
  
loop_ 
 _atom_type_symbol 
 _atom_type_description 
 _atom_type_scat_dispersion_real 
 _atom_type_scat_dispersion_imag 
 _atom_type_scat_source 
 'C'  'C'   0.0033   0.0016 
 'International Tables Vol C Tables 4.2.6.8 and 6.1.1.4' 
 'H'  'H'   0.0000   0.0000 
 'International Tables Vol C Tables 4.2.6.8 and 6.1.1.4' 
 'N'  'N'   0.0061   0.0033 
 'International Tables Vol C Tables 4.2.6.8 and 6.1.1.4' 
 'F'  'F'   0.0171   0.0103 
 'International Tables Vol C Tables 4.2.6.8 and 6.1.1.4' 
 'Co'  'Co'   0.3494   0.9721 
 'International Tables Vol C Tables 4.2.6.8 and 6.1.1.4' 
  
_symmetry_cell_setting            monoclinic 
_symmetry_space_group_name_H-M    'C 1 2/c 1' 
  
loop_ 
 _symmetry_equiv_pos_as_xyz 
 'x, y, z' 
 '-x, y, -z+1/2' 
 'x+1/2, y+1/2, z' 
 '-x+1/2, y+1/2, -z+1/2' 
 '-x, -y, -z' 
 'x, -y, z-1/2' 
 '-x+1/2, -y+1/2, -z' 
 'x+1/2, -y+1/2, z-1/2' 
  
_cell_length_a                    24.218(2) 
_cell_length_b                    12.1814(12) 
_cell_length_c                    26.222(3) 
_cell_angle_alpha                 90.00 
_cell_angle_beta                  111.373(2) 
_cell_angle_gamma                 90.00 
_cell_volume                      7203.9(13) 
_cell_formula_units_Z             4 
_cell_measurement_temperature     223(2) 
_cell_measurement_reflns_used     4052 
_cell_measurement_theta_min       2.20 
_cell_measurement_theta_max       21.91 
  
_exptl_crystal_description        block 
_exptl_crystal_colour             red 
_exptl_crystal_size_max           0.24 
_exptl_crystal_size_mid           0.20 
_exptl_crystal_size_min           0.12 
_exptl_crystal_density_meas       ? 
_exptl_crystal_density_diffrn     1.069 
_exptl_crystal_density_method     'not measured' 
_exptl_crystal_F_000              2504 
_exptl_absorpt_coefficient_mu     0.504 
_exptl_absorpt_correction_type    multi-scan 
_exptl_absorpt_correction_T_min   0.8887 
_exptl_absorpt_correction_T_max   0.9420 
_exptl_absorpt_process_details    'SADABS (Sheldrick, 2008)' 
  
_exptl_special_details 
; 
 ? 
; 
  
_diffrn_ambient_temperature       223(2) 
_diffrn_radiation_wavelength      0.71073 
_diffrn_radiation_type            MoK\a 
_diffrn_radiation_source          'fine-focus sealed tube' 
_diffrn_radiation_monochromator   graphite 
_diffrn_measurement_device_type   'Bruker SMART APEX II CCD Platform' 
_diffrn_measurement_method        'area detector, \w scans per \f' 
_diffrn_detector_area_resol_mean  ? 
_diffrn_standards_number          0 
_diffrn_standards_interval_count  ? 
_diffrn_standards_interval_time   ? 
_diffrn_standards_decay_%         ? 
_diffrn_reflns_number             32792 
_diffrn_reflns_av_R_equivalents   0.0739 
_diffrn_reflns_av_sigmaI/netI     0.0591 
_diffrn_reflns_limit_h_min        -28 
_diffrn_reflns_limit_h_max        28 
_diffrn_reflns_limit_k_min        -14 
_diffrn_reflns_limit_k_max        14 
_diffrn_reflns_limit_l_min        -31 
_diffrn_reflns_limit_l_max        31 
_diffrn_reflns_theta_min          1.67 
_diffrn_reflns_theta_max          25.03 
_reflns_number_total              6360 
_reflns_number_gt                 3775 
_reflns_threshold_expression      >2sigma(I) 
  
_computing_data_collection        'APEX2 (Bruker, 2010)' 
_computing_cell_refinement        'SAINT (Bruker, 2009)' 
_computing_data_reduction         'SAINT (Bruker, 2009)' 
_computing_structure_solution     'SIR97 (Altomare et al., 1999)' 
_computing_structure_refinement   'SHELXL-97 (Sheldrick, 2008)' 
_computing_molecular_graphics     'SHELXTL (Sheldrick, 2008)' 
_computing_publication_material   'SHELXTL (Sheldrick, 2008)' 
  
_refine_special_details 
; 
 Refinement of F^2^ against ALL reflections.  The weighted R-factor wR and 
 goodness of fit S are based on F^2^, conventional R-factors R are based 
 on F, with F set to zero for negative F^2^. The threshold expression of 
 F^2^ > 2sigma(F^2^) is used only for calculating R-factors(gt) etc. and is 
 not relevant to the choice of reflections for refinement.  R-factors based 
 on F^2^ are statistically about twice as large as those based on F, and R- 
 factors based on ALL data will be even larger. 
  
 At 100 K the data were triclinic and pseudo-merohedrally twinned. The data 
 for this report were collected at 223 K. 
  
 Highly disordered solvent (toluene?) was observed in channels parallel to 
 the c-axis. Reflection contributions from this solvent were removed with 
 program PLATON, function SQUEEZE (Spek, 2003), which determined there to 
 be 204 electrons in 1062 \%A^3^ removed per unit cell. Since the identity 
 and exact amount of solvent were unknown, the solvent was not included in 
 the atom list or molecular formula. Thus all fields that derive from the 
 molecular formula (e.g., F(000), density, formula weight, etc.) are known 
 to be incorrect. 
  
 The bridging fluoride ligands are modeled as disordered over a 
 crystallographic two-fold axis. Additionally, one of the ligand arms is 
 modeled as disordered over two positions (50:50). Corresponding bond 
 lengths and angles in both orientations of the ligand arm disorder were 
 restrained to be similar. Anisotropic displacement parameters for pairs 
 of related atoms from each part of the disorder were constrained to be 
 equivalent. 
; 
  
_refine_ls_structure_factor_coef  Fsqd 
_refine_ls_matrix_type            full 
_refine_ls_weighting_scheme       calc 
_refine_ls_weighting_details 
 'calc w=1/[\s^2^(Fo^2^)+(0.0728P)^2^+0.0000P] where P=(Fo^2^+2Fc^2^)/3' 
_atom_sites_solution_primary      direct 
_atom_sites_solution_secondary    difmap 
_atom_sites_solution_hydrogens    geom 
_refine_ls_hydrogen_treatment     constr 
_refine_ls_extinction_method      none 
_refine_ls_extinction_coef        ? 
_refine_ls_number_reflns          6360 
_refine_ls_number_parameters      415 
_refine_ls_number_restraints      43 
_refine_ls_R_factor_all           0.0973 
_refine_ls_R_factor_gt            0.0541 
_refine_ls_wR_factor_ref          0.1494 
_refine_ls_wR_factor_gt           0.1334 
_refine_ls_goodness_of_fit_ref    1.024 
_refine_ls_restrained_S_all       1.026 
_refine_ls_shift/su_max           0.001 
_refine_ls_shift/su_mean          0.000 
  
loop_ 
 _atom_site_label 
 _atom_site_type_symbol 
 _atom_site_fract_x 
 _atom_site_fract_y 
 _atom_site_fract_z 
 _atom_site_U_iso_or_equiv 
 _atom_site_adp_type 
 _atom_site_occupancy 
 _atom_site_symmetry_multiplicity 
 _atom_site_calc_flag 
 _atom_site_refinement_flags 
 _atom_site_disorder_assembly 
 _atom_site_disorder_group 
Co1 Co 0.934510(17) 0.04582(4) 0.21258(2) 0.05801(19) Uani 1 1 d . . . 
F1 F 0.9919(2) 0.0964(7) 0.2844(3) 0.123(3) Uani 0.50 1 d P . 1 
F1' F 1.0165(2) 0.0138(6) 0.2147(3) 0.095(2) Uani 0.50 1 d P . 5 
N11 N 0.86527(11) 0.1288(2) 0.21446(13) 0.0673(8) Uani 1 1 d D . . 
N21 N 0.89330(10) -0.0478(2) 0.14981(11) 0.0560(7) Uani 1 1 d . . . 
C11 C 0.75168(15) 0.1519(3) 0.1838(2) 0.0901(14) Uani 1 1 d . . . 
C21 C 0.81077(14) 0.0916(3) 0.18902(16) 0.0659(10) Uani 1 1 d . . . 
C31 C 0.80211(14) -0.0101(3) 0.16219(15) 0.0670(10) Uani 1 1 d . . . 
H31A H 0.7654 -0.0423 0.1578 0.080 Uiso 1 1 calc R . . 
C41 C 0.83591(14) -0.0737(3) 0.14064(13) 0.0583(9) Uani 1 1 d . . . 
C51 C 0.80472(14) -0.1824(3) 0.11178(15) 0.0654(10) Uani 1 1 d . . . 
C61 C 0.75479(16) 0.2610(3) 0.2128(2) 0.1054(17) Uani 1 1 d . . . 
H61A H 0.7758 0.3140 0.1990 0.158 Uiso 1 1 calc R . . 
H61B H 0.7756 0.2513 0.2518 0.158 Uiso 1 1 calc R . . 
H61C H 0.7150 0.2873 0.2060 0.158 Uiso 1 1 calc R . . 
C71 C 0.7129(2) 0.0744(4) 0.2027(3) 0.150(3) Uani 1 1 d . . . 
H71A H 0.7044 0.0086 0.1804 0.225 Uiso 1 1 calc R . . 
H71B H 0.6761 0.1109 0.1990 0.225 Uiso 1 1 calc R . . 
H71C H 0.7338 0.0546 0.2408 0.225 Uiso 1 1 calc R . . 
C81 C 0.7206(2) 0.1723(5) 0.1215(3) 0.152(3) Uani 1 1 d . . . 
H81A H 0.7462 0.2160 0.1084 0.227 Uiso 1 1 calc R . . 
H81B H 0.6836 0.2111 0.1147 0.227 Uiso 1 1 calc R . . 
H81C H 0.7125 0.1024 0.1024 0.227 Uiso 1 1 calc R . . 
C91 C 0.81599(18) -0.2638(3) 0.15877(17) 0.0833(12) Uani 1 1 d . . . 
H91A H 0.7975 -0.3335 0.1444 0.125 Uiso 1 1 calc R . . 
H91B H 0.7993 -0.2353 0.1846 0.125 Uiso 1 1 calc R . . 
H91C H 0.8583 -0.2743 0.1772 0.125 Uiso 1 1 calc R . . 
C101 C 0.73751(16) -0.1683(4) 0.08165(18) 0.0945(14) Uani 1 1 d . . . 
H10A H 0.7207 -0.2364 0.0635 0.142 Uiso 1 1 calc R . . 
H10B H 0.7302 -0.1102 0.0547 0.142 Uiso 1 1 calc R . . 
H10C H 0.7192 -0.1492 0.1078 0.142 Uiso 1 1 calc R . . 
C111 C 0.82665(18) -0.2349(4) 0.06992(17) 0.0916(13) Uani 1 1 d . . . 
H11A H 0.8047 -0.3020 0.0562 0.137 Uiso 1 1 calc R . . 
H11B H 0.8685 -0.2518 0.0871 0.137 Uiso 1 1 calc R . . 
H11C H 0.8207 -0.1844 0.0398 0.137 Uiso 1 1 calc R . . 
C12 C 0.880(2) 0.2379(12) 0.2392(8) 0.069(4) Uani 0.50 1 d PD . 1 
C22 C 0.8875(11) 0.3301(13) 0.2096(5) 0.073(4) Uani 0.50 1 d PD . 1 
C32 C 0.9011(8) 0.4277(12) 0.2396(6) 0.096(5) Uani 0.50 1 d PD . 1 
H32 H 0.9066 0.4929 0.2229 0.115 Uiso 0.50 1 calc PR . 1 
C42 C 0.9064(9) 0.4281(15) 0.2943(7) 0.109(6) Uani 0.50 1 d PD . 1 
H42 H 0.9137 0.4956 0.3130 0.131 Uiso 0.50 1 calc PR . 1 
C52 C 0.9017(12) 0.3380(12) 0.3220(7) 0.114(6) Uani 0.50 1 d PD . 1 
H52 H 0.9057 0.3429 0.3590 0.137 Uiso 0.50 1 calc PR . 1 
C62 C 0.8907(14) 0.2363(13) 0.2948(8) 0.081(4) Uani 0.50 1 d PD . 1 
C72 C 0.8825(8) 0.3273(16) 0.1507(5) 0.081(4) Uani 0.50 1 d PDU . 1 
H72 H 0.8658 0.2552 0.1352 0.097 Uiso 0.50 1 calc PR . 1 
C82 C 0.9448(8) 0.336(2) 0.1490(8) 0.109(6) Uani 0.50 1 d PDU . 1 
H82A H 0.9563 0.4125 0.1509 0.163 Uiso 0.50 1 calc PR . 1 
H82B H 0.9450 0.3042 0.1152 0.163 Uiso 0.50 1 calc PR . 1 
H82C H 0.9726 0.2965 0.1799 0.163 Uiso 0.50 1 calc PR . 1 
C92 C 0.8416(11) 0.417(2) 0.1153(7) 0.125(7) Uani 0.50 1 d PD . 1 
H92A H 0.8028 0.4116 0.1178 0.188 Uiso 0.50 1 calc PR . 1 
H92B H 0.8380 0.4082 0.0774 0.188 Uiso 0.50 1 calc PR . 1 
H92C H 0.8584 0.4890 0.1283 0.188 Uiso 0.50 1 calc PR . 1 
C102 C 0.8885(10) 0.1378(14) 0.3288(9) 0.087(4) Uani 0.50 1 d PD . 1 
H102 H 0.8797 0.0735 0.3040 0.104 Uiso 0.50 1 calc PR . 1 
C112 C 0.9494(8) 0.115(3) 0.3746(11) 0.119(7) Uani 0.50 1 d PD . 1 
H11D H 0.9510 0.0399 0.3867 0.178 Uiso 0.50 1 calc PR . 1 
H11E H 0.9547 0.1644 0.4052 0.178 Uiso 0.50 1 calc PR . 1 
H11F H 0.9808 0.1280 0.3605 0.178 Uiso 0.50 1 calc PR . 1 
C122 C 0.8427(7) 0.1364(16) 0.3569(9) 0.136(4) Uani 0.50 1 d PD . 1 
H12A H 0.8526 0.1927 0.3850 0.204 Uiso 0.50 1 calc PR . 1 
H12B H 0.8431 0.0651 0.3735 0.204 Uiso 0.50 1 calc PR . 1 
H12C H 0.8036 0.1506 0.3300 0.204 Uiso 0.50 1 calc PR . 1 
C12' C 0.878(2) 0.2188(12) 0.2544(9) 0.069(4) Uani 0.50 1 d PD . 5 
C22' C 0.8884(11) 0.3220(13) 0.2351(6) 0.073(4) Uani 0.50 1 d PD . 5 
C32' C 0.9009(8) 0.4129(13) 0.2697(6) 0.096(5) Uani 0.50 1 d PD . 5 
H32' H 0.9057 0.4828 0.2567 0.115 Uiso 0.50 1 calc PR . 5 
C42' C 0.9062(9) 0.3981(13) 0.3240(7) 0.109(6) Uani 0.50 1 d PD . 5 
H42' H 0.9134 0.4592 0.3474 0.131 Uiso 0.50 1 calc PR . 5 
C52' C 0.9012(13) 0.2980(12) 0.3435(7) 0.114(6) Uani 0.50 1 d PD . 5 
H52' H 0.9089 0.2889 0.3811 0.137 Uiso 0.50 1 calc PR . 5 
C62' C 0.8846(14) 0.2075(13) 0.3086(8) 0.081(4) Uani 0.50 1 d PD . 5 
C72' C 0.8857(8) 0.3359(16) 0.1773(5) 0.081(4) Uani 0.50 1 d PD . 5 
H72' H 0.8691 0.2679 0.1568 0.097 Uiso 0.50 1 calc PR . 5 
C82' C 0.9482(8) 0.353(2) 0.1767(8) 0.109(6) Uani 0.50 1 d PD . 5 
H82D H 0.9689 0.4077 0.2038 0.163 Uiso 0.50 1 calc PR . 5 
H82E H 0.9454 0.3782 0.1407 0.163 Uiso 0.50 1 calc PR . 5 
H82F H 0.9699 0.2844 0.1851 0.163 Uiso 0.50 1 calc PR . 5 
C92' C 0.8462(10) 0.433(2) 0.1478(6) 0.125(7) Uani 0.50 1 d PD . 5 
H92D H 0.8065 0.4227 0.1478 0.188 Uiso 0.50 1 calc PR . 5 
H92E H 0.8446 0.4367 0.1103 0.188 Uiso 0.50 1 calc PR . 5 
H92F H 0.8626 0.5008 0.1666 0.188 Uiso 0.50 1 calc PR . 5 
C10" C 0.8804(10) 0.0963(13) 0.3317(9) 0.087(4) Uani 0.50 1 d PDU . 5 
H10" H 0.8779 0.0400 0.3037 0.104 Uiso 0.50 1 calc PR . 5 
C11" C 0.9350(8) 0.072(3) 0.3832(11) 0.119(7) Uani 0.50 1 d PD . 5 
H11J H 0.9707 0.0843 0.3755 0.178 Uiso 0.50 1 calc PR . 5 
H11K H 0.9339 -0.0041 0.3940 0.178 Uiso 0.50 1 calc PR . 5 
H11L H 0.9350 0.1198 0.4127 0.178 Uiso 0.50 1 calc PR . 5 
C12" C 0.8244(7) 0.0895(16) 0.3455(10) 0.136(4) Uani 0.50 1 d PDU . 5 
H12G H 0.8310 0.1273 0.3798 0.204 Uiso 0.50 1 calc PR . 5 
H12H H 0.8150 0.0131 0.3489 0.204 Uiso 0.50 1 calc PR . 5 
H12I H 0.7917 0.1237 0.3165 0.204 Uiso 0.50 1 calc PR . 5 
C13 C 0.91969(14) -0.0737(3) 0.11030(14) 0.0616(9) Uani 1 1 d . . . 
C23 C 0.96575(15) -0.1511(3) 0.12123(14) 0.0655(10) Uani 1 1 d . . . 
C33 C 0.98808(18) -0.1736(4) 0.08067(18) 0.0968(15) Uani 1 1 d . . . 
H33A H 1.0190 -0.2249 0.0878 0.116 Uiso 1 1 calc R . . 
C43 C 0.9666(2) -0.1236(6) 0.0305(2) 0.124(2) Uani 1 1 d . . . 
H43A H 0.9807 -0.1433 0.0028 0.149 Uiso 1 1 calc R . . 
C53 C 0.9237(2) -0.0435(5) 0.02155(19) 0.121(2) Uani 1 1 d . . . 
H53A H 0.9101 -0.0061 -0.0121 0.146 Uiso 1 1 calc R . . 
C63 C 0.90029(17) -0.0170(4) 0.06040(17) 0.0848(13) Uani 1 1 d . . . 
C73 C 0.99208(16) -0.2117(4) 0.17435(16) 0.0762(11) Uani 1 1 d . . . 
H73A H 0.9736 -0.1829 0.1997 0.091 Uiso 1 1 calc R . . 
C83 C 1.05960(18) -0.1920(5) 0.20081(19) 0.1192(19) Uani 1 1 d . . . 
H83A H 1.0672 -0.1142 0.2074 0.179 Uiso 1 1 calc R . . 
H83B H 1.0787 -0.2182 0.1764 0.179 Uiso 1 1 calc R . . 
H83C H 1.0753 -0.2315 0.2353 0.179 Uiso 1 1 calc R . . 
C93 C 0.9793(2) -0.3359(4) 0.1674(2) 0.1181(18) Uani 1 1 d . . . 
H93A H 0.9368 -0.3480 0.1538 0.177 Uiso 1 1 calc R . . 
H93B H 0.9975 -0.3721 0.2026 0.177 Uiso 1 1 calc R . . 
H93C H 0.9956 -0.3656 0.1416 0.177 Uiso 1 1 calc R . . 
C103 C 0.8556(2) 0.0756(4) 0.0482(2) 0.1084(16) Uani 1 1 d U . . 
H10D H 0.8466 0.0886 0.0816 0.130 Uiso 1 1 calc R . . 
C113 C 0.8813(3) 0.1820(5) 0.0350(3) 0.165(3) Uani 1 1 d U . . 
H11G H 0.9197 0.1962 0.0632 0.248 Uiso 1 1 calc R . . 
H11H H 0.8548 0.2425 0.0335 0.248 Uiso 1 1 calc R . . 
H11I H 0.8858 0.1748 -0.0002 0.248 Uiso 1 1 calc R . . 
C123 C 0.7976(2) 0.0518(5) 0.0017(3) 0.164(3) Uani 1 1 d . . . 
H12D H 0.7786 -0.0112 0.0110 0.246 Uiso 1 1 calc R . . 
H12E H 0.8053 0.0362 -0.0314 0.246 Uiso 1 1 calc R . . 
H12F H 0.7717 0.1151 -0.0043 0.246 Uiso 1 1 calc R . . 
  
loop_ 
 _atom_site_aniso_label 
 _atom_site_aniso_U_11 
 _atom_site_aniso_U_22 
 _atom_site_aniso_U_33 
 _atom_site_aniso_U_23 
 _atom_site_aniso_U_13 
 _atom_site_aniso_U_12 
Co1 0.0362(2) 0.0461(3) 0.0873(4) -0.0010(3) 0.0172(2) -0.0016(2) 
F1 0.040(3) 0.178(7) 0.129(5) -0.077(5) 0.004(3) 0.018(4) 
F1' 0.037(2) 0.153(6) 0.097(4) -0.035(4) 0.025(2) -0.002(3) 
N11 0.0374(15) 0.0509(18) 0.107(2) -0.0073(17) 0.0186(14) -0.0010(13) 
N21 0.0406(14) 0.0580(17) 0.0702(17) 0.0050(15) 0.0211(12) -0.0050(13) 
C11 0.0330(18) 0.076(3) 0.156(4) -0.021(3) 0.028(2) 0.0005(18) 
C21 0.0408(19) 0.053(2) 0.102(3) -0.002(2) 0.0247(18) -0.0057(16) 
C31 0.0406(18) 0.066(2) 0.098(3) -0.011(2) 0.0288(18) -0.0155(16) 
C41 0.0481(19) 0.057(2) 0.068(2) 0.0044(17) 0.0187(16) -0.0093(15) 
C51 0.053(2) 0.069(3) 0.070(2) -0.008(2) 0.0183(17) -0.0138(17) 
C61 0.040(2) 0.074(3) 0.195(5) -0.012(3) 0.034(3) 0.0133(19) 
C71 0.094(4) 0.100(4) 0.306(8) -0.042(5) 0.133(5) -0.025(3) 
C81 0.067(3) 0.131(5) 0.205(6) -0.024(4) -0.012(4) 0.037(3) 
C91 0.088(3) 0.064(3) 0.092(3) -0.008(2) 0.026(2) -0.025(2) 
C101 0.055(2) 0.100(3) 0.108(3) -0.024(3) 0.006(2) -0.019(2) 
C111 0.078(3) 0.099(3) 0.095(3) -0.036(3) 0.029(2) -0.026(2) 
C12 0.032(3) 0.041(5) 0.128(10) -0.009(7) 0.023(11) 0.003(7) 
C22 0.032(2) 0.049(4) 0.130(13) -0.007(8) 0.020(11) 0.000(3) 
C32 0.044(3) 0.057(5) 0.192(16) -0.013(9) 0.050(10) 0.001(3) 
C42 0.055(3) 0.082(9) 0.190(17) -0.050(11) 0.044(11) 0.007(6) 
C52 0.060(3) 0.077(11) 0.183(14) -0.043(10) 0.019(11) 0.033(10) 
C62 0.042(6) 0.063(8) 0.136(10) -0.022(7) 0.032(7) 0.008(7) 
C72 0.052(3) 0.056(4) 0.123(12) 0.005(9) 0.017(9) -0.005(3) 
C82 0.057(3) 0.089(9) 0.178(19) 0.013(13) 0.040(9) -0.005(4) 
C92 0.076(5) 0.087(7) 0.189(18) 0.053(14) 0.019(12) 0.010(5) 
C102 0.072(6) 0.081(11) 0.107(4) -0.027(7) 0.033(4) 0.020(7) 
C112 0.098(9) 0.17(2) 0.090(8) -0.007(9) 0.036(6) 0.039(10) 
C122 0.084(9) 0.137(13) 0.186(9) -0.030(9) 0.049(8) 0.002(7) 
C12' 0.032(3) 0.041(5) 0.128(10) -0.009(7) 0.023(11) 0.003(7) 
C22' 0.032(2) 0.049(4) 0.130(13) -0.007(8) 0.020(11) 0.000(3) 
C32' 0.044(3) 0.057(5) 0.192(16) -0.013(9) 0.050(10) 0.001(3) 
C42' 0.055(3) 0.082(9) 0.190(17) -0.050(11) 0.044(11) 0.007(6) 
C52' 0.060(3) 0.077(11) 0.183(14) -0.043(10) 0.019(11) 0.033(10) 
C62' 0.042(6) 0.063(8) 0.136(10) -0.022(7) 0.032(7) 0.008(7) 
C72' 0.052(3) 0.056(4) 0.123(12) 0.005(9) 0.017(9) -0.005(3) 
C82' 0.057(3) 0.089(9) 0.178(19) 0.013(13) 0.040(9) -0.005(4) 
C92' 0.076(5) 0.087(7) 0.189(18) 0.053(14) 0.019(12) 0.010(5) 
C10" 0.072(6) 0.081(11) 0.107(4) -0.027(7) 0.033(4) 0.020(7) 
C11" 0.098(9) 0.17(2) 0.090(8) -0.007(9) 0.036(6) 0.039(10) 
C12" 0.084(9) 0.137(13) 0.186(9) -0.030(9) 0.049(8) 0.002(7) 
C13 0.0509(19) 0.072(3) 0.063(2) 0.0086(18) 0.0213(16) -0.0054(17) 
C23 0.061(2) 0.081(3) 0.061(2) 0.007(2) 0.0293(18) -0.0018(19) 
C33 0.078(3) 0.143(4) 0.086(3) 0.018(3) 0.050(2) 0.019(3) 
C43 0.104(4) 0.209(6) 0.076(3) 0.026(4) 0.054(3) 0.019(4) 
C53 0.095(4) 0.194(6) 0.081(3) 0.058(4) 0.039(3) 0.019(4) 
C63 0.065(2) 0.111(4) 0.076(3) 0.032(3) 0.023(2) 0.004(2) 
C73 0.061(2) 0.096(3) 0.080(3) 0.019(2) 0.036(2) 0.016(2) 
C83 0.061(3) 0.202(6) 0.093(3) 0.034(4) 0.027(2) 0.015(3) 
C93 0.113(4) 0.095(4) 0.162(5) 0.040(3) 0.070(4) 0.033(3) 
C103 0.087(3) 0.124(4) 0.110(3) 0.058(3) 0.030(3) 0.015(3) 
C113 0.117(4) 0.139(5) 0.209(6) 0.086(5) 0.021(4) -0.001(4) 
C123 0.086(4) 0.173(7) 0.190(6) 0.076(5) 0.001(4) 0.010(4) 
  
_geom_special_details 
; 
 All esds (except the esd in the dihedral angle between two l.s. planes) 
 are estimated using the full covariance matrix.  The cell esds are taken 
 into account individually in the estimation of esds in distances, angles 
 and torsion angles; correlations between esds in cell parameters are only 
 used when they are defined by crystal symmetry.  An approximate (isotropic) 
 treatment of cell esds is used for estimating esds involving l.s. planes. 
; 
  
loop_ 
 _geom_bond_atom_site_label_1 
 _geom_bond_atom_site_label_2 
 _geom_bond_distance 
 _geom_bond_site_symmetry_2 
 _geom_bond_publ_flag 
Co1 F1 1.860(6) 2_755 ? 
Co1 F1' 1.883(6) 2_755 ? 
Co1 N21 1.951(3) . ? 
Co1 N11 1.974(3) . ? 
Co1 F1 1.988(6) . ? 
Co1 F1' 2.004(5) . ? 
F1 Co1 1.860(6) 2_755 ? 
F1' Co1 1.883(6) 2_755 ? 
N11 C21 1.323(4) . ? 
N11 C12 1.465(8) . ? 
N11 C12' 1.468(8) . ? 
N21 C41 1.359(4) . ? 
N21 C13 1.437(4) . ? 
C11 C61 1.519(6) . ? 
C11 C71 1.536(6) . ? 
C11 C81 1.549(7) . ? 
C11 C21 1.570(5) . ? 
C21 C31 1.402(5) . ? 
C31 C41 1.388(5) . ? 
C31 H31A 0.9400 . ? 
C41 C51 1.575(5) . ? 
C51 C111 1.523(5) . ? 
C51 C91 1.526(5) . ? 
C51 C101 1.538(5) . ? 
C61 H61A 0.9700 . ? 
C61 H61B 0.9700 . ? 
C61 H61C 0.9700 . ? 
C71 H71A 0.9700 . ? 
C71 H71B 0.9700 . ? 
C71 H71C 0.9700 . ? 
C81 H81A 0.9700 . ? 
C81 H81B 0.9700 . ? 
C81 H81C 0.9700 . ? 
C91 H91A 0.9700 . ? 
C91 H91B 0.9700 . ? 
C91 H91C 0.9700 . ? 
C101 H10A 0.9700 . ? 
C101 H10B 0.9700 . ? 
C101 H10C 0.9700 . ? 
C111 H11A 0.9700 . ? 
C111 H11B 0.9700 . ? 
C111 H11C 0.9700 . ? 
C12 C62 1.385(12) . ? 
C12 C22 1.413(12) . ? 
C22 C32 1.397(12) . ? 
C22 C72 1.505(8) . ? 
C32 C42 1.394(16) . ? 
C32 H32 0.9400 . ? 
C42 C52 1.343(17) . ? 
C42 H42 0.9400 . ? 
C52 C62 1.406(13) . ? 
C52 H52 0.9400 . ? 
C62 C102 1.508(9) . ? 
C72 C82 1.529(12) . ? 
C72 C92 1.541(12) . ? 
C72 H72 0.9900 . ? 
C82 H82A 0.9700 . ? 
C82 H82B 0.9700 . ? 
C82 H82C 0.9700 . ? 
C92 H92A 0.9700 . ? 
C92 H92B 0.9700 . ? 
C92 H92C 0.9700 . ? 
C102 C122 1.539(13) . ? 
C102 C112 1.549(12) . ? 
C102 H102 0.9900 . ? 
C112 H11D 0.9700 . ? 
C112 H11E 0.9700 . ? 
C112 H11F 0.9700 . ? 
C122 H12A 0.9700 . ? 
C122 H12B 0.9700 . ? 
C122 H12C 0.9700 . ? 
C12' C62' 1.378(12) . ? 
C12' C22' 1.411(12) . ? 
C22' C32' 1.393(13) . ? 
C22' C72' 1.501(8) . ? 
C32' C42' 1.394(17) . ? 
C32' H32' 0.9400 . ? 
C42' C52' 1.344(17) . ? 
C42' H42' 0.9400 . ? 
C52' C62' 1.396(12) . ? 
C52' H52' 0.9400 . ? 
C62' C10" 1.503(9) . ? 
C72' C82' 1.536(12) . ? 
C72' C92' 1.541(12) . ? 
C72' H72' 0.9900 . ? 
C82' H82D 0.9700 . ? 
C82' H82E 0.9700 . ? 
C82' H82F 0.9700 . ? 
C92' H92D 0.9700 . ? 
C92' H92E 0.9700 . ? 
C92' H92F 0.9700 . ? 
C10" C12" 1.527(12) . ? 
C10" C11" 1.536(12) . ? 
C10" H10" 0.9900 . ? 
C11" H11J 0.9700 . ? 
C11" H11K 0.9700 . ? 
C11" H11L 0.9700 . ? 
C12" H12G 0.9700 . ? 
C12" H12H 0.9700 . ? 
C12" H12I 0.9700 . ? 
C13 C63 1.401(5) . ? 
C13 C23 1.407(5) . ? 
C23 C33 1.385(5) . ? 
C23 C73 1.498(5) . ? 
C33 C43 1.369(6) . ? 
C33 H33A 0.9400 . ? 
C43 C53 1.381(7) . ? 
C43 H43A 0.9400 . ? 
C53 C63 1.373(6) . ? 
C53 H53A 0.9400 . ? 
C63 C103 1.514(6) . ? 
C73 C93 1.542(6) . ? 
C73 C83 1.544(5) . ? 
C73 H73A 0.9900 . ? 
C83 H83A 0.9700 . ? 
C83 H83B 0.9700 . ? 
C83 H83C 0.9700 . ? 
C93 H93A 0.9700 . ? 
C93 H93B 0.9700 . ? 
C93 H93C 0.9700 . ? 
C103 C123 1.516(7) . ? 
C103 C113 1.532(7) . ? 
C103 H10D 0.9900 . ? 
C113 H11G 0.9700 . ? 
C113 H11H 0.9700 . ? 
C113 H11I 0.9700 . ? 
C123 H12D 0.9700 . ? 
C123 H12E 0.9700 . ? 
C123 H12F 0.9700 . ? 
  
loop_ 
 _geom_angle_atom_site_label_1 
 _geom_angle_atom_site_label_2 
 _geom_angle_atom_site_label_3 
 _geom_angle 
 _geom_angle_site_symmetry_1 
 _geom_angle_site_symmetry_3 
 _geom_angle_publ_flag 
F1 Co1 F1' 77.6(2) 2_755 2_755 ? 
F1 Co1 N21 114.7(3) 2_755 . ? 
F1' Co1 N21 132.3(2) 2_755 . ? 
F1 Co1 N11 129.7(3) 2_755 . ? 
F1' Co1 N11 108.0(2) 2_755 . ? 
N21 Co1 N11 98.18(11) . . ? 
F1 Co1 F1 61.9(4) 2_755 . ? 
F1' Co1 F1 30.7(2) 2_755 . ? 
N21 Co1 F1 161.2(2) . . ? 
N11 Co1 F1 97.14(19) . . ? 
F1 Co1 F1' 30.6(2) 2_755 . ? 
F1' Co1 F1' 71.3(3) 2_755 . ? 
N21 Co1 F1' 96.13(18) . . ? 
N11 Co1 F1' 160.2(2) . . ? 
F1 Co1 F1' 72.0(2) . . ? 
Co1 F1 Co1 105.4(3) 2_755 . ? 
Co1 F1' Co1 103.9(2) 2_755 . ? 
C21 N11 C12 125(2) . . ? 
C21 N11 C12' 122(2) . . ? 
C21 N11 Co1 120.8(2) . . ? 
C12 N11 Co1 114(2) . . ? 
C12' N11 Co1 116(2) . . ? 
C41 N21 C13 121.1(3) . . ? 
C41 N21 Co1 117.5(2) . . ? 
C13 N21 Co1 120.8(2) . . ? 
C61 C11 C71 107.5(4) . . ? 
C61 C11 C81 107.7(4) . . ? 
C71 C11 C81 108.6(4) . . ? 
C61 C11 C21 119.2(3) . . ? 
C71 C11 C21 109.2(4) . . ? 
C81 C11 C21 104.1(4) . . ? 
N11 C21 C31 119.7(3) . . ? 
N11 C21 C11 126.4(3) . . ? 
C31 C21 C11 113.9(3) . . ? 
C41 C31 C21 134.0(3) . . ? 
C41 C31 H31A 113.0 . . ? 
C21 C31 H31A 113.0 . . ? 
N21 C41 C31 121.0(3) . . ? 
N21 C41 C51 124.2(3) . . ? 
C31 C41 C51 114.5(3) . . ? 
C111 C51 C91 107.6(3) . . ? 
C111 C51 C101 105.0(3) . . ? 
C91 C51 C101 109.4(3) . . ? 
C111 C51 C41 117.8(3) . . ? 
C91 C51 C41 104.2(3) . . ? 
C101 C51 C41 112.6(3) . . ? 
C11 C61 H61A 109.5 . . ? 
C11 C61 H61B 109.5 . . ? 
H61A C61 H61B 109.5 . . ? 
C11 C61 H61C 109.5 . . ? 
H61A C61 H61C 109.5 . . ? 
H61B C61 H61C 109.5 . . ? 
C11 C71 H71A 109.5 . . ? 
C11 C71 H71B 109.5 . . ? 
H71A C71 H71B 109.5 . . ? 
C11 C71 H71C 109.5 . . ? 
H71A C71 H71C 109.5 . . ? 
H71B C71 H71C 109.5 . . ? 
C11 C81 H81A 109.5 . . ? 
C11 C81 H81B 109.5 . . ? 
H81A C81 H81B 109.5 . . ? 
C11 C81 H81C 109.5 . . ? 
H81A C81 H81C 109.5 . . ? 
H81B C81 H81C 109.5 . . ? 
C51 C91 H91A 109.5 . . ? 
C51 C91 H91B 109.5 . . ? 
H91A C91 H91B 109.5 . . ? 
C51 C91 H91C 109.5 . . ? 
H91A C91 H91C 109.5 . . ? 
H91B C91 H91C 109.5 . . ? 
C51 C101 H10A 109.5 . . ? 
C51 C101 H10B 109.5 . . ? 
H10A C101 H10B 109.5 . . ? 
C51 C101 H10C 109.5 . . ? 
H10A C101 H10C 109.5 . . ? 
H10B C101 H10C 109.5 . . ? 
C51 C111 H11A 109.5 . . ? 
C51 C111 H11B 109.5 . . ? 
H11A C111 H11B 109.5 . . ? 
C51 C111 H11C 109.5 . . ? 
H11A C111 H11C 109.5 . . ? 
H11B C111 H11C 109.5 . . ? 
C62 C12 C22 125.3(10) . . ? 
C62 C12 N11 112.0(13) . . ? 
C22 C12 N11 122.5(12) . . ? 
C32 C22 C12 114.7(10) . . ? 
C32 C22 C72 120.8(13) . . ? 
C12 C22 C72 124.6(14) . . ? 
C42 C32 C22 119.8(13) . . ? 
C42 C32 H32 120.1 . . ? 
C22 C32 H32 120.1 . . ? 
C52 C42 C32 124.0(14) . . ? 
C52 C42 H42 118.0 . . ? 
C32 C42 H42 118.0 . . ? 
C42 C52 C62 118.9(15) . . ? 
C42 C52 H52 120.6 . . ? 
C62 C52 H52 120.6 . . ? 
C12 C62 C52 116.8(13) . . ? 
C12 C62 C102 127.0(16) . . ? 
C52 C62 C102 116.2(15) . . ? 
C22 C72 C82 108.5(16) . . ? 
C22 C72 C92 113.3(15) . . ? 
C82 C72 C92 111.0(13) . . ? 
C22 C72 H72 108.0 . . ? 
C82 C72 H72 108.0 . . ? 
C92 C72 H72 108.0 . . ? 
C62 C102 C122 118.6(18) . . ? 
C62 C102 C112 112(2) . . ? 
C122 C102 C112 106.1(12) . . ? 
C62 C102 H102 106.6 . . ? 
C122 C102 H102 106.6 . . ? 
C112 C102 H102 106.6 . . ? 
C62' C12' C22' 119.3(9) . . ? 
C62' C12' N11 125.2(12) . . ? 
C22' C12' N11 115.3(13) . . ? 
C32' C22' C12' 120.0(11) . . ? 
C32' C22' C72' 119.1(14) . . ? 
C12' C22' C72' 121.0(15) . . ? 
C22' C32' C42' 118.6(13) . . ? 
C22' C32' H32' 120.7 . . ? 
C42' C32' H32' 120.7 . . ? 
C52' C42' C32' 121.2(14) . . ? 
C52' C42' H42' 119.4 . . ? 
C32' C42' H42' 119.4 . . ? 
C42' C52' C62' 120.7(15) . . ? 
C42' C52' H52' 119.6 . . ? 
C62' C52' H52' 119.6 . . ? 
C12' C62' C52' 119.7(12) . . ? 
C12' C62' C10" 120.5(16) . . ? 
C52' C62' C10" 119.5(15) . . ? 
C22' C72' C82' 110.2(17) . . ? 
C22' C72' C92' 112.7(16) . . ? 
C82' C72' C92' 108.9(13) . . ? 
C22' C72' H72' 108.3 . . ? 
C82' C72' H72' 108.3 . . ? 
C92' C72' H72' 108.3 . . ? 
C62' C10" C12" 110.0(18) . . ? 
C62' C10" C11" 111.5(19) . . ? 
C12" C10" C11" 109.7(13) . . ? 
C62' C10" H10" 108.5 . . ? 
C12" C10" H10" 108.5 . . ? 
C11" C10" H10" 108.5 . . ? 
C63 C13 C23 119.4(3) . . ? 
C63 C13 N21 118.6(3) . . ? 
C23 C13 N21 121.9(3) . . ? 
C33 C23 C13 118.6(4) . . ? 
C33 C23 C73 117.6(4) . . ? 
C13 C23 C73 123.8(3) . . ? 
C43 C33 C23 122.1(4) . . ? 
C43 C33 H33A 118.9 . . ? 
C23 C33 H33A 118.9 . . ? 
C33 C43 C53 118.5(4) . . ? 
C33 C43 H43A 120.8 . . ? 
C53 C43 H43A 120.8 . . ? 
C63 C53 C43 121.9(4) . . ? 
C63 C53 H53A 119.0 . . ? 
C43 C53 H53A 119.0 . . ? 
C53 C63 C13 119.2(4) . . ? 
C53 C63 C103 118.4(4) . . ? 
C13 C63 C103 122.4(4) . . ? 
C23 C73 C93 112.0(4) . . ? 
C23 C73 C83 111.3(3) . . ? 
C93 C73 C83 109.8(4) . . ? 
C23 C73 H73A 107.8 . . ? 
C93 C73 H73A 107.8 . . ? 
C83 C73 H73A 107.8 . . ? 
C73 C83 H83A 109.5 . . ? 
C73 C83 H83B 109.5 . . ? 
H83A C83 H83B 109.5 . . ? 
C73 C83 H83C 109.5 . . ? 
H83A C83 H83C 109.5 . . ? 
H83B C83 H83C 109.5 . . ? 
C73 C93 H93A 109.5 . . ? 
C73 C93 H93B 109.5 . . ? 
H93A C93 H93B 109.5 . . ? 
C73 C93 H93C 109.5 . . ? 
H93A C93 H93C 109.5 . . ? 
H93B C93 H93C 109.5 . . ? 
C63 C103 C123 114.1(5) . . ? 
C63 C103 C113 111.1(4) . . ? 
C123 C103 C113 108.3(4) . . ? 
C63 C103 H10D 107.7 . . ? 
C123 C103 H10D 107.7 . . ? 
C113 C103 H10D 107.7 . . ? 
C103 C113 H11G 109.5 . . ? 
C103 C113 H11H 109.5 . . ? 
H11G C113 H11H 109.5 . . ? 
C103 C113 H11I 109.5 . . ? 
H11G C113 H11I 109.5 . . ? 
H11H C113 H11I 109.5 . . ? 
C103 C123 H12D 109.5 . . ? 
C103 C123 H12E 109.5 . . ? 
H12D C123 H12E 109.5 . . ? 
C103 C123 H12F 109.5 . . ? 
H12D C123 H12F 109.5 . . ? 
H12E C123 H12F 109.5 . . ? 
  
loop_ 
 _geom_torsion_atom_site_label_1 
 _geom_torsion_atom_site_label_2 
 _geom_torsion_atom_site_label_3 
 _geom_torsion_atom_site_label_4 
 _geom_torsion 
 _geom_torsion_site_symmetry_1 
 _geom_torsion_site_symmetry_2 
 _geom_torsion_site_symmetry_3 
 _geom_torsion_site_symmetry_4 
 _geom_torsion_publ_flag 
F1 Co1 F1 Co1 -39.6(5) 2_755 . . 2_755 ? 
F1' Co1 F1 Co1 75.4(5) 2_755 . . 2_755 ? 
N21 Co1 F1 Co1 44.6(10) . . . 2_755 ? 
N11 Co1 F1 Co1 -171.1(3) . . . 2_755 ? 
F1' Co1 F1 Co1 -8.1(5) . . . 2_755 ? 
F1 Co1 F1' Co1 72.9(6) 2_755 . . 2_755 ? 
F1' Co1 F1' Co1 -24.4(4) 2_755 . . 2_755 ? 
N21 Co1 F1' Co1 -157.1(3) . . . 2_755 ? 
N11 Co1 F1' Co1 66.7(8) . . . 2_755 ? 
F1 Co1 F1' Co1 7.9(4) . . . 2_755 ? 
F1 Co1 N11 C21 150.0(4) 2_755 . . . ? 
F1' Co1 N11 C21 -121.4(3) 2_755 . . . ? 
N21 Co1 N11 C21 18.1(3) . . . . ? 
F1 Co1 N11 C21 -150.9(4) . . . . ? 
F1' Co1 N11 C21 154.1(6) . . . . ? 
F1 Co1 N11 C12 -22.0(9) 2_755 . . . ? 
F1' Co1 N11 C12 66.5(8) 2_755 . . . ? 
N21 Co1 N11 C12 -153.9(8) . . . . ? 
F1 Co1 N11 C12 37.1(8) . . . . ? 
F1' Co1 N11 C12 -18.0(10) . . . . ? 
F1 Co1 N11 C12' -42.7(8) 2_755 . . . ? 
F1' Co1 N11 C12' 45.9(8) 2_755 . . . ? 
N21 Co1 N11 C12' -174.5(7) . . . . ? 
F1 Co1 N11 C12' 16.4(8) . . . . ? 
F1' Co1 N11 C12' -38.6(10) . . . . ? 
F1 Co1 N21 C41 -170.3(3) 2_755 . . . ? 
F1' Co1 N21 C41 94.1(3) 2_755 . . . ? 
N11 Co1 N21 C41 -29.4(3) . . . . ? 
F1 Co1 N21 C41 114.9(8) . . . . ? 
F1' Co1 N21 C41 164.3(3) . . . . ? 
F1 Co1 N21 C13 0.3(3) 2_755 . . . ? 
F1' Co1 N21 C13 -95.3(3) 2_755 . . . ? 
N11 Co1 N21 C13 141.2(3) . . . . ? 
F1 Co1 N21 C13 -74.5(8) . . . . ? 
F1' Co1 N21 C13 -25.1(3) . . . . ? 
C12 N11 C21 C31 173.6(8) . . . . ? 
C12' N11 C21 C31 -164.1(10) . . . . ? 
Co1 N11 C21 C31 2.5(5) . . . . ? 
C12 N11 C21 C11 -4.7(10) . . . . ? 
C12' N11 C21 C11 17.6(11) . . . . ? 
Co1 N11 C21 C11 -175.8(3) . . . . ? 
C61 C11 C21 N11 -3.9(7) . . . . ? 
C71 C11 C21 N11 -128.0(5) . . . . ? 
C81 C11 C21 N11 116.1(5) . . . . ? 
C61 C11 C21 C31 177.8(4) . . . . ? 
C71 C11 C21 C31 53.7(5) . . . . ? 
C81 C11 C21 C31 -62.2(5) . . . . ? 
N11 C21 C31 C41 -22.9(7) . . . . ? 
C11 C21 C31 C41 155.5(4) . . . . ? 
C13 N21 C41 C31 -149.7(3) . . . . ? 
Co1 N21 C41 C31 20.9(4) . . . . ? 
C13 N21 C41 C51 37.8(5) . . . . ? 
Co1 N21 C41 C51 -151.6(3) . . . . ? 
C21 C31 C41 N21 9.2(6) . . . . ? 
C21 C31 C41 C51 -177.7(4) . . . . ? 
N21 C41 C51 C111 -29.0(5) . . . . ? 
C31 C41 C51 C111 158.0(4) . . . . ? 
N21 C41 C51 C91 90.0(4) . . . . ? 
C31 C41 C51 C91 -82.9(4) . . . . ? 
N21 C41 C51 C101 -151.5(3) . . . . ? 
C31 C41 C51 C101 35.5(4) . . . . ? 
C21 N11 C12 C62 96(3) . . . . ? 
Co1 N11 C12 C62 -92(3) . . . . ? 
C21 N11 C12 C22 -89(4) . . . . ? 
Co1 N11 C12 C22 83(4) . . . . ? 
C62 C12 C22 C32 -6(6) . . . . ? 
N11 C12 C22 C32 179(3) . . . . ? 
C62 C12 C22 C72 173(3) . . . . ? 
N11 C12 C22 C72 -2(6) . . . . ? 
C12 C22 C32 C42 0(4) . . . . ? 
C72 C22 C32 C42 -179(2) . . . . ? 
C22 C32 C42 C52 3(4) . . . . ? 
C32 C42 C52 C62 0(4) . . . . ? 
C22 C12 C62 C52 9(6) . . . . ? 
N11 C12 C62 C52 -176(3) . . . . ? 
C22 C12 C62 C102 -174(3) . . . . ? 
N11 C12 C62 C102 1(5) . . . . ? 
C42 C52 C62 C12 -6(5) . . . . ? 
C42 C52 C62 C102 177(3) . . . . ? 
C32 C22 C72 C82 73(3) . . . . ? 
C12 C22 C72 C82 -106(4) . . . . ? 
C32 C22 C72 C92 -51(3) . . . . ? 
C12 C22 C72 C92 131(3) . . . . ? 
C12 C62 C102 C122 -118(3) . . . . ? 
C52 C62 C102 C122 59(3) . . . . ? 
C12 C62 C102 C112 118(4) . . . . ? 
C52 C62 C102 C112 -65(3) . . . . ? 
C21 N11 C12' C62' 82(4) . . . . ? 
Co1 N11 C12' C62' -85(4) . . . . ? 
C21 N11 C12' C22' -103(3) . . . . ? 
Co1 N11 C12' C22' 89(4) . . . . ? 
C62' C12' C22' C32' -5(6) . . . . ? 
N11 C12' C22' C32' -180(2) . . . . ? 
C62' C12' C22' C72' 176(3) . . . . ? 
N11 C12' C22' C72' 1(5) . . . . ? 
C12' C22' C32' C42' 4(4) . . . . ? 
C72' C22' C32' C42' -177(2) . . . . ? 
C22' C32' C42' C52' 2(4) . . . . ? 
C32' C42' C52' C62' -6(4) . . . . ? 
C22' C12' C62' C52' 0(6) . . . . ? 
N11 C12' C62' C52' 175(3) . . . . ? 
C22' C12' C62' C10" -173(3) . . . . ? 
N11 C12' C62' C10" 1(6) . . . . ? 
C42' C52' C62' C12' 5(5) . . . . ? 
C42' C52' C62' C10" 179(3) . . . . ? 
C32' C22' C72' C82' 72(3) . . . . ? 
C12' C22' C72' C82' -108(3) . . . . ? 
C32' C22' C72' C92' -50(3) . . . . ? 
C12' C22' C72' C92' 130(3) . . . . ? 
C12' C62' C10" C12" -111(3) . . . . ? 
C52' C62' C10" C12" 75(3) . . . . ? 
C12' C62' C10" C11" 127(3) . . . . ? 
C52' C62' C10" C11" -47(4) . . . . ? 
C41 N21 C13 C63 68.9(4) . . . . ? 
Co1 N21 C13 C63 -101.4(3) . . . . ? 
C41 N21 C13 C23 -113.6(4) . . . . ? 
Co1 N21 C13 C23 76.1(4) . . . . ? 
C63 C13 C23 C33 -3.9(6) . . . . ? 
N21 C13 C23 C33 178.6(3) . . . . ? 
C63 C13 C23 C73 176.5(4) . . . . ? 
N21 C13 C23 C73 -1.0(5) . . . . ? 
C13 C23 C33 C43 -0.3(7) . . . . ? 
C73 C23 C33 C43 179.2(5) . . . . ? 
C23 C33 C43 C53 3.9(8) . . . . ? 
C33 C43 C53 C63 -3.2(9) . . . . ? 
C43 C53 C63 C13 -1.0(8) . . . . ? 
C43 C53 C63 C103 177.1(5) . . . . ? 
C23 C13 C63 C53 4.6(6) . . . . ? 
N21 C13 C63 C53 -177.8(4) . . . . ? 
C23 C13 C63 C103 -173.4(4) . . . . ? 
N21 C13 C63 C103 4.2(6) . . . . ? 
C33 C23 C73 C93 -65.5(5) . . . . ? 
C13 C23 C73 C93 114.1(4) . . . . ? 
C33 C23 C73 C83 57.9(5) . . . . ? 
C13 C23 C73 C83 -122.5(4) . . . . ? 
C53 C63 C103 C123 66.2(6) . . . . ? 
C13 C63 C103 C123 -115.8(5) . . . . ? 
C53 C63 C103 C113 -56.6(6) . . . . ? 
C13 C63 C103 C113 121.4(5) . . . . ? 
  
_diffrn_measured_fraction_theta_max    0.999 
_diffrn_reflns_theta_full              25.03 
_diffrn_measured_fraction_theta_full   0.999 
_refine_diff_density_max    0.423 
_refine_diff_density_min   -0.256 
_refine_diff_density_rms    0.045 
#===END
